# Supplementary material for: Mercury(II) Binding to Metallothionein in Mytilus edulis revealed by High Energy‐Resolution XANES Spectroscopy
Source: PubMed Central journal article supplement — Chemistry. 2018 Dec 27;25(4):997–1009. doi: 10.1002/chem.201804209 (PMC6582439; doi:10.1002/chem.201804209), 2018-12-27
Supplement: CHEM-25-997-s001.pdf [file CHEM-25-997-s001.pdf]

# CHEMISTRY

## A **European** Journal

### Supporting Information

#### **Mercury(II) Binding to Metallothionein in *Mytilus edulis* revealed by High Energy-Resolution XANES Spectroscopy**

Alain Manceau,<sup>\*[a]</sup> Paco Bustamante,<sup>[b]</sup> Ahmed Haouz,<sup>[c]</sup> Jean Paul Bourdineaud,<sup>[d]</sup>  
Maria Gonzalez-Rey,<sup>[e]</sup> Cyprien Lemouchi,<sup>[f]</sup> Isabelle Gautier-Luneau,<sup>[ff]</sup> Valérie Geertsens,<sup>[g]</sup>  
Elodie Barruet,<sup>[g]</sup> Mauro Rovezzi,<sup>[h]</sup> Pieter Glatzel,<sup>[h]</sup> and Serge Pin<sup>[g]</sup>

chem\_201804209\_sm\_miscellaneous\_information.pdf

## Content

1. HR-XANES spectroscopy
2. Supporting figures
3. References
4. HR-XANES data
5. Optimized Cartesian coordinates
6. NPA analysis of the Hg(CysSerGlyCysLys) complex

### 1. HR-XANES spectroscopy

The Hg L<sub>3</sub>-edge spectra were measured in high energy-resolution fluorescence yield detection mode with analyzer crystals.<sup>[1]</sup> Rejection of higher harmonics and reduction of heat load were achieved with a white beam Pd-coated, flat mirror working under total reflection at 2.5 mrad deflecting angle. The incoming beam was monochromatized by the 111 reflection of a Si double crystal monochromator, then focused horizontally by a second Pd-coated mirror and vertically by a third Pd-coated mirror. The flux on the sample was approximately 10<sup>13</sup> photons s<sup>-1</sup> in a beam footprint of ~700 (H) x 80 (V) μm<sup>2</sup> FWHM. The Hg L<sub>α1</sub> (3d<sub>5/2</sub> → 2p<sub>3/2</sub>) fluorescence line was selected using the 555 reflection of five spherically bent (radius = 0.5 m<sup>[2]</sup>) Si analyzer crystals (diameter = 100 mm) aligned at an 81.8° Bragg angle in a vertical Rowland geometry. The diffracted intensity was measured with a Si drift diode detector (SDD) in single photon counting mode. The effective energy resolution, obtained by convoluting the total instrument energy bandwidth (spreads of the incident and emitted rays), the SDD resolution (~160 eV), and the 3d<sub>5/2</sub> core-hole width from the L<sub>α1</sub> line was about 3.0 eV, compared to an intrinsic line broadening of about 6.1 eV in conventional fluorescence yield measurement with a solid-state detector.

### 2. Supporting figures

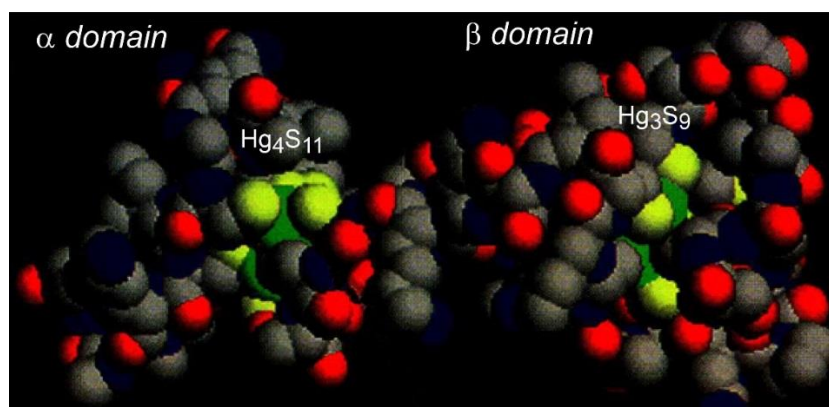

**Figure S1.** Space-filling representation of the mammalian Hg<sub>7</sub>-MT model optimized by Fowle and Stillman<sup>[3]</sup> using molecular mechanics (MM2). The Hg<sub>3</sub>S<sub>9</sub> cluster from the β domain is embedded within the peptide chain, whereas the bigger Hg<sub>4</sub>S<sub>11</sub> cluster is incompletely shielded from solvent by the protein. Thiolate groups exposed to the solvent at the MT surface (α domain) or in clefts (β domain) can establish intermolecular linkages between the monomeric units of the MT-20/30/40 oligomers through disulfide bonds.

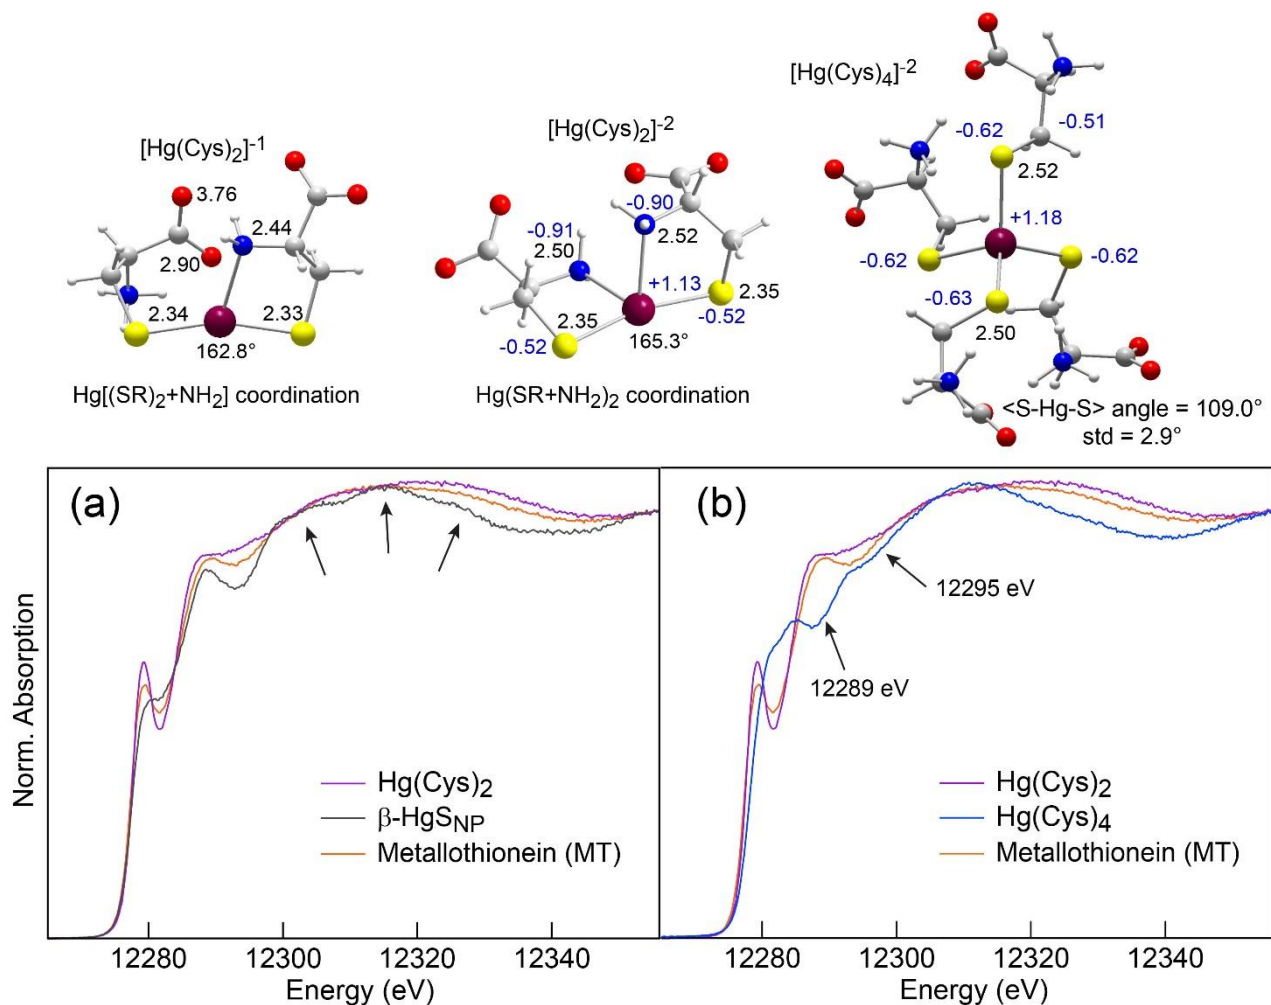

**Figure S2.** Mercury L<sub>3</sub>-edge HR-XANES spectra of metallothionein (MT) and three references relevant to this study: Hg(Cys)<sub>2</sub> complex in which Hg(II) is bonded linearly to two cysteines (Cys:Hg = 2.0, pH 7.5), Hg(Cys)<sub>4</sub> complex in which Hg(II) is bonded tetrahedrally to four cysteines (Cys:Hg = 10.0, pH 11.9), and nanoparticulate metacinnabar (β-HgS<sub>NP</sub>) in which Hg(II) is bonded to four sulfides (HgS<sub>4</sub>) and surrounded by Hg(II) atoms. The best two-component fit for the MT spectrum to a large dataset of references (ref.<sup>[4]</sup> and refs. therein) was obtained with Hg(Cys)<sub>2</sub> and β-HgS<sub>NP</sub> (Figure 5). A look at plot (a) confirms that the MT spectrum is intermediate between the two best-fit references. Plot (b) shows that the Hg(Cys)<sub>4</sub> reference provides a poor match to the MT spectrum. For example, the absorption signal of MT is close to that of Hg(Cys)<sub>2</sub> at 12289 eV and close to that of Hg(Cys)<sub>4</sub> at 12295 eV. Clearly, the MT spectrum cannot be reconstructed with a linear combination of a dithiolate and a mononuclear tetrathiolate environment. The XANES for β-HgS<sub>NP</sub> is structured by multiple scattering Hg-Hg paths of the photoelectron (arrows in plot (a)), in contrast to Hg(Cys)<sub>4</sub>. The two complexes were optimized geometrically (MP2/def2-TZVP-ecp<sup>[5]</sup>). At circumneutral pH, a Hg[(SR)<sub>2</sub>+NH<sub>2</sub>]<sub>2</sub> coordination likely coexists in equilibrium with the low-pH Hg(SR)<sub>2</sub> and the high-pH Hg(SR+NH<sub>2</sub>)<sub>2</sub> coordinations (see ref.<sup>[6]</sup> for details). Bond lengths (in angstroms) and bond angles are in black. Atomic charges, in units of elementary charge *e* and calculated by natural population analysis (NPA<sup>[7]</sup>) are in blue. Dark red, Hg; yellow, S; blue, N; red, O; gray, C; light gray, H.

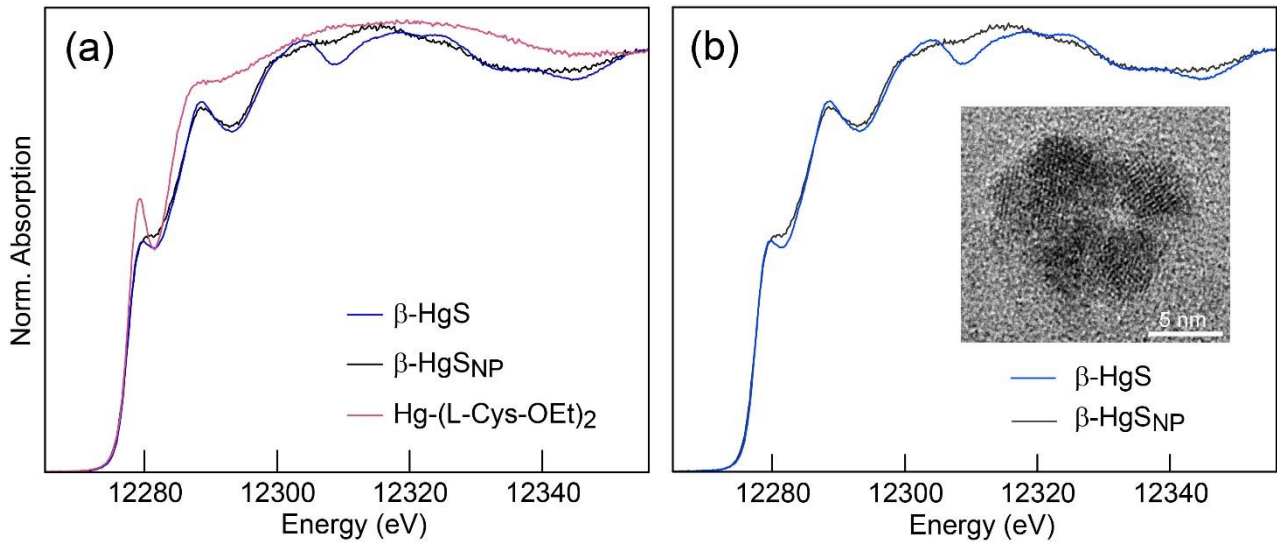

**Figure S3.** (a) Mercury L<sub>3</sub>-edge HR-XANES spectra of well ( $\beta$ -HgS) and nano ( $\beta$ -HgSNP) crystallized metacinnabar and the Hg-(L-Cys-OEt)<sub>2</sub> complex used to synthesize  $\beta$ -HgSNP. (b) The variations of the absorption signal in the main edge of  $\beta$ -HgS and  $\beta$ -HgSNP come from multiple scattering events along Hg<sub>1</sub> → Hg<sub>2</sub> ... Hg<sub>n</sub> → Hg<sub>1</sub> paths of the photoelectron. Structural disorder and small particle size reduce their amplitude. The spectra and the HRTEM image of the  $\beta$ -HgSNP crystallites in insert are from ref.<sup>[8]</sup>.

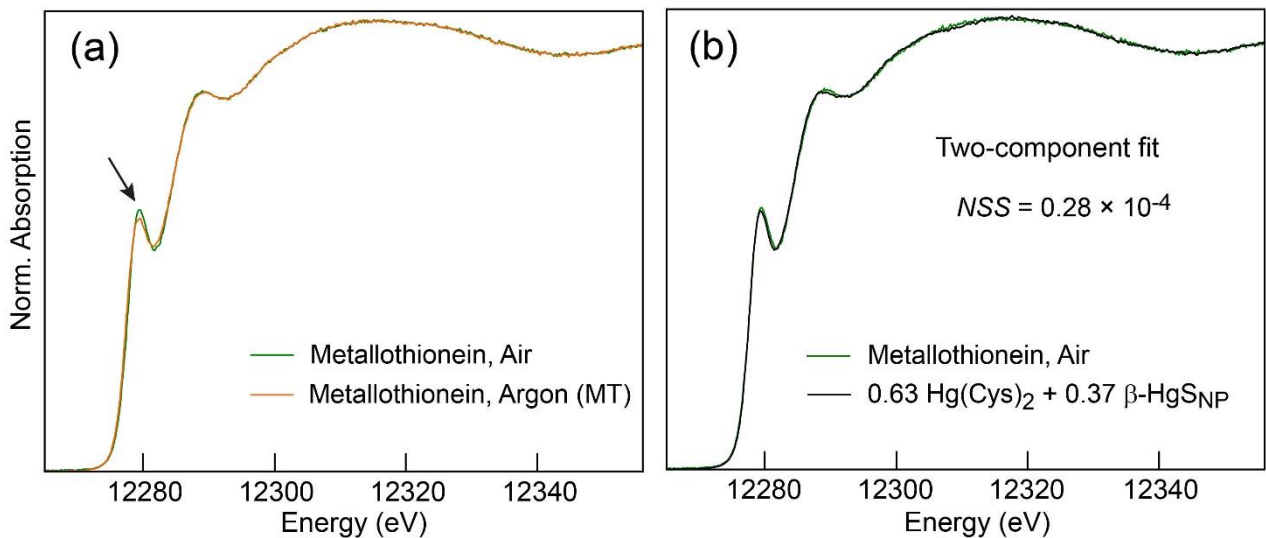

**Figure S4.** (a) Mercury L<sub>3</sub>-edge HR-XANES spectra of two MT isolates, one purified in argon-saturated and the other in air-equilibrated homogenate from mussel tissue. (b) Fit of the HR-XANES spectrum for the air-equilibrated MT.

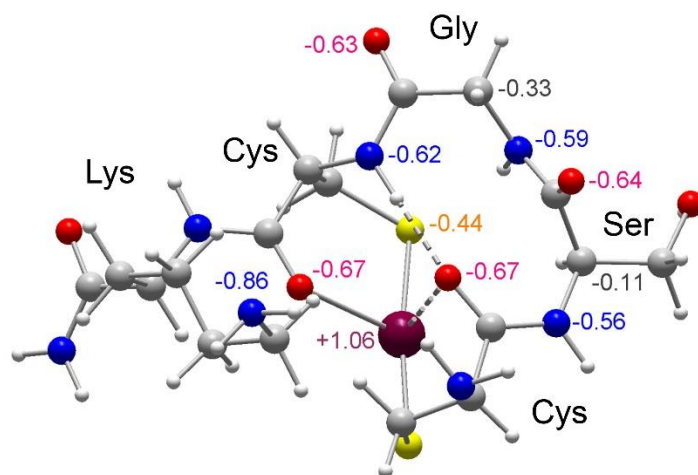

**Figure S5.** Atomic charges in units of elementary charge  $e$  calculated by natural population analysis (NPA<sup>[7]</sup>) for the Hg(CysSerGlyCysLys) model complex. Dark red, Hg; yellow, S; blue, N; red, O; gray, C; light gray, H.

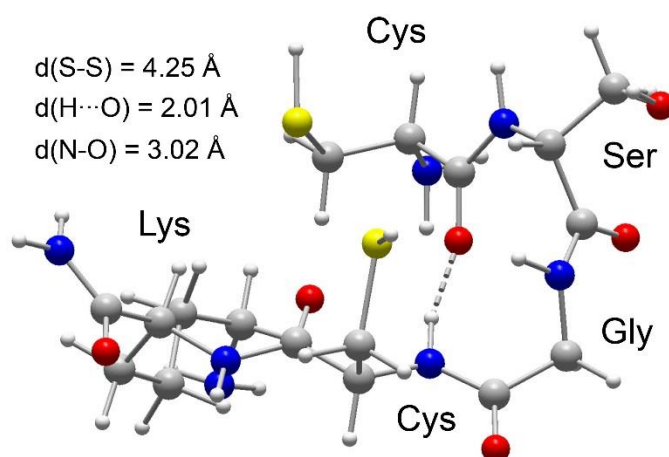

**Figure S6.** Geometry optimized (MP2/TZVP) crab claw shape of the CysSerGlyCysLys amino acid sequence of the  $\alpha$  domain. The two Cys residues lie above the quasi-planar CXXC loop stabilized by a  $>NH...OC<$  hydrogen bond. Mercury binding stabilizes the entire loop even further, giving it a very well-defined bis-six-membered ring chelate conformation (Figures 6b and S5).

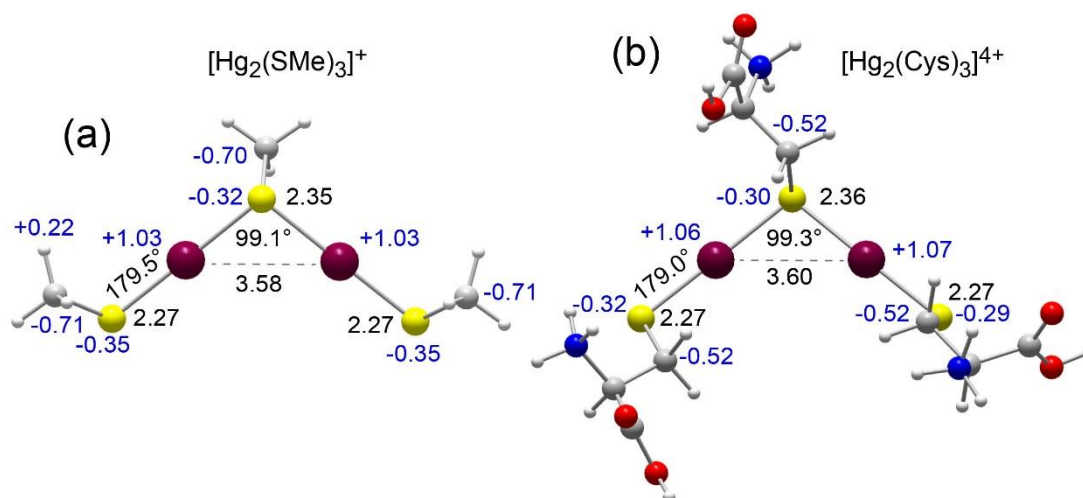



**Figure S7.** Geometry-optimized  $[\text{Hg}_2(\text{SMe})_3]^+$  (a) and  $[\text{Hg}_2(\text{Cys})_3]^{4+}$  (b) dimers (MP2/def2-TZVP-ecp<sup>[5]</sup>) and NPA<sup>[7]</sup> atomic charges (in blue and in units of elementary charge e). The cysteine group in the  $\text{Hg}_x\text{S}_y$  clusters from Figure 6 was represented by methanethiolate ( $\text{SCH}_3^- = \text{SMe}$ ) for simplification, as the dissociation energy of the R-SH bond is almost independent of R. We verify in this calculation that the methanethiolate for cysteinyl thiolate substitution does not alter the geometry of the complex nor change the partial atomic charges of Hg and S. Bond lengths (in angstroms) and bond angles are in black. Dark red, Hg; yellow, S; blue, N; red, O; gray, C; light gray, H.

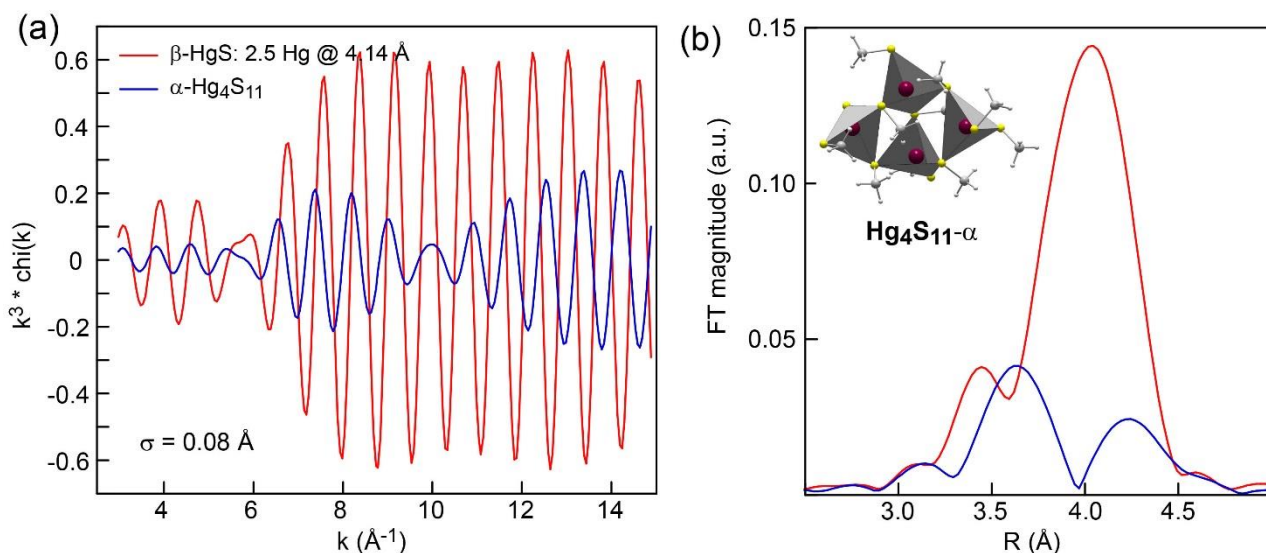

**Figure S8.** EXAFS photoelectron wave (a) and Fourier transform (b) of the first Hg-Hg shell for the  $\text{Hg}_4\text{S}_{11}\text{-}\alpha$  cluster.  $\langle \text{CN}(\text{Hg}) \rangle = 2.5$  and the predicted Hg-Hg distances are 3.82  $\text{\AA}$ , 4.05  $\text{\AA}$ , 4.20  $\text{\AA}$ , 4.24  $\text{\AA}$ , and 4.34  $\text{\AA}$  ( $\langle d(\text{Hg-Hg}) \rangle = 4.13$   $\text{\AA}$ ,  $\sigma = 0.19$   $\text{\AA}$ ).

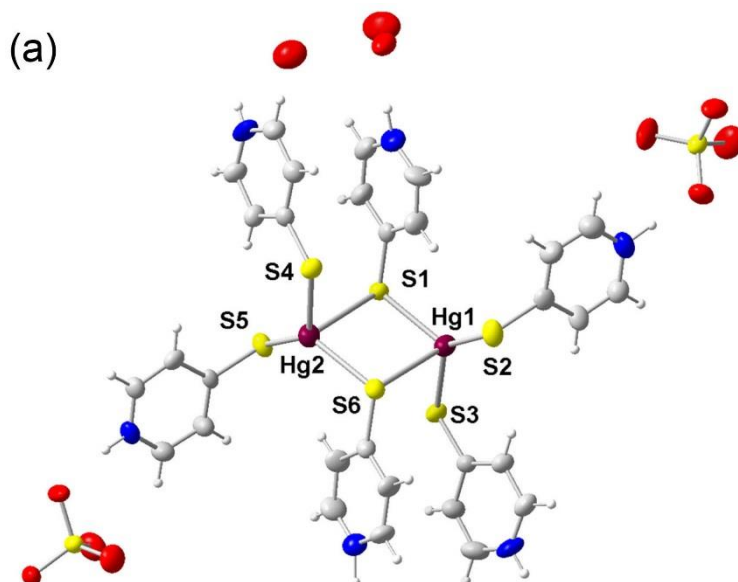

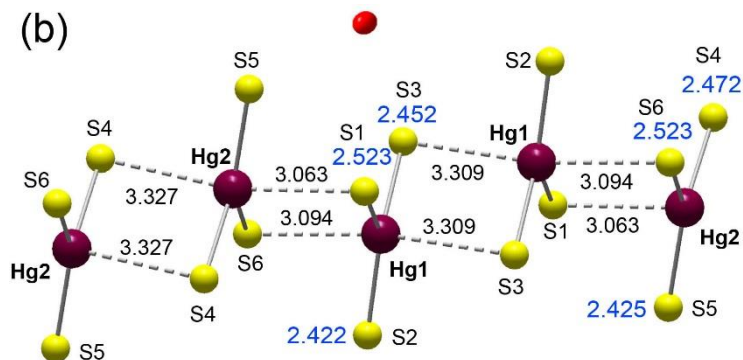

**Figure S9.** (a) Representation of the  $[\text{Hg}_2(\text{C}_5\text{H}_5\text{NS})_6](\text{SO}_4)_2 \cdot 4\text{H}_2\text{O}$  asymmetric unit containing two crystallographic independent cationic  $[\text{Hg}(\text{C}_5\text{H}_5\text{NS})_3]^{2+}$  molecules. The Hg atoms are in a trigonal environment slightly off the mercapto planes ( $0.07 \text{ \AA}$  off S1, S2, S3 for Hg1 and  $0.05 \text{ \AA}$  off S4, S5, S6 for Hg2). The bond lengths (in  $\text{\AA}$ ) are Hg1-S1 =  $2.523(2)$ , Hg1-S2 =  $2.422(2)$ , Hg1-S3 =  $2.452(2)$ , Hg2-S4 =  $2.472(2)$ , Hg2-S5 =  $2.425(2)$ , Hg2-S6 =  $2.523(2)$ . (b) The coordination sphere of the Hg atoms is trigonal bipyramidal, with two apical S atoms from neighboring molecules resulting in linear chains. Linear chains are constituted of three types of  $\{\text{Hg-S-Hg-S}\}$  cycles. Two are centrosymmetric, one with  $d(\text{Hg1-S3}) = 3.309(2) \text{ \AA}$  and another with  $d(\text{Hg2-S4}) = 3.327(2) \text{ \AA}$ , leading to  $\text{Hg}\cdots\text{Hg}$  distances of  $3.898(2) \text{ \AA}$  and  $3.901(2) \text{ \AA}$ , respectively. The third is non-centrosymmetric with  $d(\text{Hg1-S6}) = 3.094(2) \text{ \AA}$  and  $d(\text{Hg2-S1}) = 3.063(2) \text{ \AA}$ , respectively, leading to a  $\text{Hg1}\cdots\text{Hg2}$  distance of  $3.889(2) \text{ \AA}$ . The chains are interconnected together by hydrogen bonds between pyridinium, sulfate anions and water molecules.

Two Cu(I) complexes with 4-mercaptopyridinium zwitterionic ligand have been reported<sup>[9]</sup>,  $[\text{Cu}(\text{C}_5\text{H}_5\text{NS})_4] \cdot 2\text{Cl}$  and  $[\text{Cu}(\text{C}_5\text{H}_5\text{NS})_4] \cdot \text{SiF}_6 \cdot 2\text{MeOH}$ , which have similar formula to  $[\text{Hg}_2(\text{C}_5\text{H}_5\text{NS})_6](\text{SO}_4)_2 \cdot 4\text{H}_2\text{O}$ . In contrast to the Hg complex, the structures feature centrosymmetric binuclear complexes and the Cu(I) atoms are four-coordinate with average Cu-S bond lengths of  $2.40 \text{ \AA}$  and  $2.30 \text{ \AA}$  for the bridging and terminal ligands, respectively.

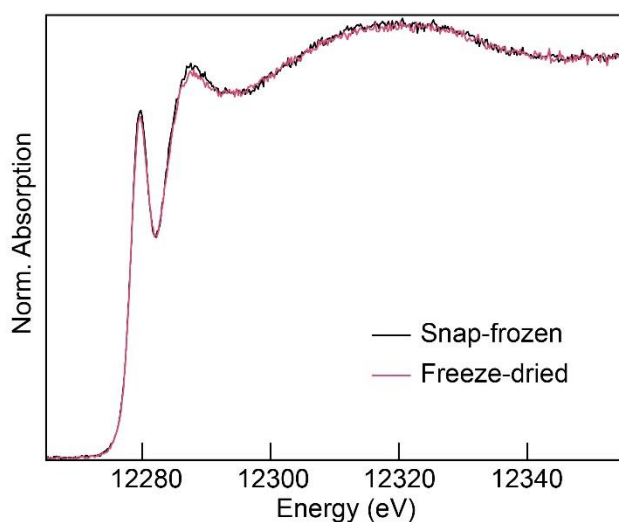

**Figure S10.** Mercury  $L_3$ -edge HR-XANES spectra of swordfish skeletal muscle prepared in two different ways: by snap-freezing a fresh hydrated tissue and by freeze-drying and pressing ( $444 \text{ MPa}$ ) into a pellet a frozen tissue. The sharp near-edge structure is a fingerprint for the  $\text{CH}_3\text{-Hg-SR}$  bond of methylmercury complexed to biological cysteine residues from peptide or protein.<sup>[6]</sup> The identity of the two spectra, within the noise, means that the  $\text{Hg(II)-CH}_3$  and the  $\text{Hg(II)-SR}$  bonds both resisted dehydration under vacuum and moderate pressure.

### 3. References

- [1] P. Glatzel, T. C. Weng, K. Kvashnina, J. Swarbrick, M. Sikora, E. Gallo, N. Smolentsev and R. A. Mori, *J. Elec. Spec. Relat. Phenom.* **2013**, *188*, 17-25.
- [2] M. Rovezzi, C. Lapras, A. Manceau, P. Glatzel and R. Verbeni, *Rev. Sci. Instr.* **2017**, *88*, 013108.
- [3] D. A. Fowle and M. J. Stillman, *J. Biomol. Str. Dyn.* **1997**, *14*, 393-406.
- [4] A. Manceau, J. Wang, M. Rovezzi, P. Glatzel and X. Feng, *Environ. Sci. Technol.* **2018**, *52*, 3935–3948.
- [5] F. Neese, *WIREs Comput. Mol. Sci.* **2012**, *2*, 73-78.
- [6] A. Manceau, M. Enescu, A. Simionovici, M. Lanson, M. Gonzalez-Rey, M. Rovezzi, R. Tucoulou, P. Glatzel, K. L. Nagy and J.-P. Bourdineaud, *Environ. Sci. Technol.* **2016**, *50*, 10721–10729.
- [7] E. D. Glendening, C. R. Landis and F. Weinhold, *J. Comput. Chem.* **2013**, *34*, 1429-1437.
- [8] A. Manceau, C. Lemouchi, M. Enescu, A.-C. Gaillot, M. Lanson, V. Magnin, P. Glatzel, B. A. Poulin, J. N. Ryan, G. R. Aiken, I. Gautier-Luneau and K. L. Nagy, *Environ. Sci. Technol.* **2015**, *49*, 9787–9796.
- [9] S. Bianketti, A. J. Blake, C. Wilson, P. Hubberstey, N. R. Champness and M. Schroder, *Crystengcomm* **2009**, *11*, 763-769.

### 4. HR-XANES data

| ME                        | MT_Air                    | T_Argon                   |
|---------------------------|---------------------------|---------------------------|
| 1.2258820E+4 3.0583329E-4 | 1.2258820E+4 4.7706828E-3 | 1.2258820E+4 1.2431541E-3 |
| 1.2258840E+4 3.0998651E-4 | 1.2258840E+4 4.6142566E-3 | 1.2258840E+4 1.2447467E-3 |
| 1.2258980E+4 3.3366120E-4 | 1.2258980E+4 3.2354888E-3 | 1.2258980E+4 1.3511280E-3 |
| 1.2259200E+4 3.8925987E-4 | 1.2259200E+4 3.8754295E-3 | 1.2259200E+4 1.2498947E-3 |
| 1.2259410E+4 3.6761042E-4 | 1.2259410E+4 4.2808968E-3 | 1.2259410E+4 8.0460482E-4 |
| 1.2259620E+4 3.0252888E-4 | 1.2259620E+4 4.2046641E-3 | 1.2259620E+4 1.1854319E-3 |
| 1.2259820E+4 4.1355212E-4 | 1.2259820E+4 4.6939334E-3 | 1.2259820E+4 1.6527924E-3 |
| 1.2260020E+4 4.3025388E-4 | 1.2260020E+4 3.0387831E-3 | 1.2260020E+4 1.3072032E-3 |
| 1.2260210E+4 3.8933738E-4 | 1.2260210E+4 2.8396122E-3 | 1.2260210E+4 2.2397377E-3 |
| 1.2260400E+4 3.8992397E-4 | 1.2260400E+4 4.3375014E-3 | 1.2260400E+4 1.6755351E-3 |
| 1.2260590E+4 3.8906836E-4 | 1.2260590E+4 2.0150138E-3 | 1.2260590E+4 1.2467509E-3 |
| 1.2260800E+4 4.1840826E-4 | 1.2260800E+4 2.6833678E-3 | 1.2260800E+4 1.0295534E-3 |
| 1.2261020E+4 4.1715896E-4 | 1.2261020E+4 2.5597407E-3 | 1.2261020E+4 8.6439926E-4 |
| 1.2261230E+4 3.0678039E-4 | 1.2261230E+4 1.9759993E-3 | 1.2261230E+4 4.4601767E-4 |
| 1.2261440E+4 3.4990951E-4 | 1.2261440E+4 1.6033309E-3 | 1.2261440E+4 1.0929317E-3 |
| 1.2261630E+4 4.5888778E-4 | 1.2261630E+4 2.7020289E-3 | 1.2261630E+4 1.0555090E-3 |
| 1.2261830E+4 4.0060784E-4 | 1.2261830E+4 3.9250955E-3 | 1.2261830E+4 2.2850732E-3 |
| 1.2262010E+4 4.2894014E-4 | 1.2262010E+4 3.9636487E-3 | 1.2262010E+4 1.9075174E-3 |
| 1.2262190E+4 3.8070517E-4 | 1.2262190E+4 2.4078204E-3 | 1.2262190E+4 1.5988061E-3 |
| 1.2262390E+4 4.8661522E-4 | 1.2262390E+4 3.8432095E-3 | 1.2262390E+4 1.8815522E-3 |
| 1.2262600E+4 5.4754891E-4 | 1.2262600E+4 2.3637395E-3 | 1.2262600E+4 2.1142196E-3 |
| 1.2262800E+4 4.4731998E-4 | 1.2262800E+4 1.9828462E-3 | 1.2262800E+4 2.3809863E-3 |
| 1.2263000E+4 4.7539470E-4 | 1.2263000E+4 4.4867154E-3 | 1.2263000E+4 1.5215665E-3 |
| 1.2263190E+4 5.0085064E-4 | 1.2263190E+4 3.1108652E-3 | 1.2263190E+4 1.0780335E-3 |
| 1.2263370E+4 6.4812307E-4 | 1.2263370E+4 2.3679687E-3 | 1.2263370E+4 1.5121614E-3 |
| 1.2263540E+4 5.7994604E-4 | 1.2263540E+4 1.9556401E-3 | 1.2263540E+4 7.4399624E-4 |
| 1.2263710E+4 5.6084426E-4 | 1.2263710E+4 1.6720996E-3 | 1.2263710E+4 1.5826387E-3 |
| 1.2263890E+4 6.1358782E-4 | 1.2263890E+4 2.4588169E-3 | 1.2263890E+4 1.7663741E-3 |
| 1.2264080E+4 7.1657210E-4 | 1.2264080E+4 2.6750279E-3 | 1.2264080E+4 9.0059914E-4 |



|                           |                           |                           |
|---------------------------|---------------------------|---------------------------|
| 1.2264270E+4 6.3702252E-4 | 1.2264270E+4 2.7946050E-3 | 1.2264270E+4 1.3629147E-3 |
| 1.2264460E+4 6.8755500E-4 | 1.2264460E+4 4.2303219E-3 | 1.2264460E+4 1.2830315E-3 |
| 1.2264660E+4 6.2897492E-4 | 1.2264660E+4 4.0884879E-3 | 1.2264660E+4 9.9487435E-4 |
| 1.2264840E+4 8.1594546E-4 | 1.2264840E+4 3.4314813E-3 | 1.2264840E+4 2.0843986E-3 |
| 1.2265020E+4 8.1488964E-4 | 1.2265020E+4 2.1661577E-3 | 1.2265020E+4 7.4901380E-5 |
| 1.2265200E+4 6.4914282E-4 | 1.2265200E+4 2.2005997E-3 | 1.2265200E+4 7.7301397E-4 |
| 1.2265390E+4 6.0184893E-4 | 1.2265390E+4 3.5003385E-3 | 1.2265390E+4 1.5486307E-3 |
| 1.2265590E+4 7.7060262E-4 | 1.2265590E+4 4.0016359E-3 | 1.2265590E+4 1.2509589E-3 |
| 1.2265790E+4 8.0263131E-4 | 1.2265790E+4 1.7077981E-3 | 1.2265790E+4 7.3820740E-4 |
| 1.2265990E+4 8.6351397E-4 | 1.2265990E+4 2.1860440E-3 | 1.2265990E+4 1.2734519E-3 |
| 1.2266190E+4 9.4643692E-4 | 1.2266190E+4 4.0076632E-3 | 1.2266190E+4 2.0782796E-3 |
| 1.2266380E+4 9.8298230E-4 | 1.2266380E+4 2.2066093E-3 | 1.2266380E+4 1.3819494E-3 |
| 1.2266560E+4 1.0174432E-3 | 1.2266560E+4 2.2532037E-3 | 1.2266560E+4 1.6623910E-3 |
| 1.2266740E+4 9.9257947E-4 | 1.2266740E+4 3.4180787E-3 | 1.2266740E+4 2.9249898E-4 |
| 1.2266920E+4 9.7789580E-4 | 1.2266920E+4 3.3933472E-3 | 1.2266920E+4 1.3439988E-3 |
| 1.2267110E+4 9.2390516E-4 | 1.2267110E+4 2.1706139E-3 | 1.2267110E+4 2.3795288E-3 |
| 1.2267310E+4 1.0355532E-3 | 1.2267310E+4 3.2784465E-3 | 1.2267310E+4 2.0102670E-3 |
| 1.2267500E+4 1.1000449E-3 | 1.2267500E+4 4.9000489E-3 | 1.2267500E+4 1.9310680E-3 |
| 1.2267700E+4 1.1400771E-3 | 1.2267700E+4 2.6367591E-3 | 1.2267700E+4 1.7328739E-3 |
| 1.2267880E+4 1.1938927E-3 | 1.2267880E+4 2.8599100E-3 | 1.2267880E+4 1.2734522E-3 |
| 1.2268060E+4 1.3871630E-3 | 1.2268060E+4 4.5065777E-3 | 1.2268060E+4 1.4005403E-3 |
| 1.2268230E+4 1.4967827E-3 | 1.2268230E+4 3.7330697E-3 | 1.2268230E+4 1.8413106E-3 |
| 1.2268410E+4 1.3119896E-3 | 1.2268410E+4 3.5945391E-3 | 1.2268410E+4 2.1776759E-3 |
| 1.2268590E+4 1.4375432E-3 | 1.2268590E+4 4.2814737E-3 | 1.2268590E+4 2.0845960E-3 |
| 1.2268790E+4 1.4295170E-3 | 1.2268790E+4 3.9164750E-3 | 1.2268790E+4 2.5223281E-3 |
| 1.2268990E+4 1.5755146E-3 | 1.2268990E+4 4.4247383E-3 | 1.2268990E+4 2.4886473E-3 |
| 1.2269200E+4 1.7875640E-3 | 1.2269200E+4 3.8586071E-3 | 1.2269200E+4 2.2846911E-3 |
| 1.2269400E+4 1.8607530E-3 | 1.2269400E+4 4.2717750E-3 | 1.2269400E+4 2.3954135E-3 |
| 1.2269590E+4 1.8985936E-3 | 1.2269590E+4 2.4126144E-3 | 1.2269590E+4 2.4033971E-3 |
| 1.2269770E+4 1.9892351E-3 | 1.2269770E+4 3.2834447E-3 | 1.2269770E+4 2.3217924E-3 |
| 1.2269960E+4 1.9937221E-3 | 1.2269960E+4 3.8555598E-3 | 1.2269960E+4 1.2384668E-3 |
| 1.2270150E+4 2.3487597E-3 | 1.2270150E+4 4.5880342E-3 | 1.2270150E+4 1.3393651E-3 |
| 1.2270370E+4 2.5234607E-3 | 1.2270370E+4 4.7042491E-3 | 1.2270370E+4 2.4375657E-3 |
| 1.2270580E+4 2.6868361E-3 | 1.2270580E+4 4.8724292E-3 | 1.2270580E+4 2.5497809E-3 |
| 1.2270800E+4 2.9672731E-3 | 1.2270800E+4 4.8659839E-3 | 1.2270800E+4 1.6261784E-3 |
| 1.2271010E+4 3.1235366E-3 | 1.2271010E+4 6.7167023E-3 | 1.2271010E+4 2.5397179E-3 |
| 1.2271220E+4 3.5442623E-3 | 1.2271220E+4 5.9532763E-3 | 1.2271220E+4 3.1989704E-3 |
| 1.2271410E+4 3.7675515E-3 | 1.2271410E+4 6.0948678E-3 | 1.2271410E+4 4.2480432E-3 |
| 1.2271590E+4 3.8976699E-3 | 1.2271590E+4 6.8000174E-3 | 1.2271590E+4 4.1021279E-3 |
| 1.2271780E+4 4.3751929E-3 | 1.2271780E+4 5.6278626E-3 | 1.2271780E+4 4.2730832E-3 |
| 1.2272000E+4 4.9506634E-3 | 1.2272000E+4 6.5504545E-3 | 1.2272000E+4 6.0025731E-3 |
| 1.2272210E+4 5.2861498E-3 | 1.2272210E+4 7.3379286E-3 | 1.2272210E+4 6.4545230E-3 |
| 1.2272430E+4 5.9126626E-3 | 1.2272430E+4 7.3743560E-3 | 1.2272430E+4 5.9496739E-3 |
| 1.2272640E+4 6.4808239E-3 | 1.2272640E+4 8.8524347E-3 | 1.2272640E+4 7.9035759E-3 |
| 1.2272830E+4 7.5042364E-3 | 1.2272830E+4 9.4719330E-3 | 1.2272830E+4 8.2838555E-3 |
| 1.2273020E+4 8.2830410E-3 | 1.2273020E+4 1.0004011E-2 | 1.2273020E+4 8.7471249E-3 |
| 1.2273210E+4 9.2213978E-3 | 1.2273210E+4 1.0483057E-2 | 1.2273210E+4 1.0186505E-2 |
| 1.2273410E+4 1.0440288E-2 | 1.2273410E+4 1.3305304E-2 | 1.2273410E+4 1.2255249E-2 |
| 1.2273600E+4 1.1815860E-2 | 1.2273600E+4 1.5146019E-2 | 1.2273600E+4 1.4270868E-2 |
| 1.2273820E+4 1.4051531E-2 | 1.2273820E+4 1.7151446E-2 | 1.2273820E+4 1.5872260E-2 |
| 1.2274020E+4 1.6094838E-2 | 1.2274020E+4 1.9431084E-2 | 1.2274020E+4 1.9175043E-2 |
| 1.2274230E+4 1.8988024E-2 | 1.2274230E+4 2.1945443E-2 | 1.2274230E+4 2.2730557E-2 |

1.2274440E+4 2.2456721E-2 1.2274440E+4 2.5510552E-2 1.2274440E+4 2.6314099E-2  
1.2274630E+4 2.5365093E-2 1.2274630E+4 2.8528150E-2 1.2274630E+4 3.3450128E-2  
1.2274820E+4 3.0885069E-2 1.2274820E+4 3.5655145E-2 1.2274820E+4 3.8052491E-2  
1.2275010E+4 3.5464230E-2 1.2275010E+4 4.1697806E-2 1.2275010E+4 4.5164548E-2  
1.2275210E+4 4.2860505E-2 1.2275210E+4 4.8892171E-2 1.2275210E+4 5.5746024E-2  
1.2275410E+4 5.0859800E-2 1.2275410E+4 5.8549598E-2 1.2275410E+4 6.7608589E-2  
1.2275620E+4 6.2064662E-2 1.2275620E+4 7.2147431E-2 1.2275620E+4 8.2581130E-2  
1.2275820E+4 7.3801451E-2 1.2275820E+4 8.6505651E-2 1.2275820E+4 9.9328867E-2  
1.2276010E+4 8.7572464E-2 1.2276010E+4 1.0429469E-1 1.2276010E+4 1.1945317E-1  
1.2276200E+4 1.0422466E-1 1.2276200E+4 1.2317934E-1 1.2276200E+4 1.3996482E-1  
1.2276380E+4 1.2285612E-1 1.2276380E+4 1.4393465E-1 1.2276380E+4 1.6399248E-1  
1.2276560E+4 1.4620845E-1 1.2276560E+4 1.7129784E-1 1.2276560E+4 1.9250657E-1  
1.2276740E+4 1.7125315E-1 1.2276740E+4 2.0160941E-1 1.2276740E+4 2.2246465E-1  
1.2276930E+4 2.0065698E-1 1.2276930E+4 2.3110201E-1 1.2276930E+4 2.5779225E-1  
1.2277120E+4 2.3393361E-1 1.2277120E+4 2.6890278E-1 1.2277120E+4 2.9648217E-1  
1.2277310E+4 2.7320641E-1 1.2277310E+4 3.0291756E-1 1.2277310E+4 3.3587174E-1  
1.2277510E+4 3.1525632E-1 1.2277510E+4 3.5407724E-1 1.2277510E+4 3.7957019E-1  
1.2277700E+4 3.5679444E-1 1.2277700E+4 3.8784480E-1 1.2277700E+4 4.1838401E-1  
1.2277880E+4 3.9970555E-1 1.2277880E+4 4.2867227E-1 1.2277880E+4 4.5452066E-1  
1.2278060E+4 4.4246125E-1 1.2278060E+4 4.6629764E-1 1.2278060E+4 4.8679305E-1  
1.2278240E+4 4.8298927E-1 1.2278240E+4 5.0462543E-1 1.2278240E+4 5.1500924E-1  
1.2278450E+4 5.2544710E-1 1.2278450E+4 5.4090759E-1 1.2278450E+4 5.4239919E-1  
1.2278660E+4 5.6100417E-1 1.2278660E+4 5.7017587E-1 1.2278660E+4 5.6788531E-1  
1.2278860E+4 5.8888992E-1 1.2278860E+4 5.9129053E-1 1.2278860E+4 5.8349653E-1  
1.2279060E+4 6.0965031E-1 1.2279060E+4 6.0712320E-1 1.2279060E+4 5.8849500E-1  
1.2279260E+4 6.2123460E-1 1.2279260E+4 6.1332903E-1 1.2279260E+4 5.9156318E-1  
1.2279450E+4 6.2599388E-1 1.2279450E+4 6.1555708E-1 1.2279450E+4 5.9509680E-1  
1.2279640E+4 6.2444860E-1 1.2279640E+4 6.1146794E-1 1.2279640E+4 5.9268198E-1  
1.2279830E+4 6.1705550E-1 1.2279830E+4 6.0278366E-1 1.2279830E+4 5.8230901E-1  
1.2280020E+4 6.0516615E-1 1.2280020E+4 5.9423099E-1 1.2280020E+4 5.7355252E-1  
1.2280210E+4 5.9189157E-1 1.2280210E+4 5.8371586E-1 1.2280210E+4 5.6846361E-1  
1.2280420E+4 5.7591230E-1 1.2280420E+4 5.6924348E-1 1.2280420E+4 5.5805412E-1  
1.2280630E+4 5.5826802E-1 1.2280630E+4 5.5685904E-1 1.2280630E+4 5.4479869E-1  
1.2280830E+4 5.4169228E-1 1.2280830E+4 5.4613853E-1 1.2280830E+4 5.3940953E-1  
1.2281010E+4 5.2863028E-1 1.2281010E+4 5.3812456E-1 1.2281010E+4 5.3631197E-1  
1.2281190E+4 5.2017868E-1 1.2281190E+4 5.3197781E-1 1.2281190E+4 5.3278018E-1  
1.2281370E+4 5.0889709E-1 1.2281370E+4 5.2390465E-1 1.2281370E+4 5.2982740E-1  
1.2281560E+4 5.0277778E-1 1.2281560E+4 5.1921323E-1 1.2281560E+4 5.2747069E-1  
1.2281760E+4 5.0027758E-1 1.2281760E+4 5.1910311E-1 1.2281760E+4 5.3098245E-1  
1.2281970E+4 5.0087215E-1 1.2281970E+4 5.2625011E-1 1.2281970E+4 5.3621614E-1  
1.2282180E+4 5.0669305E-1 1.2282180E+4 5.3008154E-1 1.2282180E+4 5.3995514E-1  
1.2282380E+4 5.1361619E-1 1.2282380E+4 5.3069916E-1 1.2282380E+4 5.4362865E-1  
1.2282580E+4 5.2333167E-1 1.2282580E+4 5.3802086E-1 1.2282580E+4 5.5282994E-1  
1.2282790E+4 5.3700603E-1 1.2282790E+4 5.5553412E-1 1.2282790E+4 5.6677628E-1  
1.2282990E+4 5.5259616E-1 1.2282990E+4 5.6135393E-1 1.2282990E+4 5.7477813E-1  
1.2283180E+4 5.6712646E-1 1.2283180E+4 5.7765205E-1 1.2283180E+4 5.8924981E-1  
1.2283400E+4 5.8707477E-1 1.2283400E+4 5.9426767E-1 1.2283400E+4 6.0341050E-1  
1.2283620E+4 6.0746625E-1 1.2283620E+4 6.1122637E-1 1.2283620E+4 6.1451170E-1  
1.2283840E+4 6.2900380E-1 1.2283840E+4 6.2861222E-1 1.2283840E+4 6.3560963E-1  
1.2284070E+4 6.4958039E-1 1.2284070E+4 6.4459049E-1 1.2284070E+4 6.5061972E-1  
1.2284290E+4 6.7165612E-1 1.2284290E+4 6.6570683E-1 1.2284290E+4 6.6598121E-1  
1.2284490E+4 6.9261770E-1 1.2284490E+4 6.7938263E-1 1.2284490E+4 6.8307039E-1

1.2284680E+4 7.1157758E-1 1.2284680E+4 7.0072434E-1 1.2284680E+4 6.9777369E-1  
1.2284870E+4 7.2822397E-1 1.2284870E+4 7.1230951E-1 1.2284870E+4 7.0885909E-1  
1.2285090E+4 7.4813606E-1 1.2285090E+4 7.3199708E-1 1.2285090E+4 7.2910186E-1  
1.2285300E+4 7.6532536E-1 1.2285300E+4 7.4706049E-1 1.2285300E+4 7.4327990E-1  
1.2285520E+4 7.8644772E-1 1.2285520E+4 7.5908426E-1 1.2285520E+4 7.5717266E-1  
1.2285730E+4 8.0619140E-1 1.2285730E+4 7.7629389E-1 1.2285730E+4 7.7069353E-1  
1.2285940E+4 8.1981925E-1 1.2285940E+4 7.9168529E-1 1.2285940E+4 7.9063869E-1  
1.2286150E+4 8.3237584E-1 1.2286150E+4 8.0607107E-1 1.2286150E+4 8.0489721E-1  
1.2286350E+4 8.4649346E-1 1.2286350E+4 8.1839467E-1 1.2286350E+4 8.1445291E-1  
1.2286540E+4 8.5581182E-1 1.2286540E+4 8.2717706E-1 1.2286540E+4 8.2203658E-1  
1.2286750E+4 8.6729889E-1 1.2286750E+4 8.3782735E-1 1.2286750E+4 8.3360706E-1  
1.2286970E+4 8.7646178E-1 1.2286970E+4 8.5232930E-1 1.2286970E+4 8.4619051E-1  
1.2287190E+4 8.8374597E-1 1.2287190E+4 8.5577527E-1 1.2287190E+4 8.5376047E-1  
1.2287410E+4 8.8968066E-1 1.2287410E+4 8.6583477E-1 1.2287410E+4 8.5855250E-1  
1.2287620E+4 8.9820552E-1 1.2287620E+4 8.6942266E-1 1.2287620E+4 8.6809472E-1  
1.2287830E+4 8.9943697E-1 1.2287830E+4 8.8045221E-1 1.2287830E+4 8.7534210E-1  
1.2288030E+4 9.0111328E-1 1.2288030E+4 8.8393560E-1 1.2288030E+4 8.7977735E-1  
1.2288220E+4 9.0550225E-1 1.2288220E+4 8.8656783E-1 1.2288220E+4 8.8135126E-1  
1.2288410E+4 9.0767873E-1 1.2288410E+4 8.8654581E-1 1.2288410E+4 8.8492454E-1  
1.2288620E+4 9.0915894E-1 1.2288620E+4 8.8909273E-1 1.2288620E+4 8.8665902E-1  
1.2288840E+4 9.0810615E-1 1.2288840E+4 8.9118525E-1 1.2288840E+4 8.8732121E-1  
1.2289040E+4 9.1084129E-1 1.2289040E+4 8.9273431E-1 1.2289040E+4 8.9060890E-1  
1.2289240E+4 9.0915264E-1 1.2289240E+4 8.8883909E-1 1.2289240E+4 8.8739292E-1  
1.2289430E+4 9.1002032E-1 1.2289430E+4 8.9211263E-1 1.2289430E+4 8.9174883E-1  
1.2289620E+4 9.1016075E-1 1.2289620E+4 8.8970159E-1 1.2289620E+4 8.8830831E-1  
1.2289800E+4 9.0947416E-1 1.2289800E+4 8.8972324E-1 1.2289800E+4 8.8964305E-1  
1.2289990E+4 9.1156398E-1 1.2289990E+4 8.8986890E-1 1.2289990E+4 8.8834460E-1  
1.2290170E+4 9.0910368E-1 1.2290170E+4 8.8591680E-1 1.2290170E+4 8.8584932E-1  
1.2290370E+4 9.0969703E-1 1.2290370E+4 8.8690065E-1 1.2290370E+4 8.8581956E-1  
1.2290580E+4 9.1117842E-1 1.2290580E+4 8.8159607E-1 1.2290580E+4 8.8154604E-1  
1.2290780E+4 9.0853429E-1 1.2290780E+4 8.8088918E-1 1.2290780E+4 8.8078237E-1  
1.2290970E+4 9.0830482E-1 1.2290970E+4 8.8018333E-1 1.2290970E+4 8.7954794E-1  
1.2291150E+4 9.0899797E-1 1.2291150E+4 8.7925261E-1 1.2291150E+4 8.7901403E-1  
1.2291340E+4 9.0784717E-1 1.2291340E+4 8.7877824E-1 1.2291340E+4 8.7889775E-1  
1.2291520E+4 9.0909091E-1 1.2291520E+4 8.7458627E-1 1.2291520E+4 8.7710994E-1  
1.2291720E+4 9.0767716E-1 1.2291720E+4 8.7504497E-1 1.2291720E+4 8.7839431E-1  
1.2291930E+4 9.0690280E-1 1.2291930E+4 8.7745662E-1 1.2291930E+4 8.7368842E-1  
1.2292140E+4 9.0733297E-1 1.2292140E+4 8.7527694E-1 1.2292140E+4 8.7742562E-1  
1.2292350E+4 9.1108600E-1 1.2292350E+4 8.7655230E-1 1.2292350E+4 8.7650459E-1  
1.2292550E+4 9.0948828E-1 1.2292550E+4 8.7673388E-1 1.2292550E+4 8.7599881E-1  
1.2292750E+4 9.0996266E-1 1.2292750E+4 8.7435960E-1 1.2292750E+4 8.7366012E-1  
1.2292940E+4 9.1027776E-1 1.2292940E+4 8.7686989E-1 1.2292940E+4 8.7334497E-1  
1.2293130E+4 9.1000531E-1 1.2293130E+4 8.7610441E-1 1.2293130E+4 8.7342937E-1  
1.2293320E+4 9.1162956E-1 1.2293320E+4 8.8166291E-1 1.2293320E+4 8.7971838E-1  
1.2293510E+4 9.1349835E-1 1.2293510E+4 8.8097547E-1 1.2293510E+4 8.8216687E-1  
1.2293720E+4 9.1299461E-1 1.2293720E+4 8.8191334E-1 1.2293720E+4 8.8290505E-1  
1.2293930E+4 9.1371462E-1 1.2293930E+4 8.8687251E-1 1.2293930E+4 8.8617879E-1  
1.2294120E+4 9.1584152E-1 1.2294120E+4 8.8637271E-1 1.2294120E+4 8.8523556E-1  
1.2294310E+4 9.1539690E-1 1.2294310E+4 8.8707234E-1 1.2294310E+4 8.8704179E-1  
1.2294490E+4 9.1635082E-1 1.2294490E+4 8.8875211E-1 1.2294490E+4 8.8625595E-1  
1.2294670E+4 9.1905784E-1 1.2294670E+4 8.8906390E-1 1.2294670E+4 8.8954370E-1  
1.2294860E+4 9.1785728E-1 1.2294860E+4 8.9192353E-1 1.2294860E+4 8.8934740E-1

1.2295060E+4 9.2187292E-1 1.2295060E+4 8.9578666E-1 1.2295060E+4 8.9635552E-1  
1.2295270E+4 9.2151763E-1 1.2295270E+4 9.0038691E-1 1.2295270E+4 8.9877521E-1  
1.2295480E+4 9.2319911E-1 1.2295480E+4 8.9947828E-1 1.2295480E+4 8.9925679E-1  
1.2295690E+4 9.2648467E-1 1.2295690E+4 9.0429775E-1 1.2295690E+4 9.0272724E-1  
1.2295900E+4 9.2847540E-1 1.2295900E+4 9.1064278E-1 1.2295900E+4 9.0968606E-1  
1.2296100E+4 9.3114096E-1 1.2296100E+4 9.1314938E-1 1.2296100E+4 9.1414407E-1  
1.2296300E+4 9.3238448E-1 1.2296300E+4 9.1931327E-1 1.2296300E+4 9.1268376E-1  
1.2296490E+4 9.3345361E-1 1.2296490E+4 9.1796404E-1 1.2296490E+4 9.1960975E-1  
1.2296690E+4 9.3613996E-1 1.2296690E+4 9.2174065E-1 1.2296690E+4 9.2014235E-1  
1.2296900E+4 9.3895808E-1 1.2296900E+4 9.2803265E-1 1.2296900E+4 9.3079241E-1  
1.2297130E+4 9.4128368E-1 1.2297130E+4 9.2698969E-1 1.2297130E+4 9.3060569E-1  
1.2297350E+4 9.4527134E-1 1.2297350E+4 9.3322596E-1 1.2297350E+4 9.3446210E-1  
1.2297550E+4 9.4769693E-1 1.2297550E+4 9.3645005E-1 1.2297550E+4 9.3421537E-1  
1.2297750E+4 9.4953143E-1 1.2297750E+4 9.3960214E-1 1.2297750E+4 9.3931777E-1  
1.2297950E+4 9.5461247E-1 1.2297950E+4 9.4467034E-1 1.2297950E+4 9.4335429E-1  
1.2298140E+4 9.5810241E-1 1.2298140E+4 9.4886972E-1 1.2298140E+4 9.4797667E-1  
1.2298320E+4 9.6085206E-1 1.2298320E+4 9.5154438E-1 1.2298320E+4 9.5128304E-1  
1.2298530E+4 9.5978035E-1 1.2298530E+4 9.5693690E-1 1.2298530E+4 9.5462165E-1  
1.2298740E+4 9.6356448E-1 1.2298740E+4 9.5795635E-1 1.2298740E+4 9.5638069E-1  
1.2298950E+4 9.6757869E-1 1.2298950E+4 9.6179157E-1 1.2298950E+4 9.6344540E-1  
1.2299160E+4 9.7256205E-1 1.2299160E+4 9.6066182E-1 1.2299160E+4 9.6387806E-1  
1.2299370E+4 9.7474042E-1 1.2299370E+4 9.6294407E-1 1.2299370E+4 9.6371030E-1  
1.2299560E+4 9.7702545E-1 1.2299560E+4 9.6901496E-1 1.2299560E+4 9.6619655E-1  
1.2299760E+4 9.7755245E-1 1.2299760E+4 9.6978000E-1 1.2299760E+4 9.7156874E-1  
1.2299950E+4 9.8195313E-1 1.2299950E+4 9.7216788E-1 1.2299950E+4 9.7384941E-1  
1.2300140E+4 9.8557956E-1 1.2300140E+4 9.7441101E-1 1.2300140E+4 9.7514164E-1  
1.2300350E+4 9.8673097E-1 1.2300350E+4 9.7684607E-1 1.2300350E+4 9.7744073E-1  
1.2300570E+4 9.8892709E-1 1.2300570E+4 9.7899154E-1 1.2300570E+4 9.7682683E-1  
1.2300780E+4 9.9180568E-1 1.2300780E+4 9.8259066E-1 1.2300780E+4 9.8448287E-1  
1.2300990E+4 9.9518826E-1 1.2300990E+4 9.8209853E-1 1.2300990E+4 9.8535184E-1  
1.2301180E+4 9.9686963E-1 1.2301180E+4 9.8262394E-1 1.2301180E+4 9.8324758E-1  
1.2301370E+4 9.9976629E-1 1.2301370E+4 9.8879002E-1 1.2301370E+4 9.8708192E-1  
1.2301550E+4 1.0028962E+0 1.2301550E+4 9.9153441E-1 1.2301550E+4 9.8814608E-1  
1.2301750E+4 1.0037706E+0 1.2301750E+4 9.9215847E-1 1.2301750E+4 9.8817275E-1  
1.2301950E+4 1.0074810E+0 1.2301950E+4 9.9200358E-1 1.2301950E+4 9.9365803E-1  
1.2302150E+4 1.0107348E+0 1.2302150E+4 9.9440930E-1 1.2302150E+4 9.9492605E-1  
1.2302350E+4 1.0112666E+0 1.2302350E+4 9.9842724E-1 1.2302350E+4 9.9857220E-1  
1.2302540E+4 1.0099301E+0 1.2302540E+4 9.9708184E-1 1.2302540E+4 9.9759435E-1  
1.2302730E+4 1.0140721E+0 1.2302730E+4 9.9761805E-1 1.2302730E+4 9.9969888E-1  
1.2302910E+4 1.0153111E+0 1.2302910E+4 1.0043973E+0 1.2302910E+4 1.0051498E+0  
1.2303080E+4 1.0195269E+0 1.2303080E+4 1.0065243E+0 1.2303080E+4 1.0054448E+0  
1.2303250E+4 1.0200971E+0 1.2303250E+4 1.0035092E+0 1.2303250E+4 1.0048360E+0  
1.2303430E+4 1.0185228E+0 1.2303430E+4 1.0052280E+0 1.2303430E+4 1.0039629E+0  
1.2303630E+4 1.0213280E+0 1.2303630E+4 1.0094716E+0 1.2303630E+4 1.0099221E+0  
1.2303820E+4 1.0231004E+0 1.2303820E+4 1.0107813E+0 1.2303820E+4 1.0140183E+0  
1.2304020E+4 1.0240214E+0 1.2304020E+4 1.0148599E+0 1.2304020E+4 1.0129196E+0  
1.2304200E+4 1.0274241E+0 1.2304200E+4 1.0159837E+0 1.2304200E+4 1.0181373E+0  
1.2304390E+4 1.0279967E+0 1.2304390E+4 1.0181947E+0 1.2304390E+4 1.0171226E+0  
1.2304570E+4 1.0308721E+0 1.2304570E+4 1.0167171E+0 1.2304570E+4 1.0193482E+0  
1.2304750E+4 1.0311231E+0 1.2304750E+4 1.0212875E+0 1.2304750E+4 1.0202703E+0  
1.2304940E+4 1.0311417E+0 1.2304940E+4 1.0211035E+0 1.2304940E+4 1.0218602E+0  
1.2305140E+4 1.0337938E+0 1.2305140E+4 1.0248477E+0 1.2305140E+4 1.0231891E+0

1.2305350E+4 1.0355928E+0 1.2305350E+4 1.0274555E+0 1.2305350E+4 1.0280810E+0  
1.2305550E+4 1.0376389E+0 1.2305550E+4 1.0282460E+0 1.2305550E+4 1.0286597E+0  
1.2305750E+4 1.0383695E+0 1.2305750E+4 1.0294733E+0 1.2305750E+4 1.0291028E+0  
1.2305950E+4 1.0381760E+0 1.2305950E+4 1.0294983E+0 1.2305950E+4 1.0300486E+0  
1.2306130E+4 1.0402842E+0 1.2306130E+4 1.0281208E+0 1.2306130E+4 1.0289421E+0  
1.2306320E+4 1.0408815E+0 1.2306320E+4 1.0302479E+0 1.2306320E+4 1.0322114E+0  
1.2306500E+4 1.0393849E+0 1.2306500E+4 1.0346889E+0 1.2306500E+4 1.0349157E+0  
1.2306700E+4 1.0419016E+0 1.2306700E+4 1.0323325E+0 1.2306700E+4 1.0337949E+0  
1.2306900E+4 1.0455926E+0 1.2306900E+4 1.0394511E+0 1.2306900E+4 1.0357921E+0  
1.2307100E+4 1.0458352E+0 1.2307100E+4 1.0376006E+0 1.2307100E+4 1.0395452E+0  
1.2307290E+4 1.0456404E+0 1.2307290E+4 1.0318144E+0 1.2307290E+4 1.0380497E+0  
1.2307490E+4 1.0439610E+0 1.2307490E+4 1.0357052E+0 1.2307490E+4 1.0381415E+0  
1.2307660E+4 1.0444915E+0 1.2307660E+4 1.0357481E+0 1.2307660E+4 1.0387292E+0  
1.2307840E+4 1.0447367E+0 1.2307840E+4 1.0340597E+0 1.2307840E+4 1.0410724E+0  
1.2308020E+4 1.0469560E+0 1.2308020E+4 1.0423421E+0 1.2308020E+4 1.0418474E+0  
1.2308230E+4 1.0479360E+0 1.2308230E+4 1.0440164E+0 1.2308230E+4 1.0457655E+0  
1.2308440E+4 1.0489289E+0 1.2308440E+4 1.0398147E+0 1.2308440E+4 1.0416476E+0  
1.2308650E+4 1.0491023E+0 1.2308650E+4 1.0429842E+0 1.2308650E+4 1.0436966E+0  
1.2308860E+4 1.0510714E+0 1.2308860E+4 1.0444561E+0 1.2308860E+4 1.0433662E+0  
1.2309060E+4 1.0516281E+0 1.2309060E+4 1.0416349E+0 1.2309060E+4 1.0433466E+0  
1.2309260E+4 1.0504970E+0 1.2309260E+4 1.0451650E+0 1.2309260E+4 1.0498568E+0  
1.2309450E+4 1.0519267E+0 1.2309450E+4 1.0468830E+0 1.2309450E+4 1.0507207E+0  
1.2309650E+4 1.0535844E+0 1.2309650E+4 1.0451642E+0 1.2309650E+4 1.0472761E+0  
1.2309860E+4 1.0554506E+0 1.2309860E+4 1.0479901E+0 1.2309860E+4 1.0505471E+0  
1.2310070E+4 1.0529553E+0 1.2310070E+4 1.0466841E+0 1.2310070E+4 1.0473655E+0  
1.2310280E+4 1.0516897E+0 1.2310280E+4 1.0518296E+0 1.2310280E+4 1.0527179E+0  
1.2310490E+4 1.0550181E+0 1.2310490E+4 1.0522765E+0 1.2310490E+4 1.0509494E+0  
1.2310700E+4 1.0552147E+0 1.2310700E+4 1.0490501E+0 1.2310700E+4 1.0552099E+0  
1.2310900E+4 1.0546666E+0 1.2310900E+4 1.0490841E+0 1.2310900E+4 1.0511225E+0  
1.2311090E+4 1.0565568E+0 1.2311090E+4 1.0513445E+0 1.2311090E+4 1.0511247E+0  
1.2311280E+4 1.0569458E+0 1.2311280E+4 1.0512524E+0 1.2311280E+4 1.0498556E+0  
1.2311470E+4 1.0583524E+0 1.2311470E+4 1.0503216E+0 1.2311470E+4 1.0504864E+0  
1.2311680E+4 1.0589973E+0 1.2311680E+4 1.0502349E+0 1.2311680E+4 1.0536870E+0  
1.2311890E+4 1.0578307E+0 1.2311890E+4 1.0574966E+0 1.2311890E+4 1.0597565E+0  
1.2312100E+4 1.0612771E+0 1.2312100E+4 1.0530381E+0 1.2312100E+4 1.0515465E+0  
1.2312310E+4 1.0583342E+0 1.2312310E+4 1.0498151E+0 1.2312310E+4 1.0498404E+0  
1.2312500E+4 1.0607247E+0 1.2312500E+4 1.0535068E+0 1.2312500E+4 1.0550100E+0  
1.2312700E+4 1.0608237E+0 1.2312700E+4 1.0537915E+0 1.2312700E+4 1.0551839E+0  
1.2312890E+4 1.0606250E+0 1.2312890E+4 1.0567407E+0 1.2312890E+4 1.0598669E+0  
1.2313080E+4 1.0604797E+0 1.2313080E+4 1.0555459E+0 1.2313080E+4 1.0582232E+0  
1.2313290E+4 1.0608194E+0 1.2313290E+4 1.0561034E+0 1.2313290E+4 1.0576325E+0  
1.2313510E+4 1.0626543E+0 1.2313510E+4 1.0608299E+0 1.2313510E+4 1.0570141E+0  
1.2313720E+4 1.0614973E+0 1.2313720E+4 1.0547622E+0 1.2313720E+4 1.0525015E+0  
1.2313930E+4 1.0615724E+0 1.2313930E+4 1.0611738E+0 1.2313930E+4 1.0589063E+0  
1.2314140E+4 1.0634545E+0 1.2314140E+4 1.0527912E+0 1.2314140E+4 1.0579874E+0  
1.2314340E+4 1.0633075E+0 1.2314340E+4 1.0571714E+0 1.2314340E+4 1.0579912E+0  
1.2314530E+4 1.0655103E+0 1.2314530E+4 1.0540081E+0 1.2314530E+4 1.0554318E+0  
1.2314720E+4 1.0624093E+0 1.2314720E+4 1.0555371E+0 1.2314720E+4 1.0536615E+0  
1.2314910E+4 1.0643318E+0 1.2314910E+4 1.0577651E+0 1.2314910E+4 1.0583076E+0  
1.2315120E+4 1.0650320E+0 1.2315120E+4 1.0610601E+0 1.2315120E+4 1.0606657E+0  
1.2315330E+4 1.0649497E+0 1.2315330E+4 1.0545344E+0 1.2315330E+4 1.0542046E+0  
1.2315530E+4 1.0681747E+0 1.2315530E+4 1.0604134E+0 1.2315530E+4 1.0588403E+0

1.2315720E+4 1.0668460E+0 1.2315720E+4 1.0593349E+0 1.2315720E+4 1.0566772E+0  
1.2315910E+4 1.0654559E+0 1.2315910E+4 1.0587319E+0 1.2315910E+4 1.0578815E+0  
1.2316100E+4 1.0659645E+0 1.2316100E+4 1.0559295E+0 1.2316100E+4 1.0588462E+0  
1.2316270E+4 1.0660928E+0 1.2316270E+4 1.0578639E+0 1.2316270E+4 1.0609104E+0  
1.2316450E+4 1.0655149E+0 1.2316450E+4 1.0569094E+0 1.2316450E+4 1.0597303E+0  
1.2316640E+4 1.0657043E+0 1.2316640E+4 1.0538742E+0 1.2316640E+4 1.0567046E+0  
1.2316840E+4 1.0669489E+0 1.2316840E+4 1.0557964E+0 1.2316840E+4 1.0580184E+0  
1.2317040E+4 1.0665236E+0 1.2317040E+4 1.0592964E+0 1.2317040E+4 1.0555977E+0  
1.2317240E+4 1.0643574E+0 1.2317240E+4 1.0573375E+0 1.2317240E+4 1.0584579E+0  
1.2317430E+4 1.0643750E+0 1.2317430E+4 1.0561326E+0 1.2317430E+4 1.0544641E+0  
1.2317620E+4 1.0682484E+0 1.2317620E+4 1.0552471E+0 1.2317620E+4 1.0540099E+0  
1.2317800E+4 1.0678376E+0 1.2317800E+4 1.0546872E+0 1.2317800E+4 1.0568012E+0  
1.2317990E+4 1.0666380E+0 1.2317990E+4 1.0587997E+0 1.2317990E+4 1.0565745E+0  
1.2318180E+4 1.0652277E+0 1.2318180E+4 1.0584616E+0 1.2318180E+4 1.0572172E+0  
1.2318400E+4 1.0676150E+0 1.2318400E+4 1.0552683E+0 1.2318400E+4 1.0533336E+0  
1.2318620E+4 1.0646567E+0 1.2318620E+4 1.0556129E+0 1.2318620E+4 1.0528752E+0  
1.2318820E+4 1.0669529E+0 1.2318820E+4 1.0553526E+0 1.2318820E+4 1.0563164E+0  
1.2319030E+4 1.0683354E+0 1.2319030E+4 1.0555901E+0 1.2319030E+4 1.0555997E+0  
1.2319220E+4 1.0682470E+0 1.2319220E+4 1.0568421E+0 1.2319220E+4 1.0541593E+0  
1.2319420E+4 1.0649961E+0 1.2319420E+4 1.0525890E+0 1.2319420E+4 1.0525904E+0  
1.2319600E+4 1.0661306E+0 1.2319600E+4 1.0523490E+0 1.2319600E+4 1.0502124E+0  
1.2319780E+4 1.0671617E+0 1.2319780E+4 1.0561465E+0 1.2319780E+4 1.0528993E+0  
1.2319990E+4 1.0675987E+0 1.2319990E+4 1.0545286E+0 1.2319990E+4 1.0502966E+0  
1.2320210E+4 1.0657644E+0 1.2320210E+4 1.0542352E+0 1.2320210E+4 1.0538727E+0  
1.2320420E+4 1.0656306E+0 1.2320420E+4 1.0542575E+0 1.2320420E+4 1.0543509E+0  
1.2320620E+4 1.0657835E+0 1.2320620E+4 1.0515429E+0 1.2320620E+4 1.0513684E+0  
1.2320810E+4 1.0650045E+0 1.2320810E+4 1.0549824E+0 1.2320810E+4 1.0526848E+0  
1.2321000E+4 1.0643513E+0 1.2321000E+4 1.0534052E+0 1.2321000E+4 1.0536683E+0  
1.2321180E+4 1.0653701E+0 1.2321180E+4 1.0524770E+0 1.2321180E+4 1.0525957E+0  
1.2321370E+4 1.0654267E+0 1.2321370E+4 1.0502871E+0 1.2321370E+4 1.0507436E+0  
1.2321580E+4 1.0651999E+0 1.2321580E+4 1.0471337E+0 1.2321580E+4 1.0491078E+0  
1.2321800E+4 1.0642046E+0 1.2321800E+4 1.0520677E+0 1.2321800E+4 1.0494111E+0  
1.2322010E+4 1.0632502E+0 1.2322010E+4 1.0510751E+0 1.2322010E+4 1.0505500E+0  
1.2322220E+4 1.0641947E+0 1.2322220E+4 1.0523456E+0 1.2322220E+4 1.0496487E+0  
1.2322430E+4 1.0646117E+0 1.2322430E+4 1.0503729E+0 1.2322430E+4 1.0513939E+0  
1.2322640E+4 1.0655172E+0 1.2322640E+4 1.0456988E+0 1.2322640E+4 1.0481987E+0  
1.2322850E+4 1.0656824E+0 1.2322850E+4 1.0492467E+0 1.2322850E+4 1.0487528E+0  
1.2323050E+4 1.0638913E+0 1.2323050E+4 1.0530741E+0 1.2323050E+4 1.0519807E+0  
1.2323260E+4 1.0631555E+0 1.2323260E+4 1.0503809E+0 1.2323260E+4 1.0495863E+0  
1.2323490E+4 1.0642693E+0 1.2323490E+4 1.0497187E+0 1.2323490E+4 1.0472493E+0  
1.2323720E+4 1.0660030E+0 1.2323720E+4 1.0491949E+0 1.2323720E+4 1.0504569E+0  
1.2323930E+4 1.0638850E+0 1.2323930E+4 1.0471777E+0 1.2323930E+4 1.0479257E+0  
1.2324150E+4 1.0621810E+0 1.2324150E+4 1.0486014E+0 1.2324150E+4 1.0465676E+0  
1.2324360E+4 1.0643778E+0 1.2324360E+4 1.0517616E+0 1.2324360E+4 1.0473377E+0  
1.2324550E+4 1.0649518E+0 1.2324550E+4 1.0508483E+0 1.2324550E+4 1.0486306E+0  
1.2324750E+4 1.0625540E+0 1.2324750E+4 1.0441300E+0 1.2324750E+4 1.0457839E+0  
1.2324940E+4 1.0618403E+0 1.2324940E+4 1.0445133E+0 1.2324940E+4 1.0431203E+0  
1.2325160E+4 1.0608904E+0 1.2325160E+4 1.0416983E+0 1.2325160E+4 1.0426354E+0  
1.2325370E+4 1.0596971E+0 1.2325370E+4 1.0439094E+0 1.2325370E+4 1.0429534E+0  
1.2325590E+4 1.0585991E+0 1.2325590E+4 1.0409169E+0 1.2325590E+4 1.0411313E+0  
1.2325800E+4 1.0605401E+0 1.2325800E+4 1.0441240E+0 1.2325800E+4 1.0412313E+0  
1.2326010E+4 1.0602127E+0 1.2326010E+4 1.0404287E+0 1.2326010E+4 1.0429485E+0



|              |              |              |              |              |              |
|--------------|--------------|--------------|--------------|--------------|--------------|
| 1.2326210E+4 | 1.0645240E+0 | 1.2326210E+4 | 1.0417771E+0 | 1.2326210E+4 | 1.0457100E+0 |
| 1.2326410E+4 | 1.0612836E+0 | 1.2326410E+4 | 1.0403964E+0 | 1.2326410E+4 | 1.0404929E+0 |
| 1.2326610E+4 | 1.0582067E+0 | 1.2326610E+4 | 1.0413702E+0 | 1.2326610E+4 | 1.0411350E+0 |
| 1.2326820E+4 | 1.0561057E+0 | 1.2326820E+4 | 1.0389990E+0 | 1.2326820E+4 | 1.0390552E+0 |
| 1.2327040E+4 | 1.0574546E+0 | 1.2327040E+4 | 1.0391685E+0 | 1.2327040E+4 | 1.0372597E+0 |
| 1.2327260E+4 | 1.0575888E+0 | 1.2327260E+4 | 1.0374523E+0 | 1.2327260E+4 | 1.0373250E+0 |
| 1.2327480E+4 | 1.0578091E+0 | 1.2327480E+4 | 1.0398140E+0 | 1.2327480E+4 | 1.0379171E+0 |
| 1.2327700E+4 | 1.0547802E+0 | 1.2327700E+4 | 1.0329070E+0 | 1.2327700E+4 | 1.0377264E+0 |
| 1.2327890E+4 | 1.0534798E+0 | 1.2327890E+4 | 1.0349819E+0 | 1.2327890E+4 | 1.0374485E+0 |
| 1.2328080E+4 | 1.0520322E+0 | 1.2328080E+4 | 1.0401586E+0 | 1.2328080E+4 | 1.0345275E+0 |
| 1.2328270E+4 | 1.0525811E+0 | 1.2328270E+4 | 1.0373616E+0 | 1.2328270E+4 | 1.0294655E+0 |
| 1.2328460E+4 | 1.0532707E+0 | 1.2328460E+4 | 1.0315002E+0 | 1.2328460E+4 | 1.0299086E+0 |
| 1.2328670E+4 | 1.0514417E+0 | 1.2328670E+4 | 1.0327738E+0 | 1.2328670E+4 | 1.0302335E+0 |
| 1.2328870E+4 | 1.0503664E+0 | 1.2328870E+4 | 1.0328348E+0 | 1.2328870E+4 | 1.0331360E+0 |
| 1.2329080E+4 | 1.0494090E+0 | 1.2329080E+4 | 1.0343836E+0 | 1.2329080E+4 | 1.0310853E+0 |
| 1.2329280E+4 | 1.0465750E+0 | 1.2329280E+4 | 1.0289696E+0 | 1.2329280E+4 | 1.0260805E+0 |
| 1.2329470E+4 | 1.0473603E+0 | 1.2329470E+4 | 1.0288769E+0 | 1.2329470E+4 | 1.0284173E+0 |
| 1.2329650E+4 | 1.0473585E+0 | 1.2329650E+4 | 1.0311840E+0 | 1.2329650E+4 | 1.0286758E+0 |
| 1.2329830E+4 | 1.0469323E+0 | 1.2329830E+4 | 1.0309013E+0 | 1.2329830E+4 | 1.0266893E+0 |
| 1.2330010E+4 | 1.0495209E+0 | 1.2330010E+4 | 1.0270198E+0 | 1.2330010E+4 | 1.0265278E+0 |
| 1.2330210E+4 | 1.0441734E+0 | 1.2330210E+4 | 1.0264637E+0 | 1.2330210E+4 | 1.0258431E+0 |
| 1.2330410E+4 | 1.0440534E+0 | 1.2330410E+4 | 1.0238777E+0 | 1.2330410E+4 | 1.0229662E+0 |
| 1.2330610E+4 | 1.0426506E+0 | 1.2330610E+4 | 1.0213293E+0 | 1.2330610E+4 | 1.0204641E+0 |
| 1.2330820E+4 | 1.0443637E+0 | 1.2330820E+4 | 1.0234224E+0 | 1.2330820E+4 | 1.0216481E+0 |
| 1.2331010E+4 | 1.0416760E+0 | 1.2331010E+4 | 1.0198253E+0 | 1.2331010E+4 | 1.0174766E+0 |
| 1.2331200E+4 | 1.0419871E+0 | 1.2331200E+4 | 1.0207837E+0 | 1.2331200E+4 | 1.0190448E+0 |
| 1.2331380E+4 | 1.0409510E+0 | 1.2331380E+4 | 1.0246004E+0 | 1.2331380E+4 | 1.0228640E+0 |
| 1.2331560E+4 | 1.0409314E+0 | 1.2331560E+4 | 1.0235545E+0 | 1.2331560E+4 | 1.0190192E+0 |
| 1.2331780E+4 | 1.0392725E+0 | 1.2331780E+4 | 1.0177817E+0 | 1.2331780E+4 | 1.0181040E+0 |
| 1.2331990E+4 | 1.0368723E+0 | 1.2331990E+4 | 1.0178900E+0 | 1.2331990E+4 | 1.0163520E+0 |
| 1.2332200E+4 | 1.0372093E+0 | 1.2332200E+4 | 1.0153117E+0 | 1.2332200E+4 | 1.0172486E+0 |
| 1.2332400E+4 | 1.0378825E+0 | 1.2332400E+4 | 1.0143005E+0 | 1.2332400E+4 | 1.0151469E+0 |
| 1.2332600E+4 | 1.0338191E+0 | 1.2332600E+4 | 1.0186236E+0 | 1.2332600E+4 | 1.0141522E+0 |
| 1.2332800E+4 | 1.0336404E+0 | 1.2332800E+4 | 1.0135313E+0 | 1.2332800E+4 | 1.0122373E+0 |
| 1.2332990E+4 | 1.0323557E+0 | 1.2332990E+4 | 1.0105715E+0 | 1.2332990E+4 | 1.0087994E+0 |
| 1.2333170E+4 | 1.0322902E+0 | 1.2333170E+4 | 1.0106408E+0 | 1.2333170E+4 | 1.0112759E+0 |
| 1.2333360E+4 | 1.0323339E+0 | 1.2333360E+4 | 1.0061074E+0 | 1.2333360E+4 | 1.0044337E+0 |
| 1.2333560E+4 | 1.0319215E+0 | 1.2333560E+4 | 1.0057464E+0 | 1.2333560E+4 | 1.0041246E+0 |
| 1.2333760E+4 | 1.0298286E+0 | 1.2333760E+4 | 1.0051623E+0 | 1.2333760E+4 | 1.0055600E+0 |
| 1.2333970E+4 | 1.0306657E+0 | 1.2333970E+4 | 1.0055712E+0 | 1.2333970E+4 | 1.0068441E+0 |
| 1.2334160E+4 | 1.0284425E+0 | 1.2334160E+4 | 1.0128530E+0 | 1.2334160E+4 | 1.0087460E+0 |
| 1.2334350E+4 | 1.0272418E+0 | 1.2334350E+4 | 1.0066115E+0 | 1.2334350E+4 | 1.0056910E+0 |
| 1.2334530E+4 | 1.0274471E+0 | 1.2334530E+4 | 1.0055893E+0 | 1.2334530E+4 | 1.0012200E+0 |
| 1.2334710E+4 | 1.0254895E+0 | 1.2334710E+4 | 1.0096957E+0 | 1.2334710E+4 | 1.0057211E+0 |
| 1.2334900E+4 | 1.0263488E+0 | 1.2334900E+4 | 1.0062994E+0 | 1.2334900E+4 | 1.0076563E+0 |
| 1.2335110E+4 | 1.0266124E+0 | 1.2335110E+4 | 1.0030083E+0 | 1.2335110E+4 | 1.0030602E+0 |
| 1.2335320E+4 | 1.0234620E+0 | 1.2335320E+4 | 1.0005667E+0 | 1.2335320E+4 | 1.0047334E+0 |
| 1.2335540E+4 | 1.0240463E+0 | 1.2335540E+4 | 1.0041494E+0 | 1.2335540E+4 | 1.0010849E+0 |
| 1.2335750E+4 | 1.0208211E+0 | 1.2335750E+4 | 9.9867785E-1 | 1.2335750E+4 | 9.9823857E-1 |
| 1.2335960E+4 | 1.0189343E+0 | 1.2335960E+4 | 1.0014430E+0 | 1.2335960E+4 | 9.9926917E-1 |
| 1.2336160E+4 | 1.0192068E+0 | 1.2336160E+4 | 9.9964700E-1 | 1.2336160E+4 | 9.9753945E-1 |
| 1.2336360E+4 | 1.0201388E+0 | 1.2336360E+4 | 1.0000941E+0 | 1.2336360E+4 | 9.9591291E-1 |

|                           |                           |                           |
|---------------------------|---------------------------|---------------------------|
| 1.2336560E+4 1.0189816E+0 | 1.2336560E+4 9.9821664E-1 | 1.2336560E+4 9.9542987E-1 |
| 1.2336760E+4 1.0175689E+0 | 1.2336760E+4 9.9768197E-1 | 1.2336760E+4 9.9397788E-1 |
| 1.2336980E+4 1.0129309E+0 | 1.2336980E+4 9.9475454E-1 | 1.2336980E+4 9.9405720E-1 |
| 1.2337200E+4 1.0124510E+0 | 1.2337200E+4 9.9272140E-1 | 1.2337200E+4 9.9590253E-1 |
| 1.2337410E+4 1.0138346E+0 | 1.2337410E+4 9.9145871E-1 | 1.2337410E+4 9.9371052E-1 |
| 1.2337620E+4 1.0135358E+0 | 1.2337620E+4 9.9026165E-1 | 1.2337620E+4 9.9195160E-1 |
| 1.2337810E+4 1.0144906E+0 | 1.2337810E+4 9.9356114E-1 | 1.2337810E+4 9.9672924E-1 |
| 1.2338010E+4 1.0129975E+0 | 1.2338010E+4 9.9057964E-1 | 1.2338010E+4 9.9220122E-1 |
| 1.2338190E+4 1.0115725E+0 | 1.2338190E+4 9.8672505E-1 | 1.2338190E+4 9.8934959E-1 |
| 1.2338390E+4 1.0095931E+0 | 1.2338390E+4 9.9169796E-1 | 1.2338390E+4 9.8812710E-1 |
| 1.2338590E+4 1.0091301E+0 | 1.2338590E+4 9.9102405E-1 | 1.2338590E+4 9.8921418E-1 |
| 1.2338800E+4 1.0097937E+0 | 1.2338800E+4 9.8660095E-1 | 1.2338800E+4 9.8385201E-1 |
| 1.2339010E+4 1.0086561E+0 | 1.2339010E+4 9.8752635E-1 | 1.2339010E+4 9.8729146E-1 |
| 1.2339210E+4 1.0070642E+0 | 1.2339210E+4 9.9209235E-1 | 1.2339210E+4 9.8785233E-1 |
| 1.2339420E+4 1.0060965E+0 | 1.2339420E+4 9.8253112E-1 | 1.2339420E+4 9.8429783E-1 |
| 1.2339620E+4 1.0054891E+0 | 1.2339620E+4 9.8514775E-1 | 1.2339620E+4 9.8804048E-1 |
| 1.2339810E+4 1.0045933E+0 | 1.2339810E+4 9.8610096E-1 | 1.2339810E+4 9.8456681E-1 |
| 1.2340000E+4 1.0028930E+0 | 1.2340000E+4 9.8712625E-1 | 1.2340000E+4 9.8332471E-1 |
| 1.2340210E+4 1.0052281E+0 | 1.2340210E+4 9.8031951E-1 | 1.2340210E+4 9.8007715E-1 |
| 1.2340410E+4 1.0041829E+0 | 1.2340410E+4 9.8271394E-1 | 1.2340410E+4 9.7742952E-1 |
| 1.2340630E+4 1.0023744E+0 | 1.2340630E+4 9.8330975E-1 | 1.2340630E+4 9.8544344E-1 |
| 1.2340840E+4 1.0019695E+0 | 1.2340840E+4 9.8292584E-1 | 1.2340840E+4 9.8134029E-1 |
| 1.2341040E+4 1.0007605E+0 | 1.2341040E+4 9.8622967E-1 | 1.2341040E+4 9.8437025E-1 |
| 1.2341230E+4 9.9904455E-1 | 1.2341230E+4 9.8346472E-1 | 1.2341230E+4 9.8386855E-1 |
| 1.2341420E+4 9.9841996E-1 | 1.2341420E+4 9.7972353E-1 | 1.2341420E+4 9.8000008E-1 |
| 1.2341600E+4 1.0013552E+0 | 1.2341600E+4 9.8046093E-1 | 1.2341600E+4 9.8156929E-1 |
| 1.2341790E+4 9.9835459E-1 | 1.2341790E+4 9.8156279E-1 | 1.2341790E+4 9.8283162E-1 |
| 1.2341980E+4 9.9964437E-1 | 1.2341980E+4 9.8051423E-1 | 1.2341980E+4 9.8273133E-1 |
| 1.2342190E+4 9.9706640E-1 | 1.2342190E+4 9.7906667E-1 | 1.2342190E+4 9.7758266E-1 |
| 1.2342390E+4 9.9784751E-1 | 1.2342390E+4 9.7526095E-1 | 1.2342390E+4 9.7844384E-1 |
| 1.2342580E+4 9.9510461E-1 | 1.2342580E+4 9.7666481E-1 | 1.2342580E+4 9.7651009E-1 |
| 1.2342770E+4 9.9830377E-1 | 1.2342770E+4 9.7975727E-1 | 1.2342770E+4 9.7898445E-1 |
| 1.2342950E+4 9.9664689E-1 | 1.2342950E+4 9.7327629E-1 | 1.2342950E+4 9.7654840E-1 |
| 1.2343130E+4 9.9561455E-1 | 1.2343130E+4 9.7830861E-1 | 1.2343130E+4 9.7823322E-1 |
| 1.2343310E+4 9.9525900E-1 | 1.2343310E+4 9.8146132E-1 | 1.2343310E+4 9.7595974E-1 |
| 1.2343500E+4 9.9628672E-1 | 1.2343500E+4 9.7418018E-1 | 1.2343500E+4 9.7795439E-1 |
| 1.2343690E+4 9.9464939E-1 | 1.2343690E+4 9.8101915E-1 | 1.2343690E+4 9.8176950E-1 |
| 1.2343900E+4 9.9226039E-1 | 1.2343900E+4 9.7748250E-1 | 1.2343900E+4 9.7810173E-1 |
| 1.2344110E+4 9.9680889E-1 | 1.2344110E+4 9.8471097E-1 | 1.2344110E+4 9.8068837E-1 |
| 1.2344310E+4 9.9712347E-1 | 1.2344310E+4 9.7918895E-1 | 1.2344310E+4 9.7785390E-1 |
| 1.2344500E+4 9.9306113E-1 | 1.2344500E+4 9.8250233E-1 | 1.2344500E+4 9.7875269E-1 |
| 1.2344680E+4 9.9204686E-1 | 1.2344680E+4 9.7774683E-1 | 1.2344680E+4 9.7300106E-1 |
| 1.2344860E+4 9.9089516E-1 | 1.2344860E+4 9.7904017E-1 | 1.2344860E+4 9.7777919E-1 |
| 1.2345060E+4 9.9194423E-1 | 1.2345060E+4 9.7704088E-1 | 1.2345060E+4 9.8055791E-1 |
| 1.2345280E+4 9.9274516E-1 | 1.2345280E+4 9.8018596E-1 | 1.2345280E+4 9.7742813E-1 |
| 1.2345500E+4 9.9230412E-1 | 1.2345500E+4 9.7638891E-1 | 1.2345500E+4 9.7705199E-1 |
| 1.2345710E+4 9.9322451E-1 | 1.2345710E+4 9.7778733E-1 | 1.2345710E+4 9.7620503E-1 |
| 1.2345910E+4 9.9272763E-1 | 1.2345910E+4 9.8461807E-1 | 1.2345910E+4 9.8399346E-1 |
| 1.2346110E+4 9.9268105E-1 | 1.2346110E+4 9.7791740E-1 | 1.2346110E+4 9.8022676E-1 |
| 1.2346290E+4 9.9302454E-1 | 1.2346290E+4 9.7792754E-1 | 1.2346290E+4 9.7509184E-1 |
| 1.2346480E+4 9.9321681E-1 | 1.2346480E+4 9.7679924E-1 | 1.2346480E+4 9.7522117E-1 |
| 1.2346670E+4 9.9450929E-1 | 1.2346670E+4 9.7818980E-1 | 1.2346670E+4 9.7945529E-1 |

|                           |                           |                           |
|---------------------------|---------------------------|---------------------------|
| 1.2346870E+4 9.9293896E-1 | 1.2346870E+4 9.7964870E-1 | 1.2346870E+4 9.8169704E-1 |
| 1.2347070E+4 9.8947737E-1 | 1.2347070E+4 9.7888243E-1 | 1.2347070E+4 9.7733161E-1 |
| 1.2347270E+4 9.9185641E-1 | 1.2347270E+4 9.8075624E-1 | 1.2347270E+4 9.7651833E-1 |
| 1.2347460E+4 9.9243095E-1 | 1.2347460E+4 9.8317900E-1 | 1.2347460E+4 9.8173540E-1 |
| 1.2347650E+4 9.9074424E-1 | 1.2347650E+4 9.8214815E-1 | 1.2347650E+4 9.8283047E-1 |
| 1.2347840E+4 9.9355198E-1 | 1.2347840E+4 9.8125352E-1 | 1.2347840E+4 9.8218139E-1 |
| 1.2348020E+4 9.9288781E-1 | 1.2348020E+4 9.8280781E-1 | 1.2348020E+4 9.8311773E-1 |
| 1.2348210E+4 9.9149136E-1 | 1.2348210E+4 9.8129670E-1 | 1.2348210E+4 9.8179521E-1 |
| 1.2348420E+4 9.9419959E-1 | 1.2348420E+4 9.7949782E-1 | 1.2348420E+4 9.8147800E-1 |
| 1.2348630E+4 9.9135333E-1 | 1.2348630E+4 9.8303853E-1 | 1.2348630E+4 9.8023942E-1 |
| 1.2348860E+4 9.9387122E-1 | 1.2348860E+4 9.8043237E-1 | 1.2348860E+4 9.8144727E-1 |
| 1.2349070E+4 9.9199231E-1 | 1.2349070E+4 9.8115537E-1 | 1.2349070E+4 9.8296879E-1 |
| 1.2349280E+4 9.9212956E-1 | 1.2349280E+4 9.8052671E-1 | 1.2349280E+4 9.8209890E-1 |
| 1.2349490E+4 9.9509037E-1 | 1.2349490E+4 9.8579353E-1 | 1.2349490E+4 9.8439616E-1 |
| 1.2349680E+4 9.9243445E-1 | 1.2349680E+4 9.8253638E-1 | 1.2349680E+4 9.7971767E-1 |
| 1.2349890E+4 9.9331037E-1 | 1.2349890E+4 9.8623289E-1 | 1.2349890E+4 9.8666731E-1 |
| 1.2350090E+4 9.9482356E-1 | 1.2350090E+4 9.8505086E-1 | 1.2350090E+4 9.8262646E-1 |
| 1.2350300E+4 9.9398328E-1 | 1.2350300E+4 9.8327961E-1 | 1.2350300E+4 9.8473528E-1 |
| 1.2350530E+4 9.9600321E-1 | 1.2350530E+4 9.8541907E-1 | 1.2350530E+4 9.8643845E-1 |
| 1.2350740E+4 9.9494426E-1 | 1.2350740E+4 9.8156681E-1 | 1.2350740E+4 9.8622522E-1 |
| 1.2350950E+4 9.9563721E-1 | 1.2350950E+4 9.8590313E-1 | 1.2350950E+4 9.8824698E-1 |
| 1.2351160E+4 9.9382787E-1 | 1.2351160E+4 9.8599556E-1 | 1.2351160E+4 9.8858092E-1 |
| 1.2351360E+4 9.9640713E-1 | 1.2351360E+4 9.8635748E-1 | 1.2351360E+4 9.8937597E-1 |
| 1.2351550E+4 9.9519387E-1 | 1.2351550E+4 9.8790327E-1 | 1.2351550E+4 9.9279249E-1 |
| 1.2351740E+4 9.9299445E-1 | 1.2351740E+4 9.8756443E-1 | 1.2351740E+4 9.8966154E-1 |
| 1.2351960E+4 9.9621487E-1 | 1.2351960E+4 9.9100936E-1 | 1.2351960E+4 9.8785156E-1 |
| 1.2352180E+4 9.9968776E-1 | 1.2352180E+4 9.9035569E-1 | 1.2352180E+4 9.9072385E-1 |
| 1.2352400E+4 9.9922425E-1 | 1.2352400E+4 9.9284900E-1 | 1.2352400E+4 9.9559576E-1 |
| 1.2352620E+4 9.9681556E-1 | 1.2352620E+4 9.9474020E-1 | 1.2352620E+4 9.8985442E-1 |
| 1.2352820E+4 9.9634893E-1 | 1.2352820E+4 9.9835969E-1 | 1.2352820E+4 9.9690266E-1 |
| 1.2353030E+4 9.9670803E-1 | 1.2353030E+4 9.9216016E-1 | 1.2353030E+4 9.9761034E-1 |
| 1.2353230E+4 9.9752032E-1 | 1.2353230E+4 9.9243256E-1 | 1.2353230E+4 9.9576073E-1 |
| 1.2353420E+4 9.9705096E-1 | 1.2353420E+4 9.9578970E-1 | 1.2353420E+4 9.9503840E-1 |
| 1.2353620E+4 9.9778566E-1 | 1.2353620E+4 9.9623553E-1 | 1.2353620E+4 9.9591187E-1 |
| 1.2353840E+4 9.9985016E-1 | 1.2353840E+4 9.9625804E-1 | 1.2353840E+4 9.9764633E-1 |
| 1.2354060E+4 9.9781150E-1 | 1.2354060E+4 9.9860486E-1 | 1.2354060E+4 9.9224776E-1 |
| 1.2354290E+4 1.0003358E+0 | 1.2354290E+4 9.9831207E-1 | 1.2354290E+4 9.9644384E-1 |
| 1.2354500E+4 1.0002729E+0 | 1.2354500E+4 9.9827390E-1 | 1.2354500E+4 9.9836835E-1 |
| 1.2354690E+4 1.0009214E+0 | 1.2354690E+4 9.9800786E-1 | 1.2354690E+4 9.9974658E-1 |
| 1.2354890E+4 1.0012992E+0 | 1.2354890E+4 9.9644333E-1 | 1.2354890E+4 9.9826318E-1 |
| 1.2355070E+4 1.0000086E+0 | 1.2355070E+4 9.9656321E-1 | 1.2355070E+4 9.9943193E-1 |
| 1.2355270E+4 9.9885785E-1 | 1.2355270E+4 1.0014159E+0 | 1.2355270E+4 1.0028662E+0 |
| 1.2355470E+4 1.0003480E+0 | 1.2355470E+4 9.9937360E-1 | 1.2355470E+4 9.9775050E-1 |
| 1.2355680E+4 1.0009893E+0 | 1.2355680E+4 9.9984666E-1 | 1.2355680E+4 9.9863572E-1 |
| 1.2355890E+4 1.0002001E+0 | 1.2355890E+4 1.0032062E+0 | 1.2355890E+4 1.0004873E+0 |
| 1.2356080E+4 1.0014147E+0 | 1.2356080E+4 1.0022079E+0 | 1.2356080E+4 1.0009022E+0 |
| 1.2356280E+4 1.0033571E+0 | 1.2356280E+4 1.0031780E+0 | 1.2356280E+4 1.0060698E+0 |
| 1.2356470E+4 1.0036077E+0 | 1.2356470E+4 1.0016097E+0 | 1.2356470E+4 1.0012426E+0 |

**Hg(Cys)<sub>2</sub>**

1.2258820E+4 8.3837000E-5  
1.2258840E+4 3.3173000E-4

**β-HgS nano**

1.2258820E+4 7.4837000E-4  
1.2258840E+4 9.3373000E-4

**Hg(D-Pen)<sub>3</sub>**

1.2258820E+4 1.4094051E-3  
1.2258840E+4 1.4469796E-3

|              |              |              |              |              |              |
|--------------|--------------|--------------|--------------|--------------|--------------|
| 1.2258980E+4 | 2.1279000E-4 | 1.2258980E+4 | 1.0480111E-3 | 1.2258980E+4 | 1.5649153E-3 |
| 1.2259200E+4 | 1.0806131E-4 | 1.2259200E+4 | 1.0746625E-3 | 1.2259200E+4 | 1.7787419E-3 |
| 1.2259410E+4 | 3.3996248E-4 | 1.2259410E+4 | 7.9168076E-4 | 1.2259410E+4 | 2.7566629E-3 |
| 1.2259620E+4 | 1.2829205E-5 | 1.2259620E+4 | 1.0113411E-3 | 1.2259620E+4 | 3.2614877E-3 |
| 1.2259820E+4 | 9.3999756E-5 | 1.2259820E+4 | 7.1882701E-4 | 1.2259820E+4 | 2.1856813E-3 |
| 1.2260020E+4 | 1.1576236E-4 | 1.2260020E+4 | 1.5482408E-3 | 1.2260020E+4 | 3.2974770E-3 |
| 1.2260210E+4 | 1.0606810E-4 | 1.2260210E+4 | 1.7437281E-3 | 1.2260210E+4 | 2.6823506E-3 |
| 1.2260400E+4 | 2.1074166E-4 | 1.2260400E+4 | 1.5301288E-3 | 1.2260400E+4 | 3.5986510E-3 |
| 1.2260590E+4 | 2.0437958E-4 | 1.2260590E+4 | 1.5656518E-3 | 1.2260590E+4 | 3.2185234E-3 |
| 1.2260800E+4 | 2.2199840E-4 | 1.2260800E+4 | 1.1236553E-3 | 1.2260800E+4 | 2.0690490E-3 |
| 1.2261020E+4 | 4.1591612E-4 | 1.2261020E+4 | 1.1639942E-3 | 1.2261020E+4 | 2.1650826E-3 |
| 1.2261230E+4 | 3.5458021E-4 | 1.2261230E+4 | 2.3113683E-3 | 1.2261230E+4 | 2.5409028E-3 |
| 1.2261440E+4 | 1.0840559E-4 | 1.2261440E+4 | 1.4042381E-3 | 1.2261440E+4 | 1.8792836E-3 |
| 1.2261630E+4 | 1.4135220E-4 | 1.2261630E+4 | 1.1529419E-3 | 1.2261630E+4 | 2.8459113E-3 |
| 1.2261830E+4 | 3.6705337E-4 | 1.2261830E+4 | 1.7243508E-3 | 1.2261830E+4 | 1.8850000E-3 |
| 1.2262010E+4 | 3.0660441E-4 | 1.2262010E+4 | 1.3617432E-3 | 1.2262010E+4 | 2.9058000E-3 |
| 1.2262190E+4 | 1.8654197E-4 | 1.2262190E+4 | 1.0170524E-3 | 1.2262190E+4 | 2.6259090E-3 |
| 1.2262390E+4 | 3.9235229E-4 | 1.2262390E+4 | 1.2283104E-3 | 1.2262390E+4 | 2.1360701E-3 |
| 1.2262600E+4 | 1.4877210E-4 | 1.2262600E+4 | 1.8635973E-3 | 1.2262600E+4 | 2.9850000E-3 |
| 1.2262800E+4 | 2.8664541E-4 | 1.2262800E+4 | 1.9897571E-3 | 1.2262800E+4 | 2.8267415E-3 |
| 1.2263000E+4 | 1.7777159E-4 | 1.2263000E+4 | 2.0806461E-3 | 1.2263000E+4 | 2.4215131E-3 |
| 1.2263190E+4 | 4.9879103E-4 | 1.2263190E+4 | 1.8615567E-3 | 1.2263190E+4 | 2.1208458E-3 |
| 1.2263370E+4 | 5.0500295E-4 | 1.2263370E+4 | 1.6264101E-3 | 1.2263370E+4 | 2.5331365E-3 |
| 1.2263540E+4 | 3.8587011E-4 | 1.2263540E+4 | 1.8941674E-3 | 1.2263540E+4 | 3.2003001E-3 |
| 1.2263710E+4 | 5.6627598E-4 | 1.2263710E+4 | 1.9634409E-3 | 1.2263710E+4 | 2.6329947E-3 |
| 1.2263890E+4 | 5.8006639E-4 | 1.2263890E+4 | 1.8580563E-3 | 1.2263890E+4 | 2.6666334E-3 |
| 1.2264080E+4 | 3.8308808E-4 | 1.2264080E+4 | 1.8694992E-3 | 1.2264080E+4 | 2.7828830E-3 |
| 1.2264270E+4 | 4.1860969E-4 | 1.2264270E+4 | 7.2147440E-4 | 1.2264270E+4 | 2.8237719E-3 |
| 1.2264460E+4 | 4.7993268E-4 | 1.2264460E+4 | 2.0741522E-3 | 1.2264460E+4 | 2.4075970E-3 |
| 1.2264660E+4 | 4.9181844E-4 | 1.2264660E+4 | 1.7808624E-3 | 1.2264660E+4 | 2.3090434E-3 |
| 1.2264840E+4 | 4.7780188E-4 | 1.2264840E+4 | 2.1087284E-3 | 1.2264840E+4 | 2.4704374E-3 |
| 1.2265020E+4 | 5.9537774E-4 | 1.2265020E+4 | 2.1744903E-3 | 1.2265020E+4 | 3.0850997E-3 |
| 1.2265200E+4 | 5.8191326E-4 | 1.2265200E+4 | 2.0018826E-3 | 1.2265200E+4 | 3.7463502E-3 |
| 1.2265390E+4 | 1.8852709E-4 | 1.2265390E+4 | 1.3810956E-3 | 1.2265390E+4 | 3.0047366E-3 |
| 1.2265590E+4 | 3.3224945E-4 | 1.2265590E+4 | 1.6173571E-3 | 1.2265590E+4 | 2.7780708E-3 |
| 1.2265790E+4 | 3.9535181E-4 | 1.2265790E+4 | 1.6323552E-3 | 1.2265790E+4 | 2.4407131E-3 |
| 1.2265990E+4 | 4.2675930E-4 | 1.2265990E+4 | 2.0548243E-3 | 1.2265990E+4 | 2.2955672E-3 |
| 1.2266190E+4 | 5.8530001E-4 | 1.2266190E+4 | 2.1031420E-3 | 1.2266190E+4 | 3.1970054E-3 |
| 1.2266380E+4 | 8.0116414E-4 | 1.2266380E+4 | 2.0195610E-3 | 1.2266380E+4 | 2.9953120E-3 |
| 1.2266560E+4 | 7.5553683E-4 | 1.2266560E+4 | 1.8629950E-3 | 1.2266560E+4 | 2.4011450E-3 |
| 1.2266740E+4 | 8.6869404E-4 | 1.2266740E+4 | 1.1199453E-3 | 1.2266740E+4 | 2.2454555E-3 |
| 1.2266920E+4 | 8.7162578E-4 | 1.2266920E+4 | 1.7443707E-3 | 1.2266920E+4 | 2.7022522E-3 |
| 1.2267110E+4 | 1.0764250E-3 | 1.2267110E+4 | 2.6046088E-3 | 1.2267110E+4 | 3.0134958E-3 |
| 1.2267310E+4 | 7.7488147E-4 | 1.2267310E+4 | 2.6537737E-3 | 1.2267310E+4 | 3.5385972E-3 |
| 1.2267500E+4 | 8.2549930E-4 | 1.2267500E+4 | 2.3937965E-3 | 1.2267500E+4 | 3.4918563E-3 |
| 1.2267700E+4 | 1.2216445E-3 | 1.2267700E+4 | 1.6595609E-3 | 1.2267700E+4 | 2.2554567E-3 |
| 1.2267880E+4 | 1.0522527E-3 | 1.2267880E+4 | 1.8352068E-3 | 1.2267880E+4 | 2.9069318E-3 |
| 1.2268060E+4 | 1.2015254E-3 | 1.2268060E+4 | 1.6565366E-3 | 1.2268060E+4 | 4.1722000E-3 |
| 1.2268230E+4 | 9.8594448E-4 | 1.2268230E+4 | 1.9811271E-3 | 1.2268230E+4 | 3.5485918E-3 |
| 1.2268410E+4 | 1.2043601E-3 | 1.2268410E+4 | 2.1524073E-3 | 1.2268410E+4 | 4.0615616E-3 |
| 1.2268590E+4 | 1.2191272E-3 | 1.2268590E+4 | 2.6552772E-3 | 1.2268590E+4 | 3.5864402E-3 |
| 1.2268790E+4 | 1.4179481E-3 | 1.2268790E+4 | 2.6244996E-3 | 1.2268790E+4 | 2.6523219E-3 |

|                           |                           |                           |
|---------------------------|---------------------------|---------------------------|
| 1.2268990E+4 1.5647530E-3 | 1.2268990E+4 2.8994277E-3 | 1.2268990E+4 2.6803078E-3 |
| 1.2269200E+4 1.5550250E-3 | 1.2269200E+4 2.8162839E-3 | 1.2269200E+4 3.5601026E-3 |
| 1.2269400E+4 1.7411672E-3 | 1.2269400E+4 2.7850467E-3 | 1.2269400E+4 4.2349942E-3 |
| 1.2269590E+4 1.5409211E-3 | 1.2269590E+4 3.3794550E-3 | 1.2269590E+4 4.4171417E-3 |
| 1.2269770E+4 2.0811428E-3 | 1.2269770E+4 3.2096346E-3 | 1.2269770E+4 4.2010452E-3 |
| 1.2269960E+4 2.0346328E-3 | 1.2269960E+4 2.7174193E-3 | 1.2269960E+4 3.9262600E-3 |
| 1.2270150E+4 2.4201128E-3 | 1.2270150E+4 3.5626069E-3 | 1.2270150E+4 3.9579004E-3 |
| 1.2270370E+4 2.4654142E-3 | 1.2270370E+4 3.8844522E-3 | 1.2270370E+4 4.4874730E-3 |
| 1.2270580E+4 2.7871393E-3 | 1.2270580E+4 3.2458989E-3 | 1.2270580E+4 4.4603791E-3 |
| 1.2270800E+4 3.2204072E-3 | 1.2270800E+4 2.8046743E-3 | 1.2270800E+4 4.4575480E-3 |
| 1.2271010E+4 3.1464176E-3 | 1.2271010E+4 4.1686584E-3 | 1.2271010E+4 5.9267675E-3 |
| 1.2271220E+4 3.8044152E-3 | 1.2271220E+4 4.7560834E-3 | 1.2271220E+4 5.5468327E-3 |
| 1.2271410E+4 3.8860101E-3 | 1.2271410E+4 4.0090004E-3 | 1.2271410E+4 5.8433726E-3 |
| 1.2271590E+4 3.9319047E-3 | 1.2271590E+4 4.7723777E-3 | 1.2271590E+4 6.5874167E-3 |
| 1.2271780E+4 4.3888829E-3 | 1.2271780E+4 5.4881153E-3 | 1.2271780E+4 5.7391687E-3 |
| 1.2272000E+4 4.8179796E-3 | 1.2272000E+4 5.4229118E-3 | 1.2272000E+4 6.8676014E-3 |
| 1.2272210E+4 5.3927123E-3 | 1.2272210E+4 5.7151029E-3 | 1.2272210E+4 7.3121009E-3 |
| 1.2272430E+4 6.0756460E-3 | 1.2272430E+4 6.6785053E-3 | 1.2272430E+4 7.9042147E-3 |
| 1.2272640E+4 7.3400332E-3 | 1.2272640E+4 7.8106495E-3 | 1.2272640E+4 8.2718694E-3 |
| 1.2272830E+4 7.6876916E-3 | 1.2272830E+4 8.6352934E-3 | 1.2272830E+4 8.9805873E-3 |
| 1.2273020E+4 8.6684349E-3 | 1.2273020E+4 9.9807192E-3 | 1.2273020E+4 1.0228000E-2 |
| 1.2273210E+4 9.6826168E-3 | 1.2273210E+4 1.0584161E-2 | 1.2273210E+4 1.1547695E-2 |
| 1.2273410E+4 1.0588875E-2 | 1.2273410E+4 1.1894164E-2 | 1.2273410E+4 1.3115796E-2 |
| 1.2273600E+4 1.2606903E-2 | 1.2273600E+4 1.4391728E-2 | 1.2273600E+4 1.3064331E-2 |
| 1.2273820E+4 1.3773017E-2 | 1.2273820E+4 1.5791074E-2 | 1.2273820E+4 1.6680779E-2 |
| 1.2274020E+4 1.6298537E-2 | 1.2274020E+4 1.8951584E-2 | 1.2274020E+4 1.8700786E-2 |
| 1.2274230E+4 1.8992527E-2 | 1.2274230E+4 2.3041736E-2 | 1.2274230E+4 2.1737586E-2 |
| 1.2274440E+4 2.2089478E-2 | 1.2274440E+4 2.5879706E-2 | 1.2274440E+4 2.5036839E-2 |
| 1.2274630E+4 2.5384355E-2 | 1.2274630E+4 3.0373425E-2 | 1.2274630E+4 2.7988287E-2 |
| 1.2274820E+4 2.9741157E-2 | 1.2274820E+4 3.7277843E-2 | 1.2274820E+4 3.2424540E-2 |
| 1.2275010E+4 3.4313578E-2 | 1.2275010E+4 4.4170300E-2 | 1.2275010E+4 3.9510188E-2 |
| 1.2275210E+4 4.2045275E-2 | 1.2275210E+4 5.1657375E-2 | 1.2275210E+4 4.5106408E-2 |
| 1.2275410E+4 5.0501201E-2 | 1.2275410E+4 6.3100709E-2 | 1.2275410E+4 5.3456412E-2 |
| 1.2275620E+4 6.1148615E-2 | 1.2275620E+4 7.5752088E-2 | 1.2275620E+4 6.5914641E-2 |
| 1.2275820E+4 7.4624021E-2 | 1.2275820E+4 8.8146835E-2 | 1.2275820E+4 7.8485911E-2 |
| 1.2276010E+4 8.8883146E-2 | 1.2276010E+4 1.0696579E-1 | 1.2276010E+4 9.1759589E-2 |
| 1.2276200E+4 1.0901547E-1 | 1.2276200E+4 1.2897663E-1 | 1.2276200E+4 1.0893275E-1 |
| 1.2276380E+4 1.3270679E-1 | 1.2276380E+4 1.4872437E-1 | 1.2276380E+4 1.2778217E-1 |
| 1.2276560E+4 1.5752738E-1 | 1.2276560E+4 1.7038356E-1 | 1.2276560E+4 1.4696108E-1 |
| 1.2276740E+4 1.8947836E-1 | 1.2276740E+4 1.9954569E-1 | 1.2276740E+4 1.7165462E-1 |
| 1.2276930E+4 2.2579139E-1 | 1.2276930E+4 2.2939114E-1 | 1.2276930E+4 1.9983839E-1 |
| 1.2277120E+4 2.6733156E-1 | 1.2277120E+4 2.5893654E-1 | 1.2277120E+4 2.2940620E-1 |
| 1.2277310E+4 3.1607648E-1 | 1.2277310E+4 2.8948654E-1 | 1.2277310E+4 2.6472421E-1 |
| 1.2277510E+4 3.6398537E-1 | 1.2277510E+4 3.2390405E-1 | 1.2277510E+4 2.9565770E-1 |
| 1.2277700E+4 4.1691336E-1 | 1.2277700E+4 3.5761926E-1 | 1.2277700E+4 3.3130964E-1 |
| 1.2277880E+4 4.6241615E-1 | 1.2277880E+4 3.8729201E-1 | 1.2277880E+4 3.6738858E-1 |
| 1.2278060E+4 5.0698526E-1 | 1.2278060E+4 4.1574711E-1 | 1.2278060E+4 3.9851064E-1 |
| 1.2278240E+4 5.4750334E-1 | 1.2278240E+4 4.4029697E-1 | 1.2278240E+4 4.3165241E-1 |
| 1.2278450E+4 5.8369771E-1 | 1.2278450E+4 4.6758653E-1 | 1.2278450E+4 4.6864159E-1 |
| 1.2278660E+4 6.1686880E-1 | 1.2278660E+4 4.9538216E-1 | 1.2278660E+4 4.9958665E-1 |
| 1.2278860E+4 6.3453121E-1 | 1.2278860E+4 5.1084939E-1 | 1.2278860E+4 5.2556622E-1 |
| 1.2279060E+4 6.4611199E-1 | 1.2279060E+4 5.2473216E-1 | 1.2279060E+4 5.4879103E-1 |

1.2279260E+4 6.4842903E-1 1.2279260E+4 5.3749306E-1 1.2279260E+4 5.7159741E-1  
1.2279450E+4 6.4314977E-1 1.2279450E+4 5.4222281E-1 1.2279450E+4 5.8679515E-1  
1.2279640E+4 6.3001847E-1 1.2279640E+4 5.4614104E-1 1.2279640E+4 5.9901727E-1  
1.2279830E+4 6.1553565E-1 1.2279830E+4 5.5232714E-1 1.2279830E+4 6.1474866E-1  
1.2280020E+4 5.9877759E-1 1.2280020E+4 5.5642597E-1 1.2280020E+4 6.2468621E-1  
1.2280210E+4 5.7564330E-1 1.2280210E+4 5.5942320E-1 1.2280210E+4 6.2950381E-1  
1.2280420E+4 5.5500783E-1 1.2280420E+4 5.5630749E-1 1.2280420E+4 6.3756000E-1  
1.2280630E+4 5.3022606E-1 1.2280630E+4 5.6004022E-1 1.2280630E+4 6.4442000E-1  
1.2280830E+4 5.1415653E-1 1.2280830E+4 5.6117517E-1 1.2280830E+4 6.4758129E-1  
1.2281010E+4 5.0326520E-1 1.2281010E+4 5.6259870E-1 1.2281010E+4 6.5147936E-1  
1.2281190E+4 4.9580572E-1 1.2281190E+4 5.5835820E-1 1.2281190E+4 6.5354070E-1  
1.2281370E+4 4.9086949E-1 1.2281370E+4 5.5676964E-1 1.2281370E+4 6.5431854E-1  
1.2281560E+4 4.9012841E-1 1.2281560E+4 5.6132899E-1 1.2281560E+4 6.5487885E-1  
1.2281760E+4 4.9115882E-1 1.2281760E+4 5.6419283E-1 1.2281760E+4 6.5540366E-1  
1.2281970E+4 4.9329624E-1 1.2281970E+4 5.6344293E-1 1.2281970E+4 6.5626960E-1  
1.2282180E+4 5.0537885E-1 1.2282180E+4 5.7254268E-1 1.2282180E+4 6.6020137E-1  
1.2282380E+4 5.1596569E-1 1.2282380E+4 5.7872119E-1 1.2282380E+4 6.6308322E-1  
1.2282580E+4 5.2722860E-1 1.2282580E+4 5.8187809E-1 1.2282580E+4 6.6568603E-1  
1.2282790E+4 5.4005679E-1 1.2282790E+4 5.9335444E-1 1.2282790E+4 6.7478627E-1  
1.2282990E+4 5.5715057E-1 1.2282990E+4 5.9725373E-1 1.2282990E+4 6.7843007E-1  
1.2283180E+4 5.7301227E-1 1.2283180E+4 6.0182729E-1 1.2283180E+4 6.8327263E-1  
1.2283400E+4 5.9025461E-1 1.2283400E+4 6.1163229E-1 1.2283400E+4 6.9547933E-1  
1.2283620E+4 6.1224946E-1 1.2283620E+4 6.2381648E-1 1.2283620E+4 7.0290860E-1  
1.2283840E+4 6.3175497E-1 1.2283840E+4 6.3628659E-1 1.2283840E+4 7.0952643E-1  
1.2284070E+4 6.5451040E-1 1.2284070E+4 6.4233526E-1 1.2284070E+4 7.1408276E-1  
1.2284290E+4 6.8171486E-1 1.2284290E+4 6.5223822E-1 1.2284290E+4 7.2157446E-1  
1.2284490E+4 6.9888423E-1 1.2284490E+4 6.6542365E-1 1.2284490E+4 7.3238181E-1  
1.2284680E+4 7.1997051E-1 1.2284680E+4 6.7951226E-1 1.2284680E+4 7.3739610E-1  
1.2284870E+4 7.4221784E-1 1.2284870E+4 6.8766080E-1 1.2284870E+4 7.3688118E-1  
1.2285090E+4 7.6292168E-1 1.2285090E+4 6.9630516E-1 1.2285090E+4 7.3708487E-1  
1.2285300E+4 7.7824076E-1 1.2285300E+4 7.1186968E-1 1.2285300E+4 7.3977648E-1  
1.2285520E+4 7.9823778E-1 1.2285520E+4 7.2852046E-1 1.2285520E+4 7.4662751E-1  
1.2285730E+4 8.1444956E-1 1.2285730E+4 7.4008849E-1 1.2285730E+4 7.4427695E-1  
1.2285940E+4 8.2959848E-1 1.2285940E+4 7.5409649E-1 1.2285940E+4 7.3993203E-1  
1.2286150E+4 8.4314643E-1 1.2286150E+4 7.6778366E-1 1.2286150E+4 7.4378000E-1  
1.2286350E+4 8.5591760E-1 1.2286350E+4 7.7798076E-1 1.2286350E+4 7.4496811E-1  
1.2286540E+4 8.6001085E-1 1.2286540E+4 7.8934846E-1 1.2286540E+4 7.4760707E-1  
1.2286750E+4 8.7235890E-1 1.2286750E+4 8.0253839E-1 1.2286750E+4 7.5075253E-1  
1.2286970E+4 8.8001948E-1 1.2286970E+4 8.1492832E-1 1.2286970E+4 7.4891919E-1  
1.2287190E+4 8.8301827E-1 1.2287190E+4 8.2615917E-1 1.2287190E+4 7.4298010E-1  
1.2287410E+4 8.8793725E-1 1.2287410E+4 8.3692452E-1 1.2287410E+4 7.5210273E-1  
1.2287620E+4 8.9162493E-1 1.2287620E+4 8.4217798E-1 1.2287620E+4 7.5347075E-1  
1.2287830E+4 8.9485631E-1 1.2287830E+4 8.5168363E-1 1.2287830E+4 7.5317289E-1  
1.2288030E+4 8.9746589E-1 1.2288030E+4 8.5870033E-1 1.2288030E+4 7.5838339E-1  
1.2288220E+4 8.9527923E-1 1.2288220E+4 8.6119988E-1 1.2288220E+4 7.6705521E-1  
1.2288410E+4 8.9747991E-1 1.2288410E+4 8.6422567E-1 1.2288410E+4 7.6330561E-1  
1.2288620E+4 8.9866988E-1 1.2288620E+4 8.6270611E-1 1.2288620E+4 7.7146268E-1  
1.2288840E+4 8.9709970E-1 1.2288840E+4 8.5855315E-1 1.2288840E+4 7.7372688E-1  
1.2289040E+4 8.9935068E-1 1.2289040E+4 8.6091363E-1 1.2289040E+4 7.8019097E-1  
1.2289240E+4 8.9544413E-1 1.2289240E+4 8.6131546E-1 1.2289240E+4 7.8449826E-1  
1.2289430E+4 9.0054145E-1 1.2289430E+4 8.5674881E-1 1.2289430E+4 7.9732268E-1  
1.2289620E+4 8.9964741E-1 1.2289620E+4 8.5584615E-1 1.2289620E+4 8.0546542E-1



1.2289800E+4 8.9814211E-1 1.2289800E+4 8.5387188E-1 1.2289800E+4 8.0810298E-1  
1.2289990E+4 8.9916825E-1 1.2289990E+4 8.4765281E-1 1.2289990E+4 8.1119262E-1  
1.2290170E+4 8.9972717E-1 1.2290170E+4 8.4737876E-1 1.2290170E+4 8.1953081E-1  
1.2290370E+4 8.9988099E-1 1.2290370E+4 8.4362947E-1 1.2290370E+4 8.2917216E-1  
1.2290580E+4 9.0122475E-1 1.2290580E+4 8.3608765E-1 1.2290580E+4 8.3344441E-1  
1.2290780E+4 8.9524163E-1 1.2290780E+4 8.3676153E-1 1.2290780E+4 8.4003857E-1  
1.2290970E+4 8.9716087E-1 1.2290970E+4 8.3504594E-1 1.2290970E+4 8.4561264E-1  
1.2291150E+4 9.0001430E-1 1.2291150E+4 8.3346832E-1 1.2291150E+4 8.5494575E-1  
1.2291340E+4 9.0114468E-1 1.2291340E+4 8.3149724E-1 1.2291340E+4 8.5817171E-1  
1.2291520E+4 9.0114219E-1 1.2291520E+4 8.3222822E-1 1.2291520E+4 8.5822712E-1  
1.2291720E+4 9.0668625E-1 1.2291720E+4 8.2696188E-1 1.2291720E+4 8.6817481E-1  
1.2291930E+4 9.0820100E-1 1.2291930E+4 8.2280855E-1 1.2291930E+4 8.6776113E-1  
1.2292140E+4 9.0371682E-1 1.2292140E+4 8.2364386E-1 1.2292140E+4 8.7067302E-1  
1.2292350E+4 9.0931884E-1 1.2292350E+4 8.2228785E-1 1.2292350E+4 8.7359180E-1  
1.2292550E+4 9.1046665E-1 1.2292550E+4 8.2185086E-1 1.2292550E+4 8.7651001E-1  
1.2292750E+4 9.0770130E-1 1.2292750E+4 8.1755126E-1 1.2292750E+4 8.7833890E-1  
1.2292940E+4 9.0672030E-1 1.2292940E+4 8.1996294E-1 1.2292940E+4 8.7882933E-1  
1.2293130E+4 9.1321178E-1 1.2293130E+4 8.2195384E-1 1.2293130E+4 8.8302283E-1  
1.2293320E+4 9.1159926E-1 1.2293320E+4 8.2148763E-1 1.2293320E+4 8.8007883E-1  
1.2293510E+4 9.1338137E-1 1.2293510E+4 8.2435825E-1 1.2293510E+4 8.7359813E-1  
1.2293720E+4 9.1570928E-1 1.2293720E+4 8.2580076E-1 1.2293720E+4 8.7650979E-1  
1.2293930E+4 9.1535576E-1 1.2293930E+4 8.2961926E-1 1.2293930E+4 8.7952586E-1  
1.2294120E+4 9.1966883E-1 1.2294120E+4 8.2411842E-1 1.2294120E+4 8.7666185E-1  
1.2294310E+4 9.2034914E-1 1.2294310E+4 8.3150196E-1 1.2294310E+4 8.7801000E-1  
1.2294490E+4 9.2295325E-1 1.2294490E+4 8.3499810E-1 1.2294490E+4 8.7862890E-1  
1.2294670E+4 9.2208579E-1 1.2294670E+4 8.3705687E-1 1.2294670E+4 8.7984420E-1  
1.2294860E+4 9.2542192E-1 1.2294860E+4 8.4765672E-1 1.2294860E+4 8.8186493E-1  
1.2295060E+4 9.2955174E-1 1.2295060E+4 8.4752752E-1 1.2295060E+4 8.8284164E-1  
1.2295270E+4 9.2818598E-1 1.2295270E+4 8.5327165E-1 1.2295270E+4 8.8825570E-1  
1.2295480E+4 9.3236691E-1 1.2295480E+4 8.6254195E-1 1.2295480E+4 8.8745150E-1  
1.2295690E+4 9.3517248E-1 1.2295690E+4 8.6752645E-1 1.2295690E+4 8.8942129E-1  
1.2295900E+4 9.3702244E-1 1.2295900E+4 8.6972057E-1 1.2295900E+4 8.8647710E-1  
1.2296100E+4 9.3329183E-1 1.2296100E+4 8.8208039E-1 1.2296100E+4 8.9108528E-1  
1.2296300E+4 9.3495226E-1 1.2296300E+4 8.8986418E-1 1.2296300E+4 8.9562166E-1  
1.2296490E+4 9.3616373E-1 1.2296490E+4 8.9820201E-1 1.2296490E+4 9.0020078E-1  
1.2296690E+4 9.4097779E-1 1.2296690E+4 9.0531005E-1 1.2296690E+4 9.0015833E-1  
1.2296900E+4 9.3949078E-1 1.2296900E+4 9.1289328E-1 1.2296900E+4 9.0528493E-1  
1.2297130E+4 9.4078577E-1 1.2297130E+4 9.2007316E-1 1.2297130E+4 9.0736761E-1  
1.2297350E+4 9.4811062E-1 1.2297350E+4 9.2478358E-1 1.2297350E+4 9.1126649E-1  
1.2297550E+4 9.4749798E-1 1.2297550E+4 9.3218620E-1 1.2297550E+4 9.1190677E-1  
1.2297750E+4 9.4573280E-1 1.2297750E+4 9.3787501E-1 1.2297750E+4 9.2468225E-1  
1.2297950E+4 9.4760802E-1 1.2297950E+4 9.4505675E-1 1.2297950E+4 9.2179000E-1  
1.2298140E+4 9.5072760E-1 1.2298140E+4 9.5406575E-1 1.2298140E+4 9.2489000E-1  
1.2298320E+4 9.5485263E-1 1.2298320E+4 9.5886567E-1 1.2298320E+4 9.3513997E-1  
1.2298530E+4 9.5762352E-1 1.2298530E+4 9.6046663E-1 1.2298530E+4 9.4145000E-1  
1.2298740E+4 9.5973769E-1 1.2298740E+4 9.6528541E-1 1.2298740E+4 9.4070000E-1  
1.2298950E+4 9.5711255E-1 1.2298950E+4 9.7211804E-1 1.2298950E+4 9.4361512E-1  
1.2299160E+4 9.6155826E-1 1.2299160E+4 9.6916822E-1 1.2299160E+4 9.5206399E-1  
1.2299370E+4 9.6423387E-1 1.2299370E+4 9.7559001E-1 1.2299370E+4 9.5581218E-1  
1.2299560E+4 9.6866143E-1 1.2299560E+4 9.7638856E-1 1.2299560E+4 9.6111451E-1  
1.2299760E+4 9.7221086E-1 1.2299760E+4 9.7455452E-1 1.2299760E+4 9.6215398E-1  
1.2299950E+4 9.7159546E-1 1.2299950E+4 9.8343180E-1 1.2299950E+4 9.6823286E-1

|                           |                           |                           |
|---------------------------|---------------------------|---------------------------|
| 1.2300140E+4 9.7465995E-1 | 1.2300140E+4 9.8334425E-1 | 1.2300140E+4 9.7223311E-1 |
| 1.2300350E+4 9.8117599E-1 | 1.2300350E+4 9.8405122E-1 | 1.2300350E+4 9.7094315E-1 |
| 1.2300570E+4 9.8283152E-1 | 1.2300570E+4 9.8405405E-1 | 1.2300570E+4 9.7857028E-1 |
| 1.2300780E+4 9.8399209E-1 | 1.2300780E+4 9.8938571E-1 | 1.2300780E+4 9.8409860E-1 |
| 1.2300990E+4 9.8603614E-1 | 1.2300990E+4 9.8835622E-1 | 1.2300990E+4 9.8897000E-1 |
| 1.2301180E+4 9.8771672E-1 | 1.2301180E+4 9.8742337E-1 | 1.2301180E+4 9.9008566E-1 |
| 1.2301370E+4 9.8981399E-1 | 1.2301370E+4 9.8585799E-1 | 1.2301370E+4 9.9304574E-1 |
| 1.2301550E+4 9.9333971E-1 | 1.2301550E+4 9.8902900E-1 | 1.2301550E+4 9.9789077E-1 |
| 1.2301750E+4 9.9549336E-1 | 1.2301750E+4 9.8812145E-1 | 1.2301750E+4 9.9760652E-1 |
| 1.2301950E+4 9.9523734E-1 | 1.2301950E+4 9.8990375E-1 | 1.2301950E+4 1.0010000E+0 |
| 1.2302150E+4 9.9971851E-1 | 1.2302150E+4 9.9468761E-1 | 1.2302150E+4 1.0073000E+0 |
| 1.2302350E+4 1.0026209E+0 | 1.2302350E+4 9.9708883E-1 | 1.2302350E+4 1.0103856E+0 |
| 1.2302540E+4 1.0035283E+0 | 1.2302540E+4 1.0008842E+0 | 1.2302540E+4 1.0120215E+0 |
| 1.2302730E+4 1.0059901E+0 | 1.2302730E+4 9.9670305E-1 | 1.2302730E+4 1.0142495E+0 |
| 1.2302910E+4 1.0039774E+0 | 1.2302910E+4 9.9972035E-1 | 1.2302910E+4 1.0136000E+0 |
| 1.2303080E+4 1.0088745E+0 | 1.2303080E+4 1.0022264E+0 | 1.2303080E+4 1.0125128E+0 |
| 1.2303250E+4 1.0115068E+0 | 1.2303250E+4 1.0022797E+0 | 1.2303250E+4 1.0126746E+0 |
| 1.2303430E+4 1.0121992E+0 | 1.2303430E+4 1.0073886E+0 | 1.2303430E+4 1.0164916E+0 |
| 1.2303630E+4 1.0151507E+0 | 1.2303630E+4 1.0071802E+0 | 1.2303630E+4 1.0191752E+0 |
| 1.2303820E+4 1.0177133E+0 | 1.2303820E+4 1.0080335E+0 | 1.2303820E+4 1.0171295E+0 |
| 1.2304020E+4 1.0185826E+0 | 1.2304020E+4 1.0093944E+0 | 1.2304020E+4 1.0197824E+0 |
| 1.2304200E+4 1.0173890E+0 | 1.2304200E+4 1.0072414E+0 | 1.2304200E+4 1.0249642E+0 |
| 1.2304390E+4 1.0222801E+0 | 1.2304390E+4 1.0098787E+0 | 1.2304390E+4 1.0268896E+0 |
| 1.2304570E+4 1.0220240E+0 | 1.2304570E+4 1.0139279E+0 | 1.2304570E+4 1.0270070E+0 |
| 1.2304750E+4 1.0252158E+0 | 1.2304750E+4 1.0143620E+0 | 1.2304750E+4 1.0253572E+0 |
| 1.2304940E+4 1.0261492E+0 | 1.2304940E+4 1.0110019E+0 | 1.2304940E+4 1.0273391E+0 |
| 1.2305140E+4 1.0251434E+0 | 1.2305140E+4 1.0150056E+0 | 1.2305140E+4 1.0278147E+0 |
| 1.2305350E+4 1.0248659E+0 | 1.2305350E+4 1.0144572E+0 | 1.2305350E+4 1.0244713E+0 |
| 1.2305550E+4 1.0300195E+0 | 1.2305550E+4 1.0130839E+0 | 1.2305550E+4 1.0286334E+0 |
| 1.2305750E+4 1.0298989E+0 | 1.2305750E+4 1.0142141E+0 | 1.2305750E+4 1.0311018E+0 |
| 1.2305950E+4 1.0304271E+0 | 1.2305950E+4 1.0239758E+0 | 1.2305950E+4 1.0317987E+0 |
| 1.2306130E+4 1.0318510E+0 | 1.2306130E+4 1.0147197E+0 | 1.2306130E+4 1.0310828E+0 |
| 1.2306320E+4 1.0343843E+0 | 1.2306320E+4 1.0164740E+0 | 1.2306320E+4 1.0352533E+0 |
| 1.2306500E+4 1.0342949E+0 | 1.2306500E+4 1.0162838E+0 | 1.2306500E+4 1.0395143E+0 |
| 1.2306700E+4 1.0360597E+0 | 1.2306700E+4 1.0171727E+0 | 1.2306700E+4 1.0334201E+0 |
| 1.2306900E+4 1.0360930E+0 | 1.2306900E+4 1.0218701E+0 | 1.2306900E+4 1.0369646E+0 |
| 1.2307100E+4 1.0358349E+0 | 1.2307100E+4 1.0149353E+0 | 1.2307100E+4 1.0347151E+0 |
| 1.2307290E+4 1.0380508E+0 | 1.2307290E+4 1.0139719E+0 | 1.2307290E+4 1.0362896E+0 |
| 1.2307490E+4 1.0396409E+0 | 1.2307490E+4 1.0217297E+0 | 1.2307490E+4 1.0398347E+0 |
| 1.2307660E+4 1.0371964E+0 | 1.2307660E+4 1.0161762E+0 | 1.2307660E+4 1.0371885E+0 |
| 1.2307840E+4 1.0358256E+0 | 1.2307840E+4 1.0169227E+0 | 1.2307840E+4 1.0376593E+0 |
| 1.2308020E+4 1.0371378E+0 | 1.2308020E+4 1.0186849E+0 | 1.2308020E+4 1.0380272E+0 |
| 1.2308230E+4 1.0423680E+0 | 1.2308230E+4 1.0216425E+0 | 1.2308230E+4 1.0428605E+0 |
| 1.2308440E+4 1.0433320E+0 | 1.2308440E+4 1.0230242E+0 | 1.2308440E+4 1.0455590E+0 |
| 1.2308650E+4 1.0426204E+0 | 1.2308650E+4 1.0225856E+0 | 1.2308650E+4 1.0411850E+0 |
| 1.2308860E+4 1.0448831E+0 | 1.2308860E+4 1.0173483E+0 | 1.2308860E+4 1.0393394E+0 |
| 1.2309060E+4 1.0465104E+0 | 1.2309060E+4 1.0244278E+0 | 1.2309060E+4 1.0412525E+0 |
| 1.2309260E+4 1.0446422E+0 | 1.2309260E+4 1.0236631E+0 | 1.2309260E+4 1.0462416E+0 |
| 1.2309450E+4 1.0448996E+0 | 1.2309450E+4 1.0248184E+0 | 1.2309450E+4 1.0439378E+0 |
| 1.2309650E+4 1.0420314E+0 | 1.2309650E+4 1.0271124E+0 | 1.2309650E+4 1.0447127E+0 |
| 1.2309860E+4 1.0436862E+0 | 1.2309860E+4 1.0305543E+0 | 1.2309860E+4 1.0461940E+0 |
| 1.2310070E+4 1.0445103E+0 | 1.2310070E+4 1.0314890E+0 | 1.2310070E+4 1.0433911E+0 |

|              |              |              |              |              |              |
|--------------|--------------|--------------|--------------|--------------|--------------|
| 1.2310280E+4 | 1.0474578E+0 | 1.2310280E+4 | 1.0305784E+0 | 1.2310280E+4 | 1.0449863E+0 |
| 1.2310490E+4 | 1.0508704E+0 | 1.2310490E+4 | 1.0348108E+0 | 1.2310490E+4 | 1.0489718E+0 |
| 1.2310700E+4 | 1.0497862E+0 | 1.2310700E+4 | 1.0371407E+0 | 1.2310700E+4 | 1.0430435E+0 |
| 1.2310900E+4 | 1.0494021E+0 | 1.2310900E+4 | 1.0381253E+0 | 1.2310900E+4 | 1.0511055E+0 |
| 1.2311090E+4 | 1.0498739E+0 | 1.2311090E+4 | 1.0392181E+0 | 1.2311090E+4 | 1.0463433E+0 |
| 1.2311280E+4 | 1.0494237E+0 | 1.2311280E+4 | 1.0376144E+0 | 1.2311280E+4 | 1.0446051E+0 |
| 1.2311470E+4 | 1.0503517E+0 | 1.2311470E+4 | 1.0460444E+0 | 1.2311470E+4 | 1.0414021E+0 |
| 1.2311680E+4 | 1.0530550E+0 | 1.2311680E+4 | 1.0426383E+0 | 1.2311680E+4 | 1.0349695E+0 |
| 1.2311890E+4 | 1.0467328E+0 | 1.2311890E+4 | 1.0435935E+0 | 1.2311890E+4 | 1.0415138E+0 |
| 1.2312100E+4 | 1.0460441E+0 | 1.2312100E+4 | 1.0430531E+0 | 1.2312100E+4 | 1.0468523E+0 |
| 1.2312310E+4 | 1.0506282E+0 | 1.2312310E+4 | 1.0442213E+0 | 1.2312310E+4 | 1.0423500E+0 |
| 1.2312500E+4 | 1.0512844E+0 | 1.2312500E+4 | 1.0478462E+0 | 1.2312500E+4 | 1.0378278E+0 |
| 1.2312700E+4 | 1.0513789E+0 | 1.2312700E+4 | 1.0561148E+0 | 1.2312700E+4 | 1.0413643E+0 |
| 1.2312890E+4 | 1.0536849E+0 | 1.2312890E+4 | 1.0540197E+0 | 1.2312890E+4 | 1.0446000E+0 |
| 1.2313080E+4 | 1.0558731E+0 | 1.2313080E+4 | 1.0490804E+0 | 1.2313080E+4 | 1.0464698E+0 |
| 1.2313290E+4 | 1.0515466E+0 | 1.2313290E+4 | 1.0506445E+0 | 1.2313290E+4 | 1.0434947E+0 |
| 1.2313510E+4 | 1.0528160E+0 | 1.2313510E+4 | 1.0530550E+0 | 1.2313510E+4 | 1.0457626E+0 |
| 1.2313720E+4 | 1.0546896E+0 | 1.2313720E+4 | 1.0574804E+0 | 1.2313720E+4 | 1.0447988E+0 |
| 1.2313930E+4 | 1.0563143E+0 | 1.2313930E+4 | 1.0566201E+0 | 1.2313930E+4 | 1.0423687E+0 |
| 1.2314140E+4 | 1.0579040E+0 | 1.2314140E+4 | 1.0518579E+0 | 1.2314140E+4 | 1.0391071E+0 |
| 1.2314340E+4 | 1.0607170E+0 | 1.2314340E+4 | 1.0519228E+0 | 1.2314340E+4 | 1.0467343E+0 |
| 1.2314530E+4 | 1.0615592E+0 | 1.2314530E+4 | 1.0560129E+0 | 1.2314530E+4 | 1.0411724E+0 |
| 1.2314720E+4 | 1.0585104E+0 | 1.2314720E+4 | 1.0572579E+0 | 1.2314720E+4 | 1.0387873E+0 |
| 1.2314910E+4 | 1.0600473E+0 | 1.2314910E+4 | 1.0495047E+0 | 1.2314910E+4 | 1.0390835E+0 |
| 1.2315120E+4 | 1.0618763E+0 | 1.2315120E+4 | 1.0479692E+0 | 1.2315120E+4 | 1.0377089E+0 |
| 1.2315330E+4 | 1.0607462E+0 | 1.2315330E+4 | 1.0543151E+0 | 1.2315330E+4 | 1.0415356E+0 |
| 1.2315530E+4 | 1.0615012E+0 | 1.2315530E+4 | 1.0616423E+0 | 1.2315530E+4 | 1.0375544E+0 |
| 1.2315720E+4 | 1.0616607E+0 | 1.2315720E+4 | 1.0577774E+0 | 1.2315720E+4 | 1.0344434E+0 |
| 1.2315910E+4 | 1.0642399E+0 | 1.2315910E+4 | 1.0544283E+0 | 1.2315910E+4 | 1.0411324E+0 |
| 1.2316100E+4 | 1.0641907E+0 | 1.2316100E+4 | 1.0570410E+0 | 1.2316100E+4 | 1.0403623E+0 |
| 1.2316270E+4 | 1.0623761E+0 | 1.2316270E+4 | 1.0539008E+0 | 1.2316270E+4 | 1.0362398E+0 |
| 1.2316450E+4 | 1.0618253E+0 | 1.2316450E+4 | 1.0532559E+0 | 1.2316450E+4 | 1.0415174E+0 |
| 1.2316640E+4 | 1.0622933E+0 | 1.2316640E+4 | 1.0555688E+0 | 1.2316640E+4 | 1.0407269E+0 |
| 1.2316840E+4 | 1.0610808E+0 | 1.2316840E+4 | 1.0555056E+0 | 1.2316840E+4 | 1.0453852E+0 |
| 1.2317040E+4 | 1.0617096E+0 | 1.2317040E+4 | 1.0506512E+0 | 1.2317040E+4 | 1.0431133E+0 |
| 1.2317240E+4 | 1.0667116E+0 | 1.2317240E+4 | 1.0494443E+0 | 1.2317240E+4 | 1.0410821E+0 |
| 1.2317430E+4 | 1.0695483E+0 | 1.2317430E+4 | 1.0529690E+0 | 1.2317430E+4 | 1.0383844E+0 |
| 1.2317620E+4 | 1.0679432E+0 | 1.2317620E+4 | 1.0566515E+0 | 1.2317620E+4 | 1.0371558E+0 |
| 1.2317800E+4 | 1.0669582E+0 | 1.2317800E+4 | 1.0456776E+0 | 1.2317800E+4 | 1.0392378E+0 |
| 1.2317990E+4 | 1.0674364E+0 | 1.2317990E+4 | 1.0456059E+0 | 1.2317990E+4 | 1.0371479E+0 |
| 1.2318180E+4 | 1.0637793E+0 | 1.2318180E+4 | 1.0418195E+0 | 1.2318180E+4 | 1.0357610E+0 |
| 1.2318400E+4 | 1.0664160E+0 | 1.2318400E+4 | 1.0475700E+0 | 1.2318400E+4 | 1.0364373E+0 |
| 1.2318620E+4 | 1.0695971E+0 | 1.2318620E+4 | 1.0492612E+0 | 1.2318620E+4 | 1.0356487E+0 |
| 1.2318820E+4 | 1.0679346E+0 | 1.2318820E+4 | 1.0451665E+0 | 1.2318820E+4 | 1.0302144E+0 |
| 1.2319030E+4 | 1.0675859E+0 | 1.2319030E+4 | 1.0453273E+0 | 1.2319030E+4 | 1.0372852E+0 |
| 1.2319220E+4 | 1.0691072E+0 | 1.2319220E+4 | 1.0397819E+0 | 1.2319220E+4 | 1.0408177E+0 |
| 1.2319420E+4 | 1.0692844E+0 | 1.2319420E+4 | 1.0380575E+0 | 1.2319420E+4 | 1.0381444E+0 |
| 1.2319600E+4 | 1.0691400E+0 | 1.2319600E+4 | 1.0404703E+0 | 1.2319600E+4 | 1.0392344E+0 |
| 1.2319780E+4 | 1.0691007E+0 | 1.2319780E+4 | 1.0369450E+0 | 1.2319780E+4 | 1.0362008E+0 |
| 1.2319990E+4 | 1.0690793E+0 | 1.2319990E+4 | 1.0339676E+0 | 1.2319990E+4 | 1.0356805E+0 |
| 1.2320210E+4 | 1.0678043E+0 | 1.2320210E+4 | 1.0331803E+0 | 1.2320210E+4 | 1.0377758E+0 |
| 1.2320420E+4 | 1.0639516E+0 | 1.2320420E+4 | 1.0369733E+0 | 1.2320420E+4 | 1.0351020E+0 |

|              |              |              |              |              |              |
|--------------|--------------|--------------|--------------|--------------|--------------|
| 1.2320620E+4 | 1.0666618E+0 | 1.2320620E+4 | 1.0335904E+0 | 1.2320620E+4 | 1.0380896E+0 |
| 1.2320810E+4 | 1.0687680E+0 | 1.2320810E+4 | 1.0338164E+0 | 1.2320810E+4 | 1.0418991E+0 |
| 1.2321000E+4 | 1.0648999E+0 | 1.2321000E+4 | 1.0356288E+0 | 1.2321000E+4 | 1.0395065E+0 |
| 1.2321180E+4 | 1.0668529E+0 | 1.2321180E+4 | 1.0293119E+0 | 1.2321180E+4 | 1.0392745E+0 |
| 1.2321370E+4 | 1.0710289E+0 | 1.2321370E+4 | 1.0267337E+0 | 1.2321370E+4 | 1.0387041E+0 |
| 1.2321580E+4 | 1.0681703E+0 | 1.2321580E+4 | 1.0283789E+0 | 1.2321580E+4 | 1.0342671E+0 |
| 1.2321800E+4 | 1.0663667E+0 | 1.2321800E+4 | 1.0275320E+0 | 1.2321800E+4 | 1.0362866E+0 |
| 1.2322010E+4 | 1.0658738E+0 | 1.2322010E+4 | 1.0287432E+0 | 1.2322010E+4 | 1.0326244E+0 |
| 1.2322220E+4 | 1.0662449E+0 | 1.2322220E+4 | 1.0311816E+0 | 1.2322220E+4 | 1.0365790E+0 |
| 1.2322430E+4 | 1.0638735E+0 | 1.2322430E+4 | 1.0277173E+0 | 1.2322430E+4 | 1.0354406E+0 |
| 1.2322640E+4 | 1.0655314E+0 | 1.2322640E+4 | 1.0219085E+0 | 1.2322640E+4 | 1.0374566E+0 |
| 1.2322850E+4 | 1.0698874E+0 | 1.2322850E+4 | 1.0231418E+0 | 1.2322850E+4 | 1.0373120E+0 |
| 1.2323050E+4 | 1.0678272E+0 | 1.2323050E+4 | 1.0200901E+0 | 1.2323050E+4 | 1.0370291E+0 |
| 1.2323260E+4 | 1.0662157E+0 | 1.2323260E+4 | 1.0191973E+0 | 1.2323260E+4 | 1.0359017E+0 |
| 1.2323490E+4 | 1.0596459E+0 | 1.2323490E+4 | 1.0245414E+0 | 1.2323490E+4 | 1.0344367E+0 |
| 1.2323720E+4 | 1.0616857E+0 | 1.2323720E+4 | 1.0185088E+0 | 1.2323720E+4 | 1.0367904E+0 |
| 1.2323930E+4 | 1.0710397E+0 | 1.2323930E+4 | 1.0181202E+0 | 1.2323930E+4 | 1.0365249E+0 |
| 1.2324150E+4 | 1.0673969E+0 | 1.2324150E+4 | 1.0191377E+0 | 1.2324150E+4 | 1.0339589E+0 |
| 1.2324360E+4 | 1.0645113E+0 | 1.2324360E+4 | 1.0206506E+0 | 1.2324360E+4 | 1.0366177E+0 |
| 1.2324550E+4 | 1.0653797E+0 | 1.2324550E+4 | 1.0185608E+0 | 1.2324550E+4 | 1.0298645E+0 |
| 1.2324750E+4 | 1.0631543E+0 | 1.2324750E+4 | 1.0136833E+0 | 1.2324750E+4 | 1.0242024E+0 |
| 1.2324940E+4 | 1.0621019E+0 | 1.2324940E+4 | 1.0185235E+0 | 1.2324940E+4 | 1.0293208E+0 |
| 1.2325160E+4 | 1.0623446E+0 | 1.2325160E+4 | 1.0214629E+0 | 1.2325160E+4 | 1.0306321E+0 |
| 1.2325370E+4 | 1.0599238E+0 | 1.2325370E+4 | 1.0176225E+0 | 1.2325370E+4 | 1.0320765E+0 |
| 1.2325590E+4 | 1.0644922E+0 | 1.2325590E+4 | 1.0187444E+0 | 1.2325590E+4 | 1.0251536E+0 |
| 1.2325800E+4 | 1.0676721E+0 | 1.2325800E+4 | 1.0088840E+0 | 1.2325800E+4 | 1.0241448E+0 |
| 1.2326010E+4 | 1.0627356E+0 | 1.2326010E+4 | 1.0159751E+0 | 1.2326010E+4 | 1.0289202E+0 |
| 1.2326210E+4 | 1.0633817E+0 | 1.2326210E+4 | 1.0091721E+0 | 1.2326210E+4 | 1.0317731E+0 |
| 1.2326410E+4 | 1.0637625E+0 | 1.2326410E+4 | 1.0083284E+0 | 1.2326410E+4 | 1.0262000E+0 |
| 1.2326610E+4 | 1.0618692E+0 | 1.2326610E+4 | 1.0057749E+0 | 1.2326610E+4 | 1.0214000E+0 |
| 1.2326820E+4 | 1.0617931E+0 | 1.2326820E+4 | 1.0040685E+0 | 1.2326820E+4 | 1.0261000E+0 |
| 1.2327040E+4 | 1.0568344E+0 | 1.2327040E+4 | 1.0022128E+0 | 1.2327040E+4 | 1.0208057E+0 |
| 1.2327260E+4 | 1.0550885E+0 | 1.2327260E+4 | 1.0053046E+0 | 1.2327260E+4 | 1.0231981E+0 |
| 1.2327480E+4 | 1.0621450E+0 | 1.2327480E+4 | 1.0061567E+0 | 1.2327480E+4 | 1.0235145E+0 |
| 1.2327700E+4 | 1.0601505E+0 | 1.2327700E+4 | 1.0040802E+0 | 1.2327700E+4 | 1.0214099E+0 |
| 1.2327890E+4 | 1.0545206E+0 | 1.2327890E+4 | 9.9953916E-1 | 1.2327890E+4 | 1.0160507E+0 |
| 1.2328080E+4 | 1.0578064E+0 | 1.2328080E+4 | 9.9573706E-1 | 1.2328080E+4 | 1.0180019E+0 |
| 1.2328270E+4 | 1.0572409E+0 | 1.2328270E+4 | 9.9341381E-1 | 1.2328270E+4 | 1.0179519E+0 |
| 1.2328460E+4 | 1.0547056E+0 | 1.2328460E+4 | 9.8951157E-1 | 1.2328460E+4 | 1.0122617E+0 |
| 1.2328670E+4 | 1.0525424E+0 | 1.2328670E+4 | 9.8713033E-1 | 1.2328670E+4 | 1.0153665E+0 |
| 1.2328870E+4 | 1.0537951E+0 | 1.2328870E+4 | 9.8760298E-1 | 1.2328870E+4 | 1.0189490E+0 |
| 1.2329080E+4 | 1.0534322E+0 | 1.2329080E+4 | 9.8750868E-1 | 1.2329080E+4 | 1.0180152E+0 |
| 1.2329280E+4 | 1.0509524E+0 | 1.2329280E+4 | 9.9103277E-1 | 1.2329280E+4 | 1.0138125E+0 |
| 1.2329470E+4 | 1.0510582E+0 | 1.2329470E+4 | 9.8213334E-1 | 1.2329470E+4 | 1.0088827E+0 |
| 1.2329650E+4 | 1.0524824E+0 | 1.2329650E+4 | 9.8258262E-1 | 1.2329650E+4 | 1.0111260E+0 |
| 1.2329830E+4 | 1.0519860E+0 | 1.2329830E+4 | 9.8573670E-1 | 1.2329830E+4 | 1.0098926E+0 |
| 1.2330010E+4 | 1.0493394E+0 | 1.2330010E+4 | 9.7972610E-1 | 1.2330010E+4 | 1.0068915E+0 |
| 1.2330210E+4 | 1.0522556E+0 | 1.2330210E+4 | 9.7619057E-1 | 1.2330210E+4 | 1.0060684E+0 |
| 1.2330410E+4 | 1.0453296E+0 | 1.2330410E+4 | 9.7819850E-1 | 1.2330410E+4 | 1.0073400E+0 |
| 1.2330610E+4 | 1.0427648E+0 | 1.2330610E+4 | 9.7967874E-1 | 1.2330610E+4 | 1.0033535E+0 |
| 1.2330820E+4 | 1.0482837E+0 | 1.2330820E+4 | 9.6959633E-1 | 1.2330820E+4 | 9.9679066E-1 |
| 1.2331010E+4 | 1.0458791E+0 | 1.2331010E+4 | 9.6456819E-1 | 1.2331010E+4 | 1.0031174E+0 |

|                           |                           |                           |
|---------------------------|---------------------------|---------------------------|
| 1.2331200E+4 1.0463970E+0 | 1.2331200E+4 9.6815594E-1 | 1.2331200E+4 9.9770444E-1 |
| 1.2331380E+4 1.0459817E+0 | 1.2331380E+4 9.7253273E-1 | 1.2331380E+4 9.9789165E-1 |
| 1.2331560E+4 1.0426518E+0 | 1.2331560E+4 9.6394753E-1 | 1.2331560E+4 9.9270761E-1 |
| 1.2331780E+4 1.0445849E+0 | 1.2331780E+4 9.6617520E-1 | 1.2331780E+4 9.9669584E-1 |
| 1.2331990E+4 1.0404690E+0 | 1.2331990E+4 9.6566328E-1 | 1.2331990E+4 9.9164235E-1 |
| 1.2332200E+4 1.0401433E+0 | 1.2332200E+4 9.6066309E-1 | 1.2332200E+4 9.9442986E-1 |
| 1.2332400E+4 1.0418877E+0 | 1.2332400E+4 9.6338980E-1 | 1.2332400E+4 1.0018139E+0 |
| 1.2332600E+4 1.0404342E+0 | 1.2332600E+4 9.6514449E-1 | 1.2332600E+4 9.9370838E-1 |
| 1.2332800E+4 1.0422684E+0 | 1.2332800E+4 9.6129554E-1 | 1.2332800E+4 9.9280053E-1 |
| 1.2332990E+4 1.0387904E+0 | 1.2332990E+4 9.6668339E-1 | 1.2332990E+4 9.9132158E-1 |
| 1.2333170E+4 1.0334776E+0 | 1.2333170E+4 9.6419245E-1 | 1.2333170E+4 9.9201586E-1 |
| 1.2333360E+4 1.0360898E+0 | 1.2333360E+4 9.5693053E-1 | 1.2333360E+4 9.9110587E-1 |
| 1.2333560E+4 1.0316185E+0 | 1.2333560E+4 9.5599993E-1 | 1.2333560E+4 9.8952133E-1 |
| 1.2333760E+4 1.0281000E+0 | 1.2333760E+4 9.5615044E-1 | 1.2333760E+4 9.8464552E-1 |
| 1.2333970E+4 1.0292859E+0 | 1.2333970E+4 9.5871017E-1 | 1.2333970E+4 9.8484853E-1 |
| 1.2334160E+4 1.0312323E+0 | 1.2334160E+4 9.6165535E-1 | 1.2334160E+4 9.8734545E-1 |
| 1.2334350E+4 1.0295171E+0 | 1.2334350E+4 9.5671875E-1 | 1.2334350E+4 9.8541781E-1 |
| 1.2334530E+4 1.0263039E+0 | 1.2334530E+4 9.5740771E-1 | 1.2334530E+4 9.8386684E-1 |
| 1.2334710E+4 1.0300096E+0 | 1.2334710E+4 9.5898064E-1 | 1.2334710E+4 9.8303982E-1 |
| 1.2334900E+4 1.0328346E+0 | 1.2334900E+4 9.5254139E-1 | 1.2334900E+4 9.8240783E-1 |
| 1.2335110E+4 1.0279153E+0 | 1.2335110E+4 9.5206686E-1 | 1.2335110E+4 9.8286560E-1 |
| 1.2335320E+4 1.0226878E+0 | 1.2335320E+4 9.5017176E-1 | 1.2335320E+4 9.7741315E-1 |
| 1.2335540E+4 1.0234923E+0 | 1.2335540E+4 9.5350957E-1 | 1.2335540E+4 9.7708353E-1 |
| 1.2335750E+4 1.0189758E+0 | 1.2335750E+4 9.5656629E-1 | 1.2335750E+4 9.7813898E-1 |
| 1.2335960E+4 1.0219900E+0 | 1.2335960E+4 9.5485214E-1 | 1.2335960E+4 9.7662036E-1 |
| 1.2336160E+4 1.0227896E+0 | 1.2336160E+4 9.5155756E-1 | 1.2336160E+4 9.7461288E-1 |
| 1.2336360E+4 1.0190699E+0 | 1.2336360E+4 9.5027279E-1 | 1.2336360E+4 9.7547278E-1 |
| 1.2336560E+4 1.0190667E+0 | 1.2336560E+4 9.5251828E-1 | 1.2336560E+4 9.7330385E-1 |
| 1.2336760E+4 1.0164364E+0 | 1.2336760E+4 9.5383929E-1 | 1.2336760E+4 9.7750951E-1 |
| 1.2336980E+4 1.0199830E+0 | 1.2336980E+4 9.5527129E-1 | 1.2336980E+4 9.7088340E-1 |
| 1.2337200E+4 1.0170068E+0 | 1.2337200E+4 9.5752504E-1 | 1.2337200E+4 9.6826890E-1 |
| 1.2337410E+4 1.0124353E+0 | 1.2337410E+4 9.5383760E-1 | 1.2337410E+4 9.7480853E-1 |
| 1.2337620E+4 1.0166648E+0 | 1.2337620E+4 9.5449618E-1 | 1.2337620E+4 9.7193150E-1 |
| 1.2337810E+4 1.0184881E+0 | 1.2337810E+4 9.5016715E-1 | 1.2337810E+4 9.6654716E-1 |
| 1.2338010E+4 1.0162297E+0 | 1.2338010E+4 9.5150512E-1 | 1.2338010E+4 9.6824033E-1 |
| 1.2338190E+4 1.0107111E+0 | 1.2338190E+4 9.5528346E-1 | 1.2338190E+4 9.6907555E-1 |
| 1.2338390E+4 1.0071044E+0 | 1.2338390E+4 9.5211506E-1 | 1.2338390E+4 9.6763702E-1 |
| 1.2338590E+4 1.0094899E+0 | 1.2338590E+4 9.5273865E-1 | 1.2338590E+4 9.6913922E-1 |
| 1.2338800E+4 1.0105643E+0 | 1.2338800E+4 9.5212634E-1 | 1.2338800E+4 9.6353018E-1 |
| 1.2339010E+4 1.0095158E+0 | 1.2339010E+4 9.4789774E-1 | 1.2339010E+4 9.6547551E-1 |
| 1.2339210E+4 1.0079661E+0 | 1.2339210E+4 9.5438962E-1 | 1.2339210E+4 9.7095000E-1 |
| 1.2339420E+4 1.0058617E+0 | 1.2339420E+4 9.5655473E-1 | 1.2339420E+4 9.6087401E-1 |
| 1.2339620E+4 1.0020944E+0 | 1.2339620E+4 9.5117372E-1 | 1.2339620E+4 9.6396320E-1 |
| 1.2339810E+4 1.0029644E+0 | 1.2339810E+4 9.5233628E-1 | 1.2339810E+4 9.6448836E-1 |
| 1.2340000E+4 1.0061594E+0 | 1.2340000E+4 9.4746211E-1 | 1.2340000E+4 9.6430379E-1 |
| 1.2340210E+4 1.0033874E+0 | 1.2340210E+4 9.4773825E-1 | 1.2340210E+4 9.6217938E-1 |
| 1.2340410E+4 9.9868131E-1 | 1.2340410E+4 9.5314715E-1 | 1.2340410E+4 9.6417094E-1 |
| 1.2340630E+4 9.9725508E-1 | 1.2340630E+4 9.5201657E-1 | 1.2340630E+4 9.5529033E-1 |
| 1.2340840E+4 9.9713076E-1 | 1.2340840E+4 9.5586582E-1 | 1.2340840E+4 9.6958003E-1 |
| 1.2341040E+4 1.0006272E+0 | 1.2341040E+4 9.5672868E-1 | 1.2341040E+4 9.6085780E-1 |
| 1.2341230E+4 1.0005955E+0 | 1.2341230E+4 9.5398171E-1 | 1.2341230E+4 9.6522453E-1 |
| 1.2341420E+4 9.9735915E-1 | 1.2341420E+4 9.5229985E-1 | 1.2341420E+4 9.6019361E-1 |

1.2341600E+4 9.9686249E-1 1.2341600E+4 9.4967393E-1 1.2341600E+4 9.6223872E-1  
1.2341790E+4 9.9880531E-1 1.2341790E+4 9.4774638E-1 1.2341790E+4 9.5968000E-1  
1.2341980E+4 9.9832259E-1 1.2341980E+4 9.5204515E-1 1.2341980E+4 9.6237161E-1  
1.2342190E+4 9.9454996E-1 1.2342190E+4 9.5311396E-1 1.2342190E+4 9.6166483E-1  
1.2342390E+4 9.9343595E-1 1.2342390E+4 9.5013923E-1 1.2342390E+4 9.6400415E-1  
1.2342580E+4 9.9629802E-1 1.2342580E+4 9.4673841E-1 1.2342580E+4 9.6772144E-1  
1.2342770E+4 9.9720193E-1 1.2342770E+4 9.4882983E-1 1.2342770E+4 9.6796968E-1  
1.2342950E+4 9.9695144E-1 1.2342950E+4 9.4897492E-1 1.2342950E+4 9.6322451E-1  
1.2343130E+4 9.9254980E-1 1.2343130E+4 9.5282906E-1 1.2343130E+4 9.6104330E-1  
1.2343310E+4 9.9234895E-1 1.2343310E+4 9.5852473E-1 1.2343310E+4 9.6871180E-1  
1.2343500E+4 9.9465957E-1 1.2343500E+4 9.5355605E-1 1.2343500E+4 9.6809022E-1  
1.2343690E+4 9.8826785E-1 1.2343690E+4 9.5458174E-1 1.2343690E+4 9.6454858E-1  
1.2343900E+4 9.8620030E-1 1.2343900E+4 9.5019460E-1 1.2343900E+4 9.6286359E-1  
1.2344110E+4 9.8973082E-1 1.2344110E+4 9.4838470E-1 1.2344110E+4 9.5796618E-1  
1.2344310E+4 9.8937769E-1 1.2344310E+4 9.5320371E-1 1.2344310E+4 9.7118227E-1  
1.2344500E+4 9.8941001E-1 1.2344500E+4 9.5320904E-1 1.2344500E+4 9.7164072E-1  
1.2344680E+4 9.9294523E-1 1.2344680E+4 9.5689403E-1 1.2344680E+4 9.6270934E-1  
1.2344860E+4 9.9291267E-1 1.2344860E+4 9.5385440E-1 1.2344860E+4 9.7136658E-1  
1.2345060E+4 9.8898677E-1 1.2345060E+4 9.5463792E-1 1.2345060E+4 9.6931996E-1  
1.2345280E+4 9.9101131E-1 1.2345280E+4 9.5433177E-1 1.2345280E+4 9.6381692E-1  
1.2345500E+4 9.8690904E-1 1.2345500E+4 9.4883561E-1 1.2345500E+4 9.6754674E-1  
1.2345710E+4 9.8431710E-1 1.2345710E+4 9.5084988E-1 1.2345710E+4 9.6772176E-1  
1.2345910E+4 9.8578984E-1 1.2345910E+4 9.5682606E-1 1.2345910E+4 9.6963776E-1  
1.2346110E+4 9.8775084E-1 1.2346110E+4 9.5853050E-1 1.2346110E+4 9.6923779E-1  
1.2346290E+4 9.8623304E-1 1.2346290E+4 9.6026548E-1 1.2346290E+4 9.7052081E-1  
1.2346480E+4 9.8948186E-1 1.2346480E+4 9.6140312E-1 1.2346480E+4 9.7344684E-1  
1.2346670E+4 9.9134873E-1 1.2346670E+4 9.5645055E-1 1.2346670E+4 9.7369589E-1  
1.2346870E+4 9.9022071E-1 1.2346870E+4 9.5458889E-1 1.2346870E+4 9.6689029E-1  
1.2347070E+4 9.8896725E-1 1.2347070E+4 9.5614265E-1 1.2347070E+4 9.7043090E-1  
1.2347270E+4 9.9188935E-1 1.2347270E+4 9.5670670E-1 1.2347270E+4 9.7451949E-1  
1.2347460E+4 9.8886539E-1 1.2347460E+4 9.6388537E-1 1.2347460E+4 9.7567532E-1  
1.2347650E+4 9.8761621E-1 1.2347650E+4 9.6569437E-1 1.2347650E+4 9.7059698E-1  
1.2347840E+4 9.9105313E-1 1.2347840E+4 9.6441308E-1 1.2347840E+4 9.6504594E-1  
1.2348020E+4 9.8869794E-1 1.2348020E+4 9.6269966E-1 1.2348020E+4 9.7109870E-1  
1.2348210E+4 9.8930554E-1 1.2348210E+4 9.6939864E-1 1.2348210E+4 9.7617580E-1  
1.2348420E+4 9.9097050E-1 1.2348420E+4 9.6718763E-1 1.2348420E+4 9.7468209E-1  
1.2348630E+4 9.9187555E-1 1.2348630E+4 9.6648228E-1 1.2348630E+4 9.7411457E-1  
1.2348860E+4 9.8406339E-1 1.2348860E+4 9.6912315E-1 1.2348860E+4 9.7877445E-1  
1.2349070E+4 9.8537341E-1 1.2349070E+4 9.6975108E-1 1.2349070E+4 9.7608200E-1  
1.2349280E+4 9.8965013E-1 1.2349280E+4 9.6981231E-1 1.2349280E+4 9.7548083E-1  
1.2349490E+4 9.8627773E-1 1.2349490E+4 9.7580974E-1 1.2349490E+4 9.7908991E-1  
1.2349680E+4 9.8753044E-1 1.2349680E+4 9.7754514E-1 1.2349680E+4 9.7818511E-1  
1.2349890E+4 9.8901437E-1 1.2349890E+4 9.7567229E-1 1.2349890E+4 9.7904242E-1  
1.2350090E+4 9.9297333E-1 1.2350090E+4 9.7253419E-1 1.2350090E+4 9.7856142E-1  
1.2350300E+4 9.8516374E-1 1.2350300E+4 9.7290591E-1 1.2350300E+4 9.7719436E-1  
1.2350530E+4 9.8504070E-1 1.2350530E+4 9.7974667E-1 1.2350530E+4 9.8042902E-1  
1.2350740E+4 9.8887286E-1 1.2350740E+4 9.8194976E-1 1.2350740E+4 9.8075321E-1  
1.2350950E+4 9.8921630E-1 1.2350950E+4 9.8136401E-1 1.2350950E+4 9.8760400E-1  
1.2351160E+4 9.9062550E-1 1.2351160E+4 9.8657130E-1 1.2351160E+4 9.8592360E-1  
1.2351360E+4 9.9214399E-1 1.2351360E+4 9.8135562E-1 1.2351360E+4 9.7822570E-1  
1.2351550E+4 9.9355746E-1 1.2351550E+4 9.8436176E-1 1.2351550E+4 9.8545220E-1  
1.2351740E+4 9.9147195E-1 1.2351740E+4 9.8720200E-1 1.2351740E+4 9.8800595E-1



|                           |                           |                           |
|---------------------------|---------------------------|---------------------------|
| 1.2351960E+4 9.9371000E-1 | 1.2351960E+4 9.8263833E-1 | 1.2351960E+4 9.9252273E-1 |
| 1.2352180E+4 9.9024226E-1 | 1.2352180E+4 9.9367087E-1 | 1.2352180E+4 9.8757735E-1 |
| 1.2352400E+4 9.9179616E-1 | 1.2352400E+4 9.9985368E-1 | 1.2352400E+4 9.8146296E-1 |
| 1.2352620E+4 9.9286903E-1 | 1.2352620E+4 9.9018239E-1 | 1.2352620E+4 9.8551986E-1 |
| 1.2352820E+4 9.9312969E-1 | 1.2352820E+4 9.9479065E-1 | 1.2352820E+4 9.9254424E-1 |
| 1.2353030E+4 9.9342616E-1 | 1.2353030E+4 9.9637867E-1 | 1.2353030E+4 9.8776945E-1 |
| 1.2353230E+4 9.9774109E-1 | 1.2353230E+4 9.9217774E-1 | 1.2353230E+4 9.8965621E-1 |
| 1.2353420E+4 9.9666470E-1 | 1.2353420E+4 9.9237206E-1 | 1.2353420E+4 9.8670816E-1 |
| 1.2353620E+4 9.9376508E-1 | 1.2353620E+4 9.9378273E-1 | 1.2353620E+4 9.8877000E-1 |
| 1.2353840E+4 9.9356052E-1 | 1.2353840E+4 9.9487605E-1 | 1.2353840E+4 9.9303808E-1 |
| 1.2354060E+4 9.9334028E-1 | 1.2354060E+4 1.0031790E+0 | 1.2354060E+4 9.9956810E-1 |
| 1.2354290E+4 9.9545288E-1 | 1.2354290E+4 9.9436432E-1 | 1.2354290E+4 9.9416747E-1 |
| 1.2354500E+4 9.9194765E-1 | 1.2354500E+4 9.9628410E-1 | 1.2354500E+4 9.9203543E-1 |
| 1.2354690E+4 9.9359703E-1 | 1.2354690E+4 9.9880095E-1 | 1.2354690E+4 9.9695403E-1 |
| 1.2354890E+4 1.0005708E+0 | 1.2354890E+4 9.9821959E-1 | 1.2354890E+4 9.9608189E-1 |
| 1.2355070E+4 9.9951233E-1 | 1.2355070E+4 9.9978903E-1 | 1.2355070E+4 1.0001744E+0 |
| 1.2355270E+4 1.0031227E+0 | 1.2355270E+4 1.0010999E+0 | 1.2355270E+4 9.9351000E-1 |
| 1.2355470E+4 1.0008590E+0 | 1.2355470E+4 9.9884947E-1 | 1.2355470E+4 9.9132253E-1 |
| 1.2355680E+4 1.0010899E+0 | 1.2355680E+4 9.9839113E-1 | 1.2355680E+4 9.9661329E-1 |
| 1.2355890E+4 9.9862540E-1 | 1.2355890E+4 1.0027256E+0 | 1.2355890E+4 1.0025689E+0 |
| 1.2356080E+4 1.0004276E+0 | 1.2356080E+4 1.0034884E+0 | 1.2356080E+4 1.0042133E+0 |
| 1.2356280E+4 9.9785124E-1 | 1.2356280E+4 1.0013211E+0 | 1.2356280E+4 1.0002715E+0 |
| 1.2356470E+4 1.0015172E+0 | 1.2356470E+4 1.0060071E+0 | 1.2356470E+4 9.9287412E-1 |

### Hg(SR)<sub>3</sub>

1.2258820E+4 8.2137000E-5  
1.2258840E+4 9.3356000E-5  
1.2258980E+4 2.9279000E-4  
1.2259200E+4 1.0160000E-4  
1.2259410E+4 1.1997821E-5  
1.2259620E+4 5.9222839E-5  
1.2259820E+4 6.7677286E-5  
1.2260020E+4 6.6575450E-5  
1.2260210E+4 1.1525363E-4  
1.2260400E+4 1.3358196E-4  
1.2260590E+4 8.2602259E-5  
1.2260800E+4 9.0672745E-5  
1.2261020E+4 1.0395420E-4  
1.2261230E+4 1.4588806E-4  
1.2261440E+4 1.2882540E-4  
1.2261630E+4 9.1491050E-5  
1.2261830E+4 1.2204189E-4  
1.2262010E+4 1.4765163E-4  
1.2262190E+4 1.5182299E-4  
1.2262390E+4 1.6792420E-4  
1.2262600E+4 1.7252637E-4  
1.2262800E+4 1.8368653E-4  
1.2263000E+4 1.3988034E-4  
1.2263190E+4 2.3067434E-4  
1.2263370E+4 2.0058951E-4  
1.2263540E+4 1.8209966E-4  
1.2263710E+4 2.3057713E-4

### Hg(PC2)

1.2258820E+4 8.4837000E-5  
1.2258840E+4 9.3373000E-5  
1.2258980E+4 2.1279000E-4  
1.2259200E+4 0.0000000E+0  
1.2259410E+4 2.0630000E-4  
1.2259620E+4 1.9205000E-4  
1.2259820E+4 1.1430000E-4  
1.2260020E+4 1.8970000E-4  
1.2260210E+4 1.8316000E-4  
1.2260400E+4 2.2529000E-4  
1.2260590E+4 1.7395000E-4  
1.2260800E+4 2.3655000E-4  
1.2261020E+4 1.6034000E-4  
1.2261230E+4 2.8086000E-4  
1.2261440E+4 2.1084000E-4  
1.2261630E+4 1.4807000E-4  
1.2261830E+4 1.5691000E-4  
1.2262010E+4 2.3473000E-4  
1.2262190E+4 1.8187000E-4  
1.2262390E+4 2.5523000E-4  
1.2262600E+4 2.9351000E-4  
1.2262800E+4 2.9599000E-4  
1.2263000E+4 3.5985000E-4  
1.2263190E+4 2.8714000E-4  
1.2263370E+4 3.2689000E-4  
1.2263540E+4 3.1989000E-4  
1.2263710E+4 3.5693000E-4

### Hg(Cys)<sub>4</sub>

1.2258820E+4 8.4297000E-5  
1.2258840E+4 9.3183000E-5  
1.2258980E+4 2.0079000E-4  
1.2259200E+4 0.0120000E+0  
1.2259410E+4 2.0030000E-4  
1.2259620E+4 1.9105000E-4  
1.2259820E+4 3.0249801E-4  
1.2260020E+4 4.8345085E-4  
1.2260210E+4 6.4392800E-4  
1.2260400E+4 5.5144199E-4  
1.2260590E+4 3.4846652E-4  
1.2260800E+4 2.1092944E-4  
1.2261020E+4 2.6751584E-4  
1.2261230E+4 5.1496760E-4  
1.2261440E+4 4.5830001E-4  
1.2261630E+4 4.0206037E-4  
1.2261830E+4 5.4299845E-4  
1.2262010E+4 5.7013522E-4  
1.2262190E+4 4.6601131E-4  
1.2262390E+4 3.5371978E-4  
1.2262600E+4 3.2252248E-4  
1.2262800E+4 3.0621712E-4  
1.2263000E+4 5.8822441E-4  
1.2263190E+4 6.5225708E-4  
1.2263370E+4 5.9527714E-4  
1.2263540E+4 3.2100332E-4  
1.2263710E+4 4.7356940E-4

|              |              |              |              |              |              |
|--------------|--------------|--------------|--------------|--------------|--------------|
| 1.2263890E+4 | 2.1395314E-4 | 1.2263890E+4 | 3.6861000E-4 | 1.2263890E+4 | 5.4628145E-4 |
| 1.2264080E+4 | 2.8146545E-4 | 1.2264080E+4 | 4.9558000E-4 | 1.2264080E+4 | 6.3848328E-4 |
| 1.2264270E+4 | 2.8748464E-4 | 1.2264270E+4 | 3.3569000E-4 | 1.2264270E+4 | 5.6974747E-4 |
| 1.2264460E+4 | 2.7451825E-4 | 1.2264460E+4 | 4.4153000E-4 | 1.2264460E+4 | 6.8825999E-4 |
| 1.2264660E+4 | 2.5519272E-4 | 1.2264660E+4 | 4.0898000E-4 | 1.2264660E+4 | 5.6947617E-4 |
| 1.2264840E+4 | 3.4782851E-4 | 1.2264840E+4 | 4.4075000E-4 | 1.2264840E+4 | 5.2865789E-4 |
| 1.2265020E+4 | 4.4411531E-4 | 1.2265020E+4 | 4.5381000E-4 | 1.2265020E+4 | 5.6592429E-4 |
| 1.2265200E+4 | 3.9050566E-4 | 1.2265200E+4 | 4.8053000E-4 | 1.2265200E+4 | 7.5266562E-4 |
| 1.2265390E+4 | 3.6605000E-4 | 1.2265390E+4 | 6.1214000E-4 | 1.2265390E+4 | 8.3380866E-4 |
| 1.2265590E+4 | 3.5325116E-4 | 1.2265590E+4 | 5.8583000E-4 | 1.2265590E+4 | 5.3023275E-4 |
| 1.2265790E+4 | 4.8592479E-4 | 1.2265790E+4 | 5.0760000E-4 | 1.2265790E+4 | 4.1238661E-4 |
| 1.2265990E+4 | 4.5587516E-4 | 1.2265990E+4 | 6.6583000E-4 | 1.2265990E+4 | 5.8701310E-4 |
| 1.2266190E+4 | 5.2448071E-4 | 1.2266190E+4 | 4.3892000E-4 | 1.2266190E+4 | 6.8289043E-4 |
| 1.2266380E+4 | 5.2719634E-4 | 1.2266380E+4 | 6.7310000E-4 | 1.2266380E+4 | 1.0636606E-3 |
| 1.2266560E+4 | 4.6980458E-4 | 1.2266560E+4 | 7.7664000E-4 | 1.2266560E+4 | 1.0089320E-3 |
| 1.2266740E+4 | 5.6841650E-4 | 1.2266740E+4 | 6.4894000E-4 | 1.2266740E+4 | 1.0003442E-3 |
| 1.2266920E+4 | 6.4595055E-4 | 1.2266920E+4 | 8.4145000E-4 | 1.2266920E+4 | 6.1336701E-4 |
| 1.2267110E+4 | 6.5701813E-4 | 1.2267110E+4 | 8.7882000E-4 | 1.2267110E+4 | 8.9072625E-4 |
| 1.2267310E+4 | 6.3865945E-4 | 1.2267310E+4 | 9.0564000E-4 | 1.2267310E+4 | 8.0120956E-4 |
| 1.2267500E+4 | 7.1350817E-4 | 1.2267500E+4 | 1.0451000E-3 | 1.2267500E+4 | 9.4538839E-4 |
| 1.2267700E+4 | 7.7242000E-4 | 1.2267700E+4 | 1.0886000E-3 | 1.2267700E+4 | 1.0188520E-3 |
| 1.2267880E+4 | 8.6200000E-4 | 1.2267880E+4 | 1.1931000E-3 | 1.2267880E+4 | 1.0902495E-3 |
| 1.2268060E+4 | 9.0840636E-4 | 1.2268060E+4 | 1.0968000E-3 | 1.2268060E+4 | 9.9549735E-4 |
| 1.2268230E+4 | 9.7162000E-4 | 1.2268230E+4 | 1.3141000E-3 | 1.2268230E+4 | 1.0584871E-3 |
| 1.2268410E+4 | 1.0759484E-3 | 1.2268410E+4 | 1.2474000E-3 | 1.2268410E+4 | 1.0448991E-3 |
| 1.2268590E+4 | 1.1270969E-3 | 1.2268590E+4 | 1.1071000E-3 | 1.2268590E+4 | 1.1200644E-3 |
| 1.2268790E+4 | 1.1111263E-3 | 1.2268790E+4 | 1.3196000E-3 | 1.2268790E+4 | 1.4163113E-3 |
| 1.2268990E+4 | 1.1265882E-3 | 1.2268990E+4 | 1.5287000E-3 | 1.2268990E+4 | 1.5825896E-3 |
| 1.2269200E+4 | 1.2677001E-3 | 1.2269200E+4 | 1.4578000E-3 | 1.2269200E+4 | 1.3435966E-3 |
| 1.2269400E+4 | 1.5486924E-3 | 1.2269400E+4 | 1.7157000E-3 | 1.2269400E+4 | 1.7443027E-3 |
| 1.2269590E+4 | 1.4648795E-3 | 1.2269590E+4 | 1.9391000E-3 | 1.2269590E+4 | 1.7702457E-3 |
| 1.2269770E+4 | 1.5662890E-3 | 1.2269770E+4 | 2.0446000E-3 | 1.2269770E+4 | 1.8309415E-3 |
| 1.2269960E+4 | 1.7802801E-3 | 1.2269960E+4 | 2.1744000E-3 | 1.2269960E+4 | 2.0100826E-3 |
| 1.2270150E+4 | 1.8852198E-3 | 1.2270150E+4 | 2.3027000E-3 | 1.2270150E+4 | 2.1909000E-3 |
| 1.2270370E+4 | 2.0697521E-3 | 1.2270370E+4 | 2.4467000E-3 | 1.2270370E+4 | 2.5283671E-3 |
| 1.2270580E+4 | 2.3304166E-3 | 1.2270580E+4 | 2.6940000E-3 | 1.2270580E+4 | 2.4678010E-3 |
| 1.2270800E+4 | 2.4480428E-3 | 1.2270800E+4 | 2.9041000E-3 | 1.2270800E+4 | 2.5066277E-3 |
| 1.2271010E+4 | 2.5679913E-3 | 1.2271010E+4 | 3.2195000E-3 | 1.2271010E+4 | 2.8483846E-3 |
| 1.2271220E+4 | 2.8495651E-3 | 1.2271220E+4 | 3.4585000E-3 | 1.2271220E+4 | 3.1541495E-3 |
| 1.2271410E+4 | 3.1473080E-3 | 1.2271410E+4 | 3.5979000E-3 | 1.2271410E+4 | 3.4942036E-3 |
| 1.2271590E+4 | 3.4140065E-3 | 1.2271590E+4 | 4.0200000E-3 | 1.2271590E+4 | 3.9023273E-3 |
| 1.2271780E+4 | 3.7124040E-3 | 1.2271780E+4 | 4.5185000E-3 | 1.2271780E+4 | 4.0073860E-3 |
| 1.2272000E+4 | 4.1329342E-3 | 1.2272000E+4 | 5.0533000E-3 | 1.2272000E+4 | 4.1923766E-3 |
| 1.2272210E+4 | 4.6141591E-3 | 1.2272210E+4 | 5.6116000E-3 | 1.2272210E+4 | 4.7823859E-3 |
| 1.2272430E+4 | 5.2329215E-3 | 1.2272430E+4 | 6.1355000E-3 | 1.2272430E+4 | 5.2777921E-3 |
| 1.2272640E+4 | 5.7371415E-3 | 1.2272640E+4 | 6.6536000E-3 | 1.2272640E+4 | 5.6341231E-3 |
| 1.2272830E+4 | 6.4783122E-3 | 1.2272830E+4 | 7.5956000E-3 | 1.2272830E+4 | 6.3863334E-3 |
| 1.2273020E+4 | 7.1408801E-3 | 1.2273020E+4 | 8.4722000E-3 | 1.2273020E+4 | 7.1856499E-3 |
| 1.2273210E+4 | 7.8927578E-3 | 1.2273210E+4 | 9.6585000E-3 | 1.2273210E+4 | 8.4565095E-3 |
| 1.2273410E+4 | 8.9752212E-3 | 1.2273410E+4 | 1.0683000E-2 | 1.2273410E+4 | 9.2163254E-3 |
| 1.2273600E+4 | 1.0308180E-2 | 1.2273600E+4 | 1.2192000E-2 | 1.2273600E+4 | 1.0174375E-2 |
| 1.2273820E+4 | 1.1974378E-2 | 1.2273820E+4 | 1.4114000E-2 | 1.2273820E+4 | 1.2055374E-2 |

|              |              |              |              |              |              |
|--------------|--------------|--------------|--------------|--------------|--------------|
| 1.2274020E+4 | 1.3484866E-2 | 1.2274020E+4 | 1.6474000E-2 | 1.2274020E+4 | 1.3753465E-2 |
| 1.2274230E+4 | 1.5497769E-2 | 1.2274230E+4 | 1.8117000E-2 | 1.2274230E+4 | 1.5989883E-2 |
| 1.2274440E+4 | 1.7951403E-2 | 1.2274440E+4 | 2.1499000E-2 | 1.2274440E+4 | 1.8886610E-2 |
| 1.2274630E+4 | 2.0995225E-2 | 1.2274630E+4 | 2.5336000E-2 | 1.2274630E+4 | 2.0989232E-2 |
| 1.2274820E+4 | 2.4314095E-2 | 1.2274820E+4 | 2.9148000E-2 | 1.2274820E+4 | 2.4239710E-2 |
| 1.2275010E+4 | 2.8675608E-2 | 1.2275010E+4 | 3.3640000E-2 | 1.2275010E+4 | 2.8255034E-2 |
| 1.2275210E+4 | 3.4398596E-2 | 1.2275210E+4 | 3.9410000E-2 | 1.2275210E+4 | 3.3779379E-2 |
| 1.2275410E+4 | 4.1292692E-2 | 1.2275410E+4 | 4.7727000E-2 | 1.2275410E+4 | 4.0020013E-2 |
| 1.2275620E+4 | 5.0487140E-2 | 1.2275620E+4 | 5.8489000E-2 | 1.2275620E+4 | 4.7760555E-2 |
| 1.2275820E+4 | 6.1686631E-2 | 1.2275820E+4 | 7.1825000E-2 | 1.2275820E+4 | 5.6673761E-2 |
| 1.2276010E+4 | 7.5282912E-2 | 1.2276010E+4 | 8.6931000E-2 | 1.2276010E+4 | 6.8464662E-2 |
| 1.2276200E+4 | 9.1408815E-2 | 1.2276200E+4 | 1.0566000E-1 | 1.2276200E+4 | 8.0156301E-2 |
| 1.2276380E+4 | 1.1090761E-1 | 1.2276380E+4 | 1.2698000E-1 | 1.2276380E+4 | 9.2439631E-2 |
| 1.2276560E+4 | 1.3374908E-1 | 1.2276560E+4 | 1.5206000E-1 | 1.2276560E+4 | 1.0984296E-1 |
| 1.2276740E+4 | 1.5986185E-1 | 1.2276740E+4 | 1.8174000E-1 | 1.2276740E+4 | 1.2922036E-1 |
| 1.2276930E+4 | 1.8803362E-1 | 1.2276930E+4 | 2.1999000E-1 | 1.2276930E+4 | 1.5217124E-1 |
| 1.2277120E+4 | 2.1983117E-1 | 1.2277120E+4 | 2.6355000E-1 | 1.2277120E+4 | 1.7645940E-1 |
| 1.2277310E+4 | 2.5711636E-1 | 1.2277310E+4 | 3.1055000E-1 | 1.2277310E+4 | 2.0180780E-1 |
| 1.2277510E+4 | 2.9554609E-1 | 1.2277510E+4 | 3.6277000E-1 | 1.2277510E+4 | 2.3247743E-1 |
| 1.2277700E+4 | 3.2903420E-1 | 1.2277700E+4 | 4.1486000E-1 | 1.2277700E+4 | 2.6328960E-1 |
| 1.2277880E+4 | 3.6234680E-1 | 1.2277880E+4 | 4.6145000E-1 | 1.2277880E+4 | 2.9311429E-1 |
| 1.2278060E+4 | 3.9504573E-1 | 1.2278060E+4 | 5.0804000E-1 | 1.2278060E+4 | 3.2314791E-1 |
| 1.2278240E+4 | 4.2358539E-1 | 1.2278240E+4 | 5.5283000E-1 | 1.2278240E+4 | 3.5166105E-1 |
| 1.2278450E+4 | 4.5171986E-1 | 1.2278450E+4 | 5.8982000E-1 | 1.2278450E+4 | 3.8742076E-1 |
| 1.2278660E+4 | 4.7726085E-1 | 1.2278660E+4 | 6.2418000E-1 | 1.2278660E+4 | 4.2363599E-1 |
| 1.2278860E+4 | 4.9708345E-1 | 1.2278860E+4 | 6.4405000E-1 | 1.2278860E+4 | 4.5542208E-1 |
| 1.2279060E+4 | 5.1329837E-1 | 1.2279060E+4 | 6.5696000E-1 | 1.2279060E+4 | 4.8127785E-1 |
| 1.2279260E+4 | 5.2769023E-1 | 1.2279260E+4 | 6.5785000E-1 | 1.2279260E+4 | 5.0587955E-1 |
| 1.2279450E+4 | 5.3691673E-1 | 1.2279450E+4 | 6.4827000E-1 | 1.2279450E+4 | 5.3117017E-1 |
| 1.2279640E+4 | 5.4532680E-1 | 1.2279640E+4 | 6.3394000E-1 | 1.2279640E+4 | 5.5360744E-1 |
| 1.2279830E+4 | 5.5515059E-1 | 1.2279830E+4 | 6.1560000E-1 | 1.2279830E+4 | 5.7346406E-1 |
| 1.2280020E+4 | 5.6338197E-1 | 1.2280020E+4 | 5.9654000E-1 | 1.2280020E+4 | 5.9240867E-1 |
| 1.2280210E+4 | 5.7115528E-1 | 1.2280210E+4 | 5.7211000E-1 | 1.2280210E+4 | 6.1097686E-1 |
| 1.2280420E+4 | 5.8053541E-1 | 1.2280420E+4 | 5.4663000E-1 | 1.2280420E+4 | 6.2591803E-1 |
| 1.2280630E+4 | 5.8537129E-1 | 1.2280630E+4 | 5.2460000E-1 | 1.2280630E+4 | 6.4017442E-1 |
| 1.2280830E+4 | 5.9280522E-1 | 1.2280830E+4 | 5.0771000E-1 | 1.2280830E+4 | 6.5268038E-1 |
| 1.2281010E+4 | 5.9595516E-1 | 1.2281010E+4 | 4.9667000E-1 | 1.2281010E+4 | 6.6159779E-1 |
| 1.2281190E+4 | 5.9748728E-1 | 1.2281190E+4 | 4.8889000E-1 | 1.2281190E+4 | 6.6594190E-1 |
| 1.2281370E+4 | 6.0213738E-1 | 1.2281370E+4 | 4.8493000E-1 | 1.2281370E+4 | 6.6908217E-1 |
| 1.2281560E+4 | 6.0514809E-1 | 1.2281560E+4 | 4.8272000E-1 | 1.2281560E+4 | 6.7560077E-1 |
| 1.2281760E+4 | 6.0387653E-1 | 1.2281760E+4 | 4.8966000E-1 | 1.2281760E+4 | 6.8049824E-1 |
| 1.2281970E+4 | 6.0183811E-1 | 1.2281970E+4 | 4.9424000E-1 | 1.2281970E+4 | 6.8388942E-1 |
| 1.2282180E+4 | 6.0095772E-1 | 1.2282180E+4 | 5.0521000E-1 | 1.2282180E+4 | 6.8611906E-1 |
| 1.2282380E+4 | 6.0471421E-1 | 1.2282380E+4 | 5.1690000E-1 | 1.2282380E+4 | 6.9150252E-1 |
| 1.2282580E+4 | 6.0672995E-1 | 1.2282580E+4 | 5.3417000E-1 | 1.2282580E+4 | 6.9477803E-1 |
| 1.2282790E+4 | 6.0771406E-1 | 1.2282790E+4 | 5.4968000E-1 | 1.2282790E+4 | 7.0005000E-1 |
| 1.2282990E+4 | 6.1438131E-1 | 1.2282990E+4 | 5.6673000E-1 | 1.2282990E+4 | 7.0583530E-1 |
| 1.2283180E+4 | 6.1841293E-1 | 1.2283180E+4 | 5.8354000E-1 | 1.2283180E+4 | 7.1167384E-1 |
| 1.2283400E+4 | 6.2728954E-1 | 1.2283400E+4 | 6.0327000E-1 | 1.2283400E+4 | 7.1931088E-1 |
| 1.2283620E+4 | 6.4057870E-1 | 1.2283620E+4 | 6.2494000E-1 | 1.2283620E+4 | 7.2219530E-1 |
| 1.2283840E+4 | 6.5350746E-1 | 1.2283840E+4 | 6.4809000E-1 | 1.2283840E+4 | 7.2720345E-1 |
| 1.2284070E+4 | 6.6786903E-1 | 1.2284070E+4 | 6.6936000E-1 | 1.2284070E+4 | 7.3355871E-1 |

|                           |                           |                           |
|---------------------------|---------------------------|---------------------------|
| 1.2284290E+4 6.8132387E-1 | 1.2284290E+4 6.9377000E-1 | 1.2284290E+4 7.3789561E-1 |
| 1.2284490E+4 6.9616827E-1 | 1.2284490E+4 7.1594000E-1 | 1.2284490E+4 7.3858488E-1 |
| 1.2284680E+4 7.1017519E-1 | 1.2284680E+4 7.3639000E-1 | 1.2284680E+4 7.3906555E-1 |
| 1.2284870E+4 7.2559353E-1 | 1.2284870E+4 7.5270000E-1 | 1.2284870E+4 7.3922564E-1 |
| 1.2285090E+4 7.4409970E-1 | 1.2285090E+4 7.7315000E-1 | 1.2285090E+4 7.4033053E-1 |
| 1.2285300E+4 7.5982199E-1 | 1.2285300E+4 7.9397000E-1 | 1.2285300E+4 7.4308294E-1 |
| 1.2285520E+4 7.7272109E-1 | 1.2285520E+4 8.1256000E-1 | 1.2285520E+4 7.4040405E-1 |
| 1.2285730E+4 7.8664466E-1 | 1.2285730E+4 8.3135000E-1 | 1.2285730E+4 7.3834582E-1 |
| 1.2285940E+4 7.9686073E-1 | 1.2285940E+4 8.4782000E-1 | 1.2285940E+4 7.3729909E-1 |
| 1.2286150E+4 8.0508884E-1 | 1.2286150E+4 8.6049000E-1 | 1.2286150E+4 7.3382168E-1 |
| 1.2286350E+4 8.1469774E-1 | 1.2286350E+4 8.7084000E-1 | 1.2286350E+4 7.3260974E-1 |
| 1.2286540E+4 8.1643151E-1 | 1.2286540E+4 8.7953000E-1 | 1.2286540E+4 7.3107759E-1 |
| 1.2286750E+4 8.1755369E-1 | 1.2286750E+4 8.8770000E-1 | 1.2286750E+4 7.3006512E-1 |
| 1.2286970E+4 8.2392192E-1 | 1.2286970E+4 8.9442000E-1 | 1.2286970E+4 7.3005641E-1 |
| 1.2287190E+4 8.2588742E-1 | 1.2287190E+4 9.0259000E-1 | 1.2287190E+4 7.2518666E-1 |
| 1.2287410E+4 8.2339965E-1 | 1.2287410E+4 9.0670000E-1 | 1.2287410E+4 7.2260390E-1 |
| 1.2287620E+4 8.1964365E-1 | 1.2287620E+4 9.0953000E-1 | 1.2287620E+4 7.2630468E-1 |
| 1.2287830E+4 8.1646924E-1 | 1.2287830E+4 9.1113000E-1 | 1.2287830E+4 7.2893189E-1 |
| 1.2288030E+4 8.1060669E-1 | 1.2288030E+4 9.1204000E-1 | 1.2288030E+4 7.2910348E-1 |
| 1.2288220E+4 8.0798600E-1 | 1.2288220E+4 9.1475000E-1 | 1.2288220E+4 7.3028736E-1 |
| 1.2288410E+4 8.0965375E-1 | 1.2288410E+4 9.2106000E-1 | 1.2288410E+4 7.3247274E-1 |
| 1.2288620E+4 8.0109373E-1 | 1.2288620E+4 9.1829000E-1 | 1.2288620E+4 7.3888509E-1 |
| 1.2288840E+4 7.9824744E-1 | 1.2288840E+4 9.2186000E-1 | 1.2288840E+4 7.4616003E-1 |
| 1.2289040E+4 7.9787201E-1 | 1.2289040E+4 9.2171000E-1 | 1.2289040E+4 7.4870475E-1 |
| 1.2289240E+4 7.9354652E-1 | 1.2289240E+4 9.1955000E-1 | 1.2289240E+4 7.5312754E-1 |
| 1.2289430E+4 7.9346554E-1 | 1.2289430E+4 9.2100000E-1 | 1.2289430E+4 7.5378463E-1 |
| 1.2289620E+4 7.9672049E-1 | 1.2289620E+4 9.2051000E-1 | 1.2289620E+4 7.5977372E-1 |
| 1.2289800E+4 7.9765472E-1 | 1.2289800E+4 9.1962000E-1 | 1.2289800E+4 7.6407614E-1 |
| 1.2289990E+4 7.9558158E-1 | 1.2289990E+4 9.1753000E-1 | 1.2289990E+4 7.7091023E-1 |
| 1.2290170E+4 7.9733864E-1 | 1.2290170E+4 9.1845000E-1 | 1.2290170E+4 7.7723811E-1 |
| 1.2290370E+4 7.9888964E-1 | 1.2290370E+4 9.1664000E-1 | 1.2290370E+4 7.8408880E-1 |
| 1.2290580E+4 8.0241054E-1 | 1.2290580E+4 9.1568000E-1 | 1.2290580E+4 7.8992904E-1 |
| 1.2290780E+4 8.0562627E-1 | 1.2290780E+4 9.1904000E-1 | 1.2290780E+4 7.9494765E-1 |
| 1.2290970E+4 8.0409749E-1 | 1.2290970E+4 9.1661000E-1 | 1.2290970E+4 8.0122421E-1 |
| 1.2291150E+4 8.0820062E-1 | 1.2291150E+4 9.1691000E-1 | 1.2291150E+4 8.0671705E-1 |
| 1.2291340E+4 8.1547627E-1 | 1.2291340E+4 9.1499000E-1 | 1.2291340E+4 8.1589293E-1 |
| 1.2291520E+4 8.1642970E-1 | 1.2291520E+4 9.1404000E-1 | 1.2291520E+4 8.2140807E-1 |
| 1.2291720E+4 8.2283995E-1 | 1.2291720E+4 9.1481000E-1 | 1.2291720E+4 8.2519353E-1 |
| 1.2291930E+4 8.2297801E-1 | 1.2291930E+4 9.1234000E-1 | 1.2291930E+4 8.3239965E-1 |
| 1.2292140E+4 8.2540696E-1 | 1.2292140E+4 9.1040000E-1 | 1.2292140E+4 8.3853926E-1 |
| 1.2292350E+4 8.3185480E-1 | 1.2292350E+4 9.1354000E-1 | 1.2292350E+4 8.4032512E-1 |
| 1.2292550E+4 8.3516587E-1 | 1.2292550E+4 9.1263000E-1 | 1.2292550E+4 8.4807275E-1 |
| 1.2292750E+4 8.4199555E-1 | 1.2292750E+4 9.1318000E-1 | 1.2292750E+4 8.5157206E-1 |
| 1.2292940E+4 8.4563418E-1 | 1.2292940E+4 9.1615000E-1 | 1.2292940E+4 8.5357640E-1 |
| 1.2293130E+4 8.4970743E-1 | 1.2293130E+4 9.1173000E-1 | 1.2293130E+4 8.5616000E-1 |
| 1.2293320E+4 8.5551999E-1 | 1.2293320E+4 9.1409000E-1 | 1.2293320E+4 8.5717958E-1 |
| 1.2293510E+4 8.5740277E-1 | 1.2293510E+4 9.1510000E-1 | 1.2293510E+4 8.5917288E-1 |
| 1.2293720E+4 8.5816476E-1 | 1.2293720E+4 9.1468000E-1 | 1.2293720E+4 8.5963102E-1 |
| 1.2293930E+4 8.6618044E-1 | 1.2293930E+4 9.1653000E-1 | 1.2293930E+4 8.6208316E-1 |
| 1.2294120E+4 8.7181193E-1 | 1.2294120E+4 9.1561000E-1 | 1.2294120E+4 8.6607915E-1 |
| 1.2294310E+4 8.7441298E-1 | 1.2294310E+4 9.2084000E-1 | 1.2294310E+4 8.6717082E-1 |
| 1.2294490E+4 8.7752924E-1 | 1.2294490E+4 9.2089000E-1 | 1.2294490E+4 8.6535362E-1 |

|                           |                           |                           |
|---------------------------|---------------------------|---------------------------|
| 1.2294670E+4 8.8003009E-1 | 1.2294670E+4 9.2400000E-1 | 1.2294670E+4 8.6592323E-1 |
| 1.2294860E+4 8.8602790E-1 | 1.2294860E+4 9.2636000E-1 | 1.2294860E+4 8.7077903E-1 |
| 1.2295060E+4 8.9053934E-1 | 1.2295060E+4 9.2328000E-1 | 1.2295060E+4 8.7428135E-1 |
| 1.2295270E+4 8.9393440E-1 | 1.2295270E+4 9.2420000E-1 | 1.2295270E+4 8.7506370E-1 |
| 1.2295480E+4 8.9213631E-1 | 1.2295480E+4 9.2666000E-1 | 1.2295480E+4 8.7877661E-1 |
| 1.2295690E+4 8.9690826E-1 | 1.2295690E+4 9.2612000E-1 | 1.2295690E+4 8.7841913E-1 |
| 1.2295900E+4 8.9903071E-1 | 1.2295900E+4 9.3158000E-1 | 1.2295900E+4 8.8249000E-1 |
| 1.2296100E+4 9.0025000E-1 | 1.2296100E+4 9.3416000E-1 | 1.2296100E+4 8.8442691E-1 |
| 1.2296300E+4 9.0151850E-1 | 1.2296300E+4 9.3805000E-1 | 1.2296300E+4 8.8482804E-1 |
| 1.2296490E+4 9.0651000E-1 | 1.2296490E+4 9.3869000E-1 | 1.2296490E+4 8.9089955E-1 |
| 1.2296690E+4 9.1227230E-1 | 1.2296690E+4 9.3844000E-1 | 1.2296690E+4 8.9223631E-1 |
| 1.2296900E+4 9.1124809E-1 | 1.2296900E+4 9.4021000E-1 | 1.2296900E+4 8.9402045E-1 |
| 1.2297130E+4 9.1764352E-1 | 1.2297130E+4 9.4359000E-1 | 1.2297130E+4 9.0034091E-1 |
| 1.2297350E+4 9.1660896E-1 | 1.2297350E+4 9.4528000E-1 | 1.2297350E+4 9.0301142E-1 |
| 1.2297550E+4 9.1783840E-1 | 1.2297550E+4 9.4885000E-1 | 1.2297550E+4 9.0839280E-1 |
| 1.2297750E+4 9.1932460E-1 | 1.2297750E+4 9.4779000E-1 | 1.2297750E+4 9.1086297E-1 |
| 1.2297950E+4 9.2465000E-1 | 1.2297950E+4 9.5070000E-1 | 1.2297950E+4 9.1180575E-1 |
| 1.2298140E+4 9.2857000E-1 | 1.2298140E+4 9.5506000E-1 | 1.2298140E+4 9.1465563E-1 |
| 1.2298320E+4 9.2960061E-1 | 1.2298320E+4 9.5846000E-1 | 1.2298320E+4 9.1890899E-1 |
| 1.2298530E+4 9.3115139E-1 | 1.2298530E+4 9.6082000E-1 | 1.2298530E+4 9.2175374E-1 |
| 1.2298740E+4 9.3668844E-1 | 1.2298740E+4 9.6225000E-1 | 1.2298740E+4 9.2335532E-1 |
| 1.2298950E+4 9.3505000E-1 | 1.2298950E+4 9.6645000E-1 | 1.2298950E+4 9.3018438E-1 |
| 1.2299160E+4 9.3623000E-1 | 1.2299160E+4 9.7048000E-1 | 1.2299160E+4 9.3518060E-1 |
| 1.2299370E+4 9.4080000E-1 | 1.2299370E+4 9.7112000E-1 | 1.2299370E+4 9.3827215E-1 |
| 1.2299560E+4 9.3917212E-1 | 1.2299560E+4 9.7577000E-1 | 1.2299560E+4 9.4139492E-1 |
| 1.2299760E+4 9.4106767E-1 | 1.2299760E+4 9.7736000E-1 | 1.2299760E+4 9.4445440E-1 |
| 1.2299950E+4 9.4632731E-1 | 1.2299950E+4 9.8280000E-1 | 1.2299950E+4 9.4888056E-1 |
| 1.2300140E+4 9.4603983E-1 | 1.2300140E+4 9.8311000E-1 | 1.2300140E+4 9.5308723E-1 |
| 1.2300350E+4 9.4862853E-1 | 1.2300350E+4 9.8764000E-1 | 1.2300350E+4 9.5413929E-1 |
| 1.2300570E+4 9.5247000E-1 | 1.2300570E+4 9.8781000E-1 | 1.2300570E+4 9.5547252E-1 |
| 1.2300780E+4 9.5409457E-1 | 1.2300780E+4 9.9524000E-1 | 1.2300780E+4 9.6051826E-1 |
| 1.2300990E+4 9.5055701E-1 | 1.2300990E+4 9.9524000E-1 | 1.2300990E+4 9.6412323E-1 |
| 1.2301180E+4 9.6019971E-1 | 1.2301180E+4 9.9700000E-1 | 1.2301180E+4 9.6859532E-1 |
| 1.2301370E+4 9.6213117E-1 | 1.2301370E+4 1.0025000E+0 | 1.2301370E+4 9.7215937E-1 |
| 1.2301550E+4 9.6329572E-1 | 1.2301550E+4 1.0012000E+0 | 1.2301550E+4 9.7312080E-1 |
| 1.2301750E+4 9.6360759E-1 | 1.2301750E+4 1.0069000E+0 | 1.2301750E+4 9.7717000E-1 |
| 1.2301950E+4 9.6733107E-1 | 1.2301950E+4 1.0073000E+0 | 1.2301950E+4 9.8143000E-1 |
| 1.2302150E+4 9.7125779E-1 | 1.2302150E+4 1.0102000E+0 | 1.2302150E+4 9.8056423E-1 |
| 1.2302350E+4 9.7370000E-1 | 1.2302350E+4 1.0148000E+0 | 1.2302350E+4 9.8074483E-1 |
| 1.2302540E+4 9.7469000E-1 | 1.2302540E+4 1.0194000E+0 | 1.2302540E+4 9.8606477E-1 |
| 1.2302730E+4 9.7504127E-1 | 1.2302730E+4 1.0172000E+0 | 1.2302730E+4 9.9123353E-1 |
| 1.2302910E+4 9.7988530E-1 | 1.2302910E+4 1.0199000E+0 | 1.2302910E+4 9.9047180E-1 |
| 1.2303080E+4 9.8579609E-1 | 1.2303080E+4 1.0214000E+0 | 1.2303080E+4 9.8981845E-1 |
| 1.2303250E+4 9.8071975E-1 | 1.2303250E+4 1.0291000E+0 | 1.2303250E+4 9.9508547E-1 |
| 1.2303430E+4 9.8024950E-1 | 1.2303430E+4 1.0239000E+0 | 1.2303430E+4 1.0006457E+0 |
| 1.2303630E+4 9.8250392E-1 | 1.2303630E+4 1.0272000E+0 | 1.2303630E+4 1.0003832E+0 |
| 1.2303820E+4 9.8536066E-1 | 1.2303820E+4 1.0294000E+0 | 1.2303820E+4 1.0010976E+0 |
| 1.2304020E+4 9.9146717E-1 | 1.2304020E+4 1.0334000E+0 | 1.2304020E+4 1.0056154E+0 |
| 1.2304200E+4 9.8695000E-1 | 1.2304200E+4 1.0305000E+0 | 1.2304200E+4 1.0081431E+0 |
| 1.2304390E+4 9.9253684E-1 | 1.2304390E+4 1.0368000E+0 | 1.2304390E+4 1.0101041E+0 |
| 1.2304570E+4 9.9661408E-1 | 1.2304570E+4 1.0376000E+0 | 1.2304570E+4 1.0129935E+0 |
| 1.2304750E+4 9.9413851E-1 | 1.2304750E+4 1.0390000E+0 | 1.2304750E+4 1.0167316E+0 |

|                           |                           |                           |
|---------------------------|---------------------------|---------------------------|
| 1.2304940E+4 9.9473707E-1 | 1.2304940E+4 1.0391000E+0 | 1.2304940E+4 1.0170810E+0 |
| 1.2305140E+4 9.9860584E-1 | 1.2305140E+4 1.0393000E+0 | 1.2305140E+4 1.0203746E+0 |
| 1.2305350E+4 1.0046106E+0 | 1.2305350E+4 1.0402000E+0 | 1.2305350E+4 1.0256210E+0 |
| 1.2305550E+4 1.0002610E+0 | 1.2305550E+4 1.0433000E+0 | 1.2305550E+4 1.0253978E+0 |
| 1.2305750E+4 1.0063696E+0 | 1.2305750E+4 1.0431000E+0 | 1.2305750E+4 1.0261306E+0 |
| 1.2305950E+4 1.0049758E+0 | 1.2305950E+4 1.0415000E+0 | 1.2305950E+4 1.0301776E+0 |
| 1.2306130E+4 1.0052801E+0 | 1.2306130E+4 1.0439000E+0 | 1.2306130E+4 1.0312722E+0 |
| 1.2306320E+4 1.0103995E+0 | 1.2306320E+4 1.0437000E+0 | 1.2306320E+4 1.0323859E+0 |
| 1.2306500E+4 1.0107785E+0 | 1.2306500E+4 1.0423000E+0 | 1.2306500E+4 1.0328153E+0 |
| 1.2306700E+4 1.0143986E+0 | 1.2306700E+4 1.0426000E+0 | 1.2306700E+4 1.0341857E+0 |
| 1.2306900E+4 1.0136340E+0 | 1.2306900E+4 1.0469000E+0 | 1.2306900E+4 1.0378036E+0 |
| 1.2307100E+4 1.0160297E+0 | 1.2307100E+4 1.0476000E+0 | 1.2307100E+4 1.0397593E+0 |
| 1.2307290E+4 1.0195033E+0 | 1.2307290E+4 1.0492000E+0 | 1.2307290E+4 1.0424433E+0 |
| 1.2307490E+4 1.0161287E+0 | 1.2307490E+4 1.0465000E+0 | 1.2307490E+4 1.0448397E+0 |
| 1.2307660E+4 1.0135896E+0 | 1.2307660E+4 1.0476000E+0 | 1.2307660E+4 1.0453288E+0 |
| 1.2307840E+4 1.0152698E+0 | 1.2307840E+4 1.0475000E+0 | 1.2307840E+4 1.0473610E+0 |
| 1.2308020E+4 1.0176652E+0 | 1.2308020E+4 1.0451000E+0 | 1.2308020E+4 1.0496428E+0 |
| 1.2308230E+4 1.0191618E+0 | 1.2308230E+4 1.0491000E+0 | 1.2308230E+4 1.0501313E+0 |
| 1.2308440E+4 1.0197140E+0 | 1.2308440E+4 1.0490000E+0 | 1.2308440E+4 1.0490397E+0 |
| 1.2308650E+4 1.0210286E+0 | 1.2308650E+4 1.0504000E+0 | 1.2308650E+4 1.0503881E+0 |
| 1.2308860E+4 1.0235720E+0 | 1.2308860E+4 1.0498000E+0 | 1.2308860E+4 1.0512538E+0 |
| 1.2309060E+4 1.0256727E+0 | 1.2309060E+4 1.0505000E+0 | 1.2309060E+4 1.0528205E+0 |
| 1.2309260E+4 1.0287110E+0 | 1.2309260E+4 1.0503000E+0 | 1.2309260E+4 1.0559293E+0 |
| 1.2309450E+4 1.0293281E+0 | 1.2309450E+4 1.0499000E+0 | 1.2309450E+4 1.0571629E+0 |
| 1.2309650E+4 1.0286135E+0 | 1.2309650E+4 1.0515000E+0 | 1.2309650E+4 1.0578461E+0 |
| 1.2309860E+4 1.0302088E+0 | 1.2309860E+4 1.0528000E+0 | 1.2309860E+4 1.0615079E+0 |
| 1.2310070E+4 1.0317318E+0 | 1.2310070E+4 1.0499000E+0 | 1.2310070E+4 1.0619837E+0 |
| 1.2310280E+4 1.0344171E+0 | 1.2310280E+4 1.0557000E+0 | 1.2310280E+4 1.0595765E+0 |
| 1.2310490E+4 1.0314652E+0 | 1.2310490E+4 1.0547000E+0 | 1.2310490E+4 1.0597033E+0 |
| 1.2310700E+4 1.0304488E+0 | 1.2310700E+4 1.0553000E+0 | 1.2310700E+4 1.0639362E+0 |
| 1.2310900E+4 1.0320320E+0 | 1.2310900E+4 1.0544000E+0 | 1.2310900E+4 1.0633870E+0 |
| 1.2311090E+4 1.0346563E+0 | 1.2311090E+4 1.0531000E+0 | 1.2311090E+4 1.0590362E+0 |
| 1.2311280E+4 1.0319219E+0 | 1.2311280E+4 1.0546000E+0 | 1.2311280E+4 1.0577838E+0 |
| 1.2311470E+4 1.0314647E+0 | 1.2311470E+4 1.0538000E+0 | 1.2311470E+4 1.0597503E+0 |
| 1.2311680E+4 1.0367198E+0 | 1.2311680E+4 1.0530000E+0 | 1.2311680E+4 1.0592975E+0 |
| 1.2311890E+4 1.0370532E+0 | 1.2311890E+4 1.0542000E+0 | 1.2311890E+4 1.0618348E+0 |
| 1.2312100E+4 1.0336460E+0 | 1.2312100E+4 1.0571000E+0 | 1.2312100E+4 1.0622280E+0 |
| 1.2312310E+4 1.0345441E+0 | 1.2312310E+4 1.0569000E+0 | 1.2312310E+4 1.0625907E+0 |
| 1.2312500E+4 1.0374552E+0 | 1.2312500E+4 1.0577000E+0 | 1.2312500E+4 1.0637913E+0 |
| 1.2312700E+4 1.0345384E+0 | 1.2312700E+4 1.0575000E+0 | 1.2312700E+4 1.0606686E+0 |
| 1.2312890E+4 1.0360044E+0 | 1.2312890E+4 1.0599000E+0 | 1.2312890E+4 1.0605128E+0 |
| 1.2313080E+4 1.0376798E+0 | 1.2313080E+4 1.0619000E+0 | 1.2313080E+4 1.0601514E+0 |
| 1.2313290E+4 1.0363198E+0 | 1.2313290E+4 1.0595000E+0 | 1.2313290E+4 1.0583923E+0 |
| 1.2313510E+4 1.0352306E+0 | 1.2313510E+4 1.0620000E+0 | 1.2313510E+4 1.0587736E+0 |
| 1.2313720E+4 1.0392402E+0 | 1.2313720E+4 1.0600000E+0 | 1.2313720E+4 1.0576245E+0 |
| 1.2313930E+4 1.0377746E+0 | 1.2313930E+4 1.0592000E+0 | 1.2313930E+4 1.0544853E+0 |
| 1.2314140E+4 1.0304194E+0 | 1.2314140E+4 1.0596000E+0 | 1.2314140E+4 1.0510541E+0 |
| 1.2314340E+4 1.0355101E+0 | 1.2314340E+4 1.0628000E+0 | 1.2314340E+4 1.0559296E+0 |
| 1.2314530E+4 1.0356168E+0 | 1.2314530E+4 1.0640000E+0 | 1.2314530E+4 1.0569551E+0 |
| 1.2314720E+4 1.0360376E+0 | 1.2314720E+4 1.0621000E+0 | 1.2314720E+4 1.0551460E+0 |
| 1.2314910E+4 1.0340659E+0 | 1.2314910E+4 1.0637000E+0 | 1.2314910E+4 1.0533215E+0 |
| 1.2315120E+4 1.0319135E+0 | 1.2315120E+4 1.0627000E+0 | 1.2315120E+4 1.0516279E+0 |



|              |              |              |              |              |              |
|--------------|--------------|--------------|--------------|--------------|--------------|
| 1.2315330E+4 | 1.0364355E+0 | 1.2315330E+4 | 1.0637000E+0 | 1.2315330E+4 | 1.0479358E+0 |
| 1.2315530E+4 | 1.0353062E+0 | 1.2315530E+4 | 1.0644000E+0 | 1.2315530E+4 | 1.0462800E+0 |
| 1.2315720E+4 | 1.0362457E+0 | 1.2315720E+4 | 1.0662000E+0 | 1.2315720E+4 | 1.0486400E+0 |
| 1.2315910E+4 | 1.0258385E+0 | 1.2315910E+4 | 1.0661000E+0 | 1.2315910E+4 | 1.0497430E+0 |
| 1.2316100E+4 | 1.0309178E+0 | 1.2316100E+4 | 1.0678000E+0 | 1.2316100E+4 | 1.0484586E+0 |
| 1.2316270E+4 | 1.0367166E+0 | 1.2316270E+4 | 1.0655000E+0 | 1.2316270E+4 | 1.0480580E+0 |
| 1.2316450E+4 | 1.0316399E+0 | 1.2316450E+4 | 1.0669000E+0 | 1.2316450E+4 | 1.0453868E+0 |
| 1.2316640E+4 | 1.0267591E+0 | 1.2316640E+4 | 1.0675000E+0 | 1.2316640E+4 | 1.0417896E+0 |
| 1.2316840E+4 | 1.0287040E+0 | 1.2316840E+4 | 1.0663000E+0 | 1.2316840E+4 | 1.0433000E+0 |
| 1.2317040E+4 | 1.0296470E+0 | 1.2317040E+4 | 1.0657000E+0 | 1.2317040E+4 | 1.0391000E+0 |
| 1.2317240E+4 | 1.0327427E+0 | 1.2317240E+4 | 1.0668000E+0 | 1.2317240E+4 | 1.0402000E+0 |
| 1.2317430E+4 | 1.0283393E+0 | 1.2317430E+4 | 1.0666000E+0 | 1.2317430E+4 | 1.0390000E+0 |
| 1.2317620E+4 | 1.0269645E+0 | 1.2317620E+4 | 1.0680000E+0 | 1.2317620E+4 | 1.0385991E+0 |
| 1.2317800E+4 | 1.0305548E+0 | 1.2317800E+4 | 1.0721000E+0 | 1.2317800E+4 | 1.0373484E+0 |
| 1.2317990E+4 | 1.0271484E+0 | 1.2317990E+4 | 1.0703000E+0 | 1.2317990E+4 | 1.0316940E+0 |
| 1.2318180E+4 | 1.0258098E+0 | 1.2318180E+4 | 1.0707000E+0 | 1.2318180E+4 | 1.0353000E+0 |
| 1.2318400E+4 | 1.0300160E+0 | 1.2318400E+4 | 1.0704000E+0 | 1.2318400E+4 | 1.0362594E+0 |
| 1.2318620E+4 | 1.0277142E+0 | 1.2318620E+4 | 1.0702000E+0 | 1.2318620E+4 | 1.0301361E+0 |
| 1.2318820E+4 | 1.0294390E+0 | 1.2318820E+4 | 1.0722000E+0 | 1.2318820E+4 | 1.0280109E+0 |
| 1.2319030E+4 | 1.0248214E+0 | 1.2319030E+4 | 1.0699000E+0 | 1.2319030E+4 | 1.0263780E+0 |
| 1.2319220E+4 | 1.0251893E+0 | 1.2319220E+4 | 1.0713000E+0 | 1.2319220E+4 | 1.0222032E+0 |
| 1.2319420E+4 | 1.0192453E+0 | 1.2319420E+4 | 1.0727000E+0 | 1.2319420E+4 | 1.0205284E+0 |
| 1.2319600E+4 | 1.0196177E+0 | 1.2319600E+4 | 1.0724000E+0 | 1.2319600E+4 | 1.0210254E+0 |
| 1.2319780E+4 | 1.0219873E+0 | 1.2319780E+4 | 1.0718000E+0 | 1.2319780E+4 | 1.0202436E+0 |
| 1.2319990E+4 | 1.0261874E+0 | 1.2319990E+4 | 1.0721000E+0 | 1.2319990E+4 | 1.0186878E+0 |
| 1.2320210E+4 | 1.0234041E+0 | 1.2320210E+4 | 1.0757000E+0 | 1.2320210E+4 | 1.0192343E+0 |
| 1.2320420E+4 | 1.0160674E+0 | 1.2320420E+4 | 1.0749000E+0 | 1.2320420E+4 | 1.0187552E+0 |
| 1.2320620E+4 | 1.0226718E+0 | 1.2320620E+4 | 1.0725000E+0 | 1.2320620E+4 | 1.0157203E+0 |
| 1.2320810E+4 | 1.0210727E+0 | 1.2320810E+4 | 1.0742000E+0 | 1.2320810E+4 | 1.0145414E+0 |
| 1.2321000E+4 | 1.0243164E+0 | 1.2321000E+4 | 1.0713000E+0 | 1.2321000E+4 | 1.0115930E+0 |
| 1.2321180E+4 | 1.0211586E+0 | 1.2321180E+4 | 1.0766000E+0 | 1.2321180E+4 | 1.0120521E+0 |
| 1.2321370E+4 | 1.0141302E+0 | 1.2321370E+4 | 1.0746000E+0 | 1.2321370E+4 | 1.0162610E+0 |
| 1.2321580E+4 | 1.0201331E+0 | 1.2321580E+4 | 1.0685000E+0 | 1.2321580E+4 | 1.0140294E+0 |
| 1.2321800E+4 | 1.0237796E+0 | 1.2321800E+4 | 1.0710000E+0 | 1.2321800E+4 | 1.0097506E+0 |
| 1.2322010E+4 | 1.0213206E+0 | 1.2322010E+4 | 1.0740000E+0 | 1.2322010E+4 | 1.0069729E+0 |
| 1.2322220E+4 | 1.0214817E+0 | 1.2322220E+4 | 1.0745000E+0 | 1.2322220E+4 | 1.0059082E+0 |
| 1.2322430E+4 | 1.0162826E+0 | 1.2322430E+4 | 1.0732000E+0 | 1.2322430E+4 | 1.0052401E+0 |
| 1.2322640E+4 | 1.0141501E+0 | 1.2322640E+4 | 1.0724000E+0 | 1.2322640E+4 | 1.0073353E+0 |
| 1.2322850E+4 | 1.0167947E+0 | 1.2322850E+4 | 1.0684000E+0 | 1.2322850E+4 | 1.0080802E+0 |
| 1.2323050E+4 | 1.0155254E+0 | 1.2323050E+4 | 1.0693000E+0 | 1.2323050E+4 | 1.0056330E+0 |
| 1.2323260E+4 | 1.0150550E+0 | 1.2323260E+4 | 1.0716000E+0 | 1.2323260E+4 | 1.0034227E+0 |
| 1.2323490E+4 | 1.0171800E+0 | 1.2323490E+4 | 1.0734000E+0 | 1.2323490E+4 | 1.0010604E+0 |
| 1.2323720E+4 | 1.0172064E+0 | 1.2323720E+4 | 1.0733000E+0 | 1.2323720E+4 | 9.9722777E-1 |
| 1.2323930E+4 | 1.0167103E+0 | 1.2323930E+4 | 1.0668000E+0 | 1.2323930E+4 | 9.9684366E-1 |
| 1.2324150E+4 | 1.0197201E+0 | 1.2324150E+4 | 1.0711000E+0 | 1.2324150E+4 | 9.9528592E-1 |
| 1.2324360E+4 | 1.0169760E+0 | 1.2324360E+4 | 1.0701000E+0 | 1.2324360E+4 | 9.9344316E-1 |
| 1.2324550E+4 | 1.0128114E+0 | 1.2324550E+4 | 1.0728000E+0 | 1.2324550E+4 | 9.9153241E-1 |
| 1.2324750E+4 | 1.0128337E+0 | 1.2324750E+4 | 1.0717000E+0 | 1.2324750E+4 | 9.9317915E-1 |
| 1.2324940E+4 | 1.0133107E+0 | 1.2324940E+4 | 1.0701000E+0 | 1.2324940E+4 | 9.9336503E-1 |
| 1.2325160E+4 | 1.0139942E+0 | 1.2325160E+4 | 1.0712000E+0 | 1.2325160E+4 | 9.9049934E-1 |
| 1.2325370E+4 | 1.0142622E+0 | 1.2325370E+4 | 1.0654000E+0 | 1.2325370E+4 | 9.9059575E-1 |
| 1.2325590E+4 | 1.0115996E+0 | 1.2325590E+4 | 1.0689000E+0 | 1.2325590E+4 | 9.8689000E-1 |

|              |              |              |              |              |              |
|--------------|--------------|--------------|--------------|--------------|--------------|
| 1.2325800E+4 | 1.0128328E+0 | 1.2325800E+4 | 1.0659000E+0 | 1.2325800E+4 | 9.8609654E-1 |
| 1.2326010E+4 | 1.0154684E+0 | 1.2326010E+4 | 1.0666000E+0 | 1.2326010E+4 | 9.8726158E-1 |
| 1.2326210E+4 | 1.0130257E+0 | 1.2326210E+4 | 1.0644000E+0 | 1.2326210E+4 | 9.8938000E-1 |
| 1.2326410E+4 | 1.0133379E+0 | 1.2326410E+4 | 1.0639000E+0 | 1.2326410E+4 | 9.8484000E-1 |
| 1.2326610E+4 | 1.0099446E+0 | 1.2326610E+4 | 1.0647000E+0 | 1.2326610E+4 | 9.8532000E-1 |
| 1.2326820E+4 | 1.0087707E+0 | 1.2326820E+4 | 1.0653000E+0 | 1.2326820E+4 | 9.8331000E-1 |
| 1.2327040E+4 | 1.0127391E+0 | 1.2327040E+4 | 1.0645000E+0 | 1.2327040E+4 | 9.8531627E-1 |
| 1.2327260E+4 | 1.0128011E+0 | 1.2327260E+4 | 1.0656000E+0 | 1.2327260E+4 | 9.8490000E-1 |
| 1.2327480E+4 | 1.0138306E+0 | 1.2327480E+4 | 1.0689000E+0 | 1.2327480E+4 | 9.8351000E-1 |
| 1.2327700E+4 | 1.0124620E+0 | 1.2327700E+4 | 1.0641000E+0 | 1.2327700E+4 | 9.8078692E-1 |
| 1.2327890E+4 | 1.0134712E+0 | 1.2327890E+4 | 1.0613000E+0 | 1.2327890E+4 | 9.7894000E-1 |
| 1.2328080E+4 | 1.0128140E+0 | 1.2328080E+4 | 1.0612000E+0 | 1.2328080E+4 | 9.7748879E-1 |
| 1.2328270E+4 | 1.0078879E+0 | 1.2328270E+4 | 1.0601000E+0 | 1.2328270E+4 | 9.7509950E-1 |
| 1.2328460E+4 | 1.0061435E+0 | 1.2328460E+4 | 1.0615000E+0 | 1.2328460E+4 | 9.7569329E-1 |
| 1.2328670E+4 | 1.0107234E+0 | 1.2328670E+4 | 1.0610000E+0 | 1.2328670E+4 | 9.7748433E-1 |
| 1.2328870E+4 | 1.0121472E+0 | 1.2328870E+4 | 1.0607000E+0 | 1.2328870E+4 | 9.7407536E-1 |
| 1.2329080E+4 | 1.0085582E+0 | 1.2329080E+4 | 1.0582000E+0 | 1.2329080E+4 | 9.7234061E-1 |
| 1.2329280E+4 | 1.0018089E+0 | 1.2329280E+4 | 1.0574000E+0 | 1.2329280E+4 | 9.7219898E-1 |
| 1.2329470E+4 | 1.0064000E+0 | 1.2329470E+4 | 1.0559000E+0 | 1.2329470E+4 | 9.6975120E-1 |
| 1.2329650E+4 | 1.0087796E+0 | 1.2329650E+4 | 1.0526000E+0 | 1.2329650E+4 | 9.6747990E-1 |
| 1.2329830E+4 | 1.0082948E+0 | 1.2329830E+4 | 1.0563000E+0 | 1.2329830E+4 | 9.6706904E-1 |
| 1.2330010E+4 | 1.0064751E+0 | 1.2330010E+4 | 1.0521000E+0 | 1.2330010E+4 | 9.6956497E-1 |
| 1.2330210E+4 | 1.0052444E+0 | 1.2330210E+4 | 1.0572000E+0 | 1.2330210E+4 | 9.7125253E-1 |
| 1.2330410E+4 | 1.0052638E+0 | 1.2330410E+4 | 1.0534000E+0 | 1.2330410E+4 | 9.6967735E-1 |
| 1.2330610E+4 | 1.0044065E+0 | 1.2330610E+4 | 1.0545000E+0 | 1.2330610E+4 | 9.7018997E-1 |
| 1.2330820E+4 | 9.9570524E-1 | 1.2330820E+4 | 1.0517000E+0 | 1.2330820E+4 | 9.6560833E-1 |
| 1.2331010E+4 | 9.9752727E-1 | 1.2331010E+4 | 1.0505000E+0 | 1.2331010E+4 | 9.6216056E-1 |
| 1.2331200E+4 | 1.0073349E+0 | 1.2331200E+4 | 1.0508000E+0 | 1.2331200E+4 | 9.6135637E-1 |
| 1.2331380E+4 | 1.0014592E+0 | 1.2331380E+4 | 1.0458000E+0 | 1.2331380E+4 | 9.6034390E-1 |
| 1.2331560E+4 | 9.9590550E-1 | 1.2331560E+4 | 1.0500000E+0 | 1.2331560E+4 | 9.5712443E-1 |
| 1.2331780E+4 | 9.9919449E-1 | 1.2331780E+4 | 1.0426000E+0 | 1.2331780E+4 | 9.5885690E-1 |
| 1.2331990E+4 | 1.0002085E+0 | 1.2331990E+4 | 1.0453000E+0 | 1.2331990E+4 | 9.5863953E-1 |
| 1.2332200E+4 | 1.0022482E+0 | 1.2332200E+4 | 1.0442000E+0 | 1.2332200E+4 | 9.5590186E-1 |
| 1.2332400E+4 | 9.9699657E-1 | 1.2332400E+4 | 1.0410000E+0 | 1.2332400E+4 | 9.5557247E-1 |
| 1.2332600E+4 | 9.9372103E-1 | 1.2332600E+4 | 1.0447000E+0 | 1.2332600E+4 | 9.5747789E-1 |
| 1.2332800E+4 | 9.9858972E-1 | 1.2332800E+4 | 1.0404000E+0 | 1.2332800E+4 | 9.5323186E-1 |
| 1.2332990E+4 | 9.9831096E-1 | 1.2332990E+4 | 1.0424000E+0 | 1.2332990E+4 | 9.4849428E-1 |
| 1.2333170E+4 | 9.9417951E-1 | 1.2333170E+4 | 1.0409000E+0 | 1.2333170E+4 | 9.5003728E-1 |
| 1.2333360E+4 | 9.9133542E-1 | 1.2333360E+4 | 1.0370000E+0 | 1.2333360E+4 | 9.4753550E-1 |
| 1.2333560E+4 | 9.8836236E-1 | 1.2333560E+4 | 1.0382000E+0 | 1.2333560E+4 | 9.4976401E-1 |
| 1.2333760E+4 | 9.8998153E-1 | 1.2333760E+4 | 1.0372000E+0 | 1.2333760E+4 | 9.5092024E-1 |
| 1.2333970E+4 | 9.8856651E-1 | 1.2333970E+4 | 1.0375000E+0 | 1.2333970E+4 | 9.4734175E-1 |
| 1.2334160E+4 | 9.8460604E-1 | 1.2334160E+4 | 1.0367000E+0 | 1.2334160E+4 | 9.4815120E-1 |
| 1.2334350E+4 | 9.8687633E-1 | 1.2334350E+4 | 1.0342000E+0 | 1.2334350E+4 | 9.4906485E-1 |
| 1.2334530E+4 | 9.8766416E-1 | 1.2334530E+4 | 1.0304000E+0 | 1.2334530E+4 | 9.4693988E-1 |
| 1.2334710E+4 | 9.8817555E-1 | 1.2334710E+4 | 1.0302000E+0 | 1.2334710E+4 | 9.4745151E-1 |
| 1.2334900E+4 | 9.8647784E-1 | 1.2334900E+4 | 1.0261000E+0 | 1.2334900E+4 | 9.4726628E-1 |
| 1.2335110E+4 | 9.7904864E-1 | 1.2335110E+4 | 1.0322000E+0 | 1.2335110E+4 | 9.4499406E-1 |
| 1.2335320E+4 | 9.7851790E-1 | 1.2335320E+4 | 1.0306000E+0 | 1.2335320E+4 | 9.4365705E-1 |
| 1.2335540E+4 | 9.8290314E-1 | 1.2335540E+4 | 1.0266000E+0 | 1.2335540E+4 | 9.4406350E-1 |
| 1.2335750E+4 | 9.8296754E-1 | 1.2335750E+4 | 1.0266000E+0 | 1.2335750E+4 | 9.4084689E-1 |
| 1.2335960E+4 | 9.8222505E-1 | 1.2335960E+4 | 1.0263000E+0 | 1.2335960E+4 | 9.4031000E-1 |

|                           |                           |                           |
|---------------------------|---------------------------|---------------------------|
| 1.2336160E+4 9.8262146E-1 | 1.2336160E+4 1.0267000E+0 | 1.2336160E+4 9.4092316E-1 |
| 1.2336360E+4 9.8300100E-1 | 1.2336360E+4 1.0279000E+0 | 1.2336360E+4 9.3892696E-1 |
| 1.2336560E+4 9.8592803E-1 | 1.2336560E+4 1.0243000E+0 | 1.2336560E+4 9.3967476E-1 |
| 1.2336760E+4 9.8405362E-1 | 1.2336760E+4 1.0236000E+0 | 1.2336760E+4 9.4011352E-1 |
| 1.2336980E+4 9.7823389E-1 | 1.2336980E+4 1.0232000E+0 | 1.2336980E+4 9.3550834E-1 |
| 1.2337200E+4 9.8008646E-1 | 1.2337200E+4 1.0205000E+0 | 1.2337200E+4 9.3893177E-1 |
| 1.2337410E+4 9.7785848E-1 | 1.2337410E+4 1.0211000E+0 | 1.2337410E+4 9.3733495E-1 |
| 1.2337620E+4 9.7806793E-1 | 1.2337620E+4 1.0194000E+0 | 1.2337620E+4 9.3965788E-1 |
| 1.2337810E+4 9.7692340E-1 | 1.2337810E+4 1.0143000E+0 | 1.2337810E+4 9.3529721E-1 |
| 1.2338010E+4 9.7397787E-1 | 1.2338010E+4 1.0154000E+0 | 1.2338010E+4 9.3994579E-1 |
| 1.2338190E+4 9.7303116E-1 | 1.2338190E+4 1.0138000E+0 | 1.2338190E+4 9.3756650E-1 |
| 1.2338390E+4 9.7610944E-1 | 1.2338390E+4 1.0151000E+0 | 1.2338390E+4 9.3702122E-1 |
| 1.2338590E+4 9.7312640E-1 | 1.2338590E+4 1.0167000E+0 | 1.2338590E+4 9.3800623E-1 |
| 1.2338800E+4 9.7291921E-1 | 1.2338800E+4 1.0147000E+0 | 1.2338800E+4 9.3755492E-1 |
| 1.2339010E+4 9.7307316E-1 | 1.2339010E+4 1.0114000E+0 | 1.2339010E+4 9.3394696E-1 |
| 1.2339210E+4 9.7153849E-1 | 1.2339210E+4 1.0141000E+0 | 1.2339210E+4 9.3309048E-1 |
| 1.2339420E+4 9.7395720E-1 | 1.2339420E+4 1.0117000E+0 | 1.2339420E+4 9.3106181E-1 |
| 1.2339620E+4 9.7184939E-1 | 1.2339620E+4 1.0129000E+0 | 1.2339620E+4 9.3572573E-1 |
| 1.2339810E+4 9.6894414E-1 | 1.2339810E+4 1.0104000E+0 | 1.2339810E+4 9.3922547E-1 |
| 1.2340000E+4 9.7306298E-1 | 1.2340000E+4 1.0108000E+0 | 1.2340000E+4 9.3557098E-1 |
| 1.2340210E+4 9.7697689E-1 | 1.2340210E+4 1.0085000E+0 | 1.2340210E+4 9.3844110E-1 |
| 1.2340410E+4 9.7637099E-1 | 1.2340410E+4 1.0069000E+0 | 1.2340410E+4 9.3657223E-1 |
| 1.2340630E+4 9.7369690E-1 | 1.2340630E+4 1.0061000E+0 | 1.2340630E+4 9.3714355E-1 |
| 1.2340840E+4 9.6884136E-1 | 1.2340840E+4 1.0057000E+0 | 1.2340840E+4 9.3975568E-1 |
| 1.2341040E+4 9.6766300E-1 | 1.2341040E+4 1.0051000E+0 | 1.2341040E+4 9.3348701E-1 |
| 1.2341230E+4 9.6848915E-1 | 1.2341230E+4 1.0034000E+0 | 1.2341230E+4 9.3349617E-1 |
| 1.2341420E+4 9.7001455E-1 | 1.2341420E+4 1.0023000E+0 | 1.2341420E+4 9.3629316E-1 |
| 1.2341600E+4 9.6925071E-1 | 1.2341600E+4 9.9830000E-1 | 1.2341600E+4 9.3456015E-1 |
| 1.2341790E+4 9.6577750E-1 | 1.2341790E+4 1.0016000E+0 | 1.2341790E+4 9.3369138E-1 |
| 1.2341980E+4 9.6721969E-1 | 1.2341980E+4 1.0023000E+0 | 1.2341980E+4 9.3783008E-1 |
| 1.2342190E+4 9.6891897E-1 | 1.2342190E+4 1.0014000E+0 | 1.2342190E+4 9.4114975E-1 |
| 1.2342390E+4 9.6739433E-1 | 1.2342390E+4 1.0046000E+0 | 1.2342390E+4 9.3648474E-1 |
| 1.2342580E+4 9.6591232E-1 | 1.2342580E+4 9.9994000E-1 | 1.2342580E+4 9.3578145E-1 |
| 1.2342770E+4 9.6793307E-1 | 1.2342770E+4 1.0006000E+0 | 1.2342770E+4 9.3675000E-1 |
| 1.2342950E+4 9.7048579E-1 | 1.2342950E+4 9.9703000E-1 | 1.2342950E+4 9.3716585E-1 |
| 1.2343130E+4 9.7361430E-1 | 1.2343130E+4 1.0010000E+0 | 1.2343130E+4 9.3671787E-1 |
| 1.2343310E+4 9.7508108E-1 | 1.2343310E+4 9.9693000E-1 | 1.2343310E+4 9.4202586E-1 |
| 1.2343500E+4 9.7191355E-1 | 1.2343500E+4 9.9880000E-1 | 1.2343500E+4 9.4180317E-1 |
| 1.2343690E+4 9.7053433E-1 | 1.2343690E+4 9.9804000E-1 | 1.2343690E+4 9.4130137E-1 |
| 1.2343900E+4 9.6531959E-1 | 1.2343900E+4 1.0003000E+0 | 1.2343900E+4 9.4122427E-1 |
| 1.2344110E+4 9.6713527E-1 | 1.2344110E+4 9.9791000E-1 | 1.2344110E+4 9.4116386E-1 |
| 1.2344310E+4 9.6541697E-1 | 1.2344310E+4 1.0006000E+0 | 1.2344310E+4 9.4116542E-1 |
| 1.2344500E+4 9.6805378E-1 | 1.2344500E+4 9.9797000E-1 | 1.2344500E+4 9.4287414E-1 |
| 1.2344680E+4 9.6710047E-1 | 1.2344680E+4 9.9740000E-1 | 1.2344680E+4 9.4466997E-1 |
| 1.2344860E+4 9.7091989E-1 | 1.2344860E+4 9.9687000E-1 | 1.2344860E+4 9.4253212E-1 |
| 1.2345060E+4 9.7155279E-1 | 1.2345060E+4 9.9977000E-1 | 1.2345060E+4 9.4508776E-1 |
| 1.2345280E+4 9.7251787E-1 | 1.2345280E+4 9.9847000E-1 | 1.2345280E+4 9.4493273E-1 |
| 1.2345500E+4 9.6796112E-1 | 1.2345500E+4 9.9766000E-1 | 1.2345500E+4 9.4487357E-1 |
| 1.2345710E+4 9.6993110E-1 | 1.2345710E+4 9.9765000E-1 | 1.2345710E+4 9.5020121E-1 |
| 1.2345910E+4 9.7389000E-1 | 1.2345910E+4 9.9451000E-1 | 1.2345910E+4 9.5238556E-1 |
| 1.2346110E+4 9.7065001E-1 | 1.2346110E+4 9.9306000E-1 | 1.2346110E+4 9.5189498E-1 |
| 1.2346290E+4 9.7581215E-1 | 1.2346290E+4 9.9574000E-1 | 1.2346290E+4 9.5290719E-1 |

|                           |                           |                           |
|---------------------------|---------------------------|---------------------------|
| 1.2346480E+4 9.7063867E-1 | 1.2346480E+4 9.9269000E-1 | 1.2346480E+4 9.5021231E-1 |
| 1.2346670E+4 9.7116442E-1 | 1.2346670E+4 9.9532000E-1 | 1.2346670E+4 9.5091612E-1 |
| 1.2346870E+4 9.7051394E-1 | 1.2346870E+4 9.9297000E-1 | 1.2346870E+4 9.5734583E-1 |
| 1.2347070E+4 9.7196103E-1 | 1.2347070E+4 9.9396000E-1 | 1.2347070E+4 9.5645109E-1 |
| 1.2347270E+4 9.7350824E-1 | 1.2347270E+4 9.9353000E-1 | 1.2347270E+4 9.5416052E-1 |
| 1.2347460E+4 9.7807567E-1 | 1.2347460E+4 9.9594000E-1 | 1.2347460E+4 9.5415447E-1 |
| 1.2347650E+4 9.7803327E-1 | 1.2347650E+4 9.9620000E-1 | 1.2347650E+4 9.5675466E-1 |
| 1.2347840E+4 9.8323115E-1 | 1.2347840E+4 9.9411000E-1 | 1.2347840E+4 9.5555223E-1 |
| 1.2348020E+4 9.8006668E-1 | 1.2348020E+4 9.9968000E-1 | 1.2348020E+4 9.6499000E-1 |
| 1.2348210E+4 9.7530530E-1 | 1.2348210E+4 9.9547000E-1 | 1.2348210E+4 9.6144017E-1 |
| 1.2348420E+4 9.7968684E-1 | 1.2348420E+4 9.9599000E-1 | 1.2348420E+4 9.5924313E-1 |
| 1.2348630E+4 9.8552138E-1 | 1.2348630E+4 9.9277000E-1 | 1.2348630E+4 9.6299768E-1 |
| 1.2348860E+4 9.8228814E-1 | 1.2348860E+4 9.9262000E-1 | 1.2348860E+4 9.6264118E-1 |
| 1.2349070E+4 9.8254008E-1 | 1.2349070E+4 9.9671000E-1 | 1.2349070E+4 9.6368343E-1 |
| 1.2349280E+4 9.8047151E-1 | 1.2349280E+4 9.9428000E-1 | 1.2349280E+4 9.6809003E-1 |
| 1.2349490E+4 9.8340840E-1 | 1.2349490E+4 9.9606000E-1 | 1.2349490E+4 9.6741195E-1 |
| 1.2349680E+4 9.8254469E-1 | 1.2349680E+4 9.9725000E-1 | 1.2349680E+4 9.6714711E-1 |
| 1.2349890E+4 9.8280529E-1 | 1.2349890E+4 9.9430000E-1 | 1.2349890E+4 9.6856203E-1 |
| 1.2350090E+4 9.8510954E-1 | 1.2350090E+4 9.9379000E-1 | 1.2350090E+4 9.7053083E-1 |
| 1.2350300E+4 9.8684687E-1 | 1.2350300E+4 9.9815000E-1 | 1.2350300E+4 9.7187891E-1 |
| 1.2350530E+4 9.8371963E-1 | 1.2350530E+4 9.9822000E-1 | 1.2350530E+4 9.7487000E-1 |
| 1.2350740E+4 9.8597546E-1 | 1.2350740E+4 9.9636000E-1 | 1.2350740E+4 9.7770725E-1 |
| 1.2350950E+4 9.8700799E-1 | 1.2350950E+4 9.9441000E-1 | 1.2350950E+4 9.7228000E-1 |
| 1.2351160E+4 9.8428214E-1 | 1.2351160E+4 9.9277000E-1 | 1.2351160E+4 9.8030000E-1 |
| 1.2351360E+4 9.8605860E-1 | 1.2351360E+4 9.9586000E-1 | 1.2351360E+4 9.7586000E-1 |
| 1.2351550E+4 9.8935245E-1 | 1.2351550E+4 9.9649000E-1 | 1.2351550E+4 9.8111000E-1 |
| 1.2351740E+4 9.8434586E-1 | 1.2351740E+4 9.9490000E-1 | 1.2351740E+4 9.7861582E-1 |
| 1.2351960E+4 9.8710958E-1 | 1.2351960E+4 9.9899000E-1 | 1.2351960E+4 9.8006822E-1 |
| 1.2352180E+4 9.8871933E-1 | 1.2352180E+4 9.9995000E-1 | 1.2352180E+4 9.7894229E-1 |
| 1.2352400E+4 9.9138496E-1 | 1.2352400E+4 9.9861000E-1 | 1.2352400E+4 9.8148433E-1 |
| 1.2352620E+4 9.8292110E-1 | 1.2352620E+4 9.9935000E-1 | 1.2352620E+4 9.8640931E-1 |
| 1.2352820E+4 9.9620000E-1 | 1.2352820E+4 9.9606000E-1 | 1.2352820E+4 9.7915990E-1 |
| 1.2353030E+4 9.8931352E-1 | 1.2353030E+4 1.0002000E+0 | 1.2353030E+4 9.8458925E-1 |
| 1.2353230E+4 9.9294347E-1 | 1.2353230E+4 9.9987000E-1 | 1.2353230E+4 9.8319000E-1 |
| 1.2353420E+4 9.9982944E-1 | 1.2353420E+4 9.9792000E-1 | 1.2353420E+4 9.8920478E-1 |
| 1.2353620E+4 9.9428754E-1 | 1.2353620E+4 9.9308000E-1 | 1.2353620E+4 9.8737361E-1 |
| 1.2353840E+4 9.9138978E-1 | 1.2353840E+4 9.9746000E-1 | 1.2353840E+4 9.8729442E-1 |
| 1.2354060E+4 1.0005498E+0 | 1.2354060E+4 1.0041000E+0 | 1.2354060E+4 9.9043803E-1 |
| 1.2354290E+4 1.0002770E+0 | 1.2354290E+4 1.0023000E+0 | 1.2354290E+4 9.8736504E-1 |
| 1.2354500E+4 9.9915768E-1 | 1.2354500E+4 1.0001000E+0 | 1.2354500E+4 9.9447582E-1 |
| 1.2354690E+4 9.9310406E-1 | 1.2354690E+4 1.0033000E+0 | 1.2354690E+4 9.9242647E-1 |
| 1.2354890E+4 9.9431248E-1 | 1.2354890E+4 1.0019000E+0 | 1.2354890E+4 9.8785946E-1 |
| 1.2355070E+4 9.9391373E-1 | 1.2355070E+4 1.0001000E+0 | 1.2355070E+4 9.9035980E-1 |
| 1.2355270E+4 9.9841193E-1 | 1.2355270E+4 9.9911000E-1 | 1.2355270E+4 9.9711205E-1 |
| 1.2355470E+4 1.0026877E+0 | 1.2355470E+4 9.9935000E-1 | 1.2355470E+4 9.9803689E-1 |
| 1.2355680E+4 1.0030919E+0 | 1.2355680E+4 1.0027000E+0 | 1.2355680E+4 9.9343688E-1 |
| 1.2355890E+4 1.0019789E+0 | 1.2355890E+4 1.0010000E+0 | 1.2355890E+4 9.9688746E-1 |
| 1.2356080E+4 1.0021151E+0 | 1.2356080E+4 1.0041000E+0 | 1.2356080E+4 9.9568639E-1 |
| 1.2356280E+4 9.9663589E-1 | 1.2356280E+4 1.0008000E+0 | 1.2356280E+4 9.9550696E-1 |
| 1.2356470E+4 9.9653085E-1 | 1.2356470E+4 9.9979000E-1 | 1.2356470E+4 9.9883983E-1 |
| 1.2356660E+4 1.0005198E+0 | 1.2356660E+4 1.0049000E+0 | 1.2356660E+4 9.9642782E-1 |
| 1.2356850E+4 1.0011126E+0 | 1.2356850E+4 1.0030000E+0 | 1.2356850E+4 9.9704429E-1 |

|              |              |              |              |              |              |
|--------------|--------------|--------------|--------------|--------------|--------------|
| 1.2357040E+4 | 1.0013385E+0 | 1.2357040E+4 | 1.0036000E+0 | 1.2357040E+4 | 1.0004405E+0 |
| 1.2357250E+4 | 1.0052023E+0 | 1.2357250E+4 | 1.0022000E+0 | 1.2357250E+4 | 9.9639253E-1 |
| 1.2357470E+4 | 1.0067368E+0 | 1.2357470E+4 | 1.0088000E+0 | 1.2357470E+4 | 9.9847499E-1 |
| 1.2357690E+4 | 1.0059824E+0 | 1.2357690E+4 | 9.9991000E-1 | 1.2357690E+4 | 1.0025778E+0 |
| 1.2357900E+4 | 1.0052340E+0 | 1.2357900E+4 | 1.0056000E+0 | 1.2357900E+4 | 1.0031839E+0 |
| 1.2358100E+4 | 1.0009322E+0 | 1.2358100E+4 | 1.0013000E+0 | 1.2358100E+4 | 9.9602643E-1 |
| 1.2358280E+4 | 1.0019618E+0 | 1.2358280E+4 | 1.0024000E+0 | 1.2358280E+4 | 9.9904170E-1 |
| 1.2358390E+4 | 1.0053000E+0 | 1.2358390E+4 | 1.0049000E+0 | 1.2358390E+4 | 1.0055058E+0 |
| 1.2358420E+4 | 1.0062868E+0 | 1.2358420E+4 | 1.0036000E+0 | 1.2358420E+4 | 1.0069877E+0 |
| 1.2358440E+4 | 1.0069265E+0 | 1.2358440E+4 | 1.0020000E+0 | 1.2358440E+4 | 1.0078017E+0 |

## 5. Optimized Cartesian coordinates

### CysSerGlyCysLys

|   |                   |                   |                   |
|---|-------------------|-------------------|-------------------|
| S | -0.34157337381242 | -0.76003187338060 | 3.57994755253456  |
| S | -3.01352745840693 | 0.24460605856372  | 6.72659753983417  |
| O | -1.63354595384508 | 4.68795957178038  | 2.68001058926802  |
| O | -1.45558383212022 | 0.45689419977587  | -0.35690064141965 |
| O | -3.76669102208535 | -0.50481595170180 | 3.76003494799486  |
| O | 1.46507533348402  | 4.63626859184317  | 4.07883085103340  |
| O | -3.18710464626939 | 2.41908729081182  | 3.86096488282802  |
| O | -3.00367615552067 | -5.19306068573532 | 3.73495800246666  |
| N | -3.61381982896932 | -2.66869666532016 | 3.08744084649658  |
| N | -2.42360943339087 | 0.45814657749549  | 1.69832748577436  |
| N | -1.75787565252392 | 3.39427235270269  | 5.33398309940224  |
| N | -5.19582040806730 | 3.53712065789638  | 5.70797689216658  |
| N | -0.75597360183960 | 2.65175394515542  | 2.16952522998632  |
| N | -8.63658302182973 | -0.11191462704052 | 3.86179233667660  |
| N | -3.64164967044684 | -4.88520831373181 | 5.89127914700474  |
| C | -0.60609866521299 | 3.42450216728867  | 4.45460005366135  |
| C | -2.43488990649009 | -0.98164956636849 | 1.81584767111378  |
| C | -1.78314703381459 | 1.05291134064029  | 0.67244580342031  |
| C | -1.01809453351152 | -1.51848854891819 | 2.06198243867951  |
| C | -3.34882035557608 | -1.35458457310343 | 2.97691048244739  |
| C | -4.26684225250485 | -3.21972150618944 | 4.25393165654316  |
| C | -1.06371993749884 | 3.65370178150595  | 3.01635278000668  |
| C | 0.30223712055578  | 4.56858121066608  | 4.88728523077931  |
| C | -2.93648907133654 | 2.83770666665165  | 4.99379751738527  |
| C | -3.56299128181023 | -4.52095933863969 | 4.60503585556027  |
| C | -3.99915899175350 | 2.78405675043982  | 6.08182754126442  |
| C | -4.39718839447278 | 1.32787806143745  | 6.27960324652599  |
| C | -1.43023714310760 | 2.51530653689614  | 0.89092023311449  |
| C | -5.75326318459425 | -3.50444719593526 | 3.99523555661549  |
| C | -6.54930744777361 | -2.24596988436389 | 3.66549228721479  |
| C | -6.74761496831400 | -1.33262231826429 | 4.86914018283315  |
| C | -7.32065458213151 | 0.02560641268356  | 4.49854389998043  |
| H | -2.67419934343945 | 0.99411405332260  | 2.53307397841841  |
| H | -2.80794600923194 | -1.43193120090833 | 0.89106658412467  |
| H | -3.20534081595053 | -3.33577403719382 | 2.44311524288358  |
| H | -0.38601082747737 | 1.80206280054391  | 2.58371631580289  |
| H | 0.55766003040002  | 4.45043320737536  | 5.94540233444099  |
| H | -0.05549674466528 | 2.47752242414037  | 4.52466608289763  |
| H | -0.38587383962612 | -1.25325756218247 | 1.21527766976984  |

|   |                   |                   |                  |
|---|-------------------|-------------------|------------------|
| H | -3.61038155673984 | 3.19682212070656  | 7.01742386241379 |
| H | -1.61358887065169 | 3.64321130744197  | 6.30410093400468 |
| H | -4.15169835968338 | -2.49565683532327 | 5.06527266455760 |
| H | -1.03671220747382 | -2.60421683376974 | 2.16523073167068 |
| H | -5.48659269229382 | 3.23124999091616  | 4.78032674848858 |
| H | -5.18884088268514 | 1.25897004554709  | 7.02638492391173 |
| H | -4.75951878541307 | 0.93046101894870  | 5.33036797001537 |
| H | -9.01491246124628 | 0.81448858387905  | 3.68022177460375 |
| H | -9.27561778550600 | -0.53634152008228 | 4.53081499675193 |
| H | -7.35213058713340 | 0.65920877763908  | 5.39478984462986 |
| H | -6.64603355380169 | 0.50985864493358  | 3.78459074305613 |
| H | -5.79169083097520 | -1.16600366329607 | 5.37295861857332 |
| H | -7.41012751187101 | -1.82198068095249 | 5.59448103856569 |
| H | -6.04228736585390 | -1.69311961043449 | 2.86722961083392 |
| H | -7.52284619169126 | -2.53988176191667 | 3.26682281673460 |
| H | -5.81184821673487 | -4.21997621271657 | 3.16797034561234 |
| H | -6.17840199500167 | -3.99371691585686 | 4.87856861487783 |
| H | 2.04675533720517  | 3.90506961545800  | 4.33109258006911 |
| H | -0.23357132617423 | 5.50943048876997  | 4.75652496389112 |
| H | -0.80612235799352 | 2.83555456476572  | 0.05604281803661 |
| H | -2.33284355199281 | 3.13260263344514  | 0.91226199748626 |
| H | -4.09539700507763 | -4.30427382251481 | 6.57835699797370 |
| H | -3.26590547616746 | -5.77553699145957 | 6.18532059647147 |
| H | -4.96202975837387 | 4.52389275829961  | 5.61642820343413 |
| H | -2.85638682616546 | 0.71556588684149  | 7.97325317881372 |
| H | 0.92357072447738  | -1.14889039990852 | 3.37144901699077 |

### Hg(CysSerGlyCysLys)

|    |                   |                   |                   |
|----|-------------------|-------------------|-------------------|
| Hg | -1.36350307996235 | 0.04725582175852  | 5.53429718831469  |
| S  | 0.11506807319511  | -0.34703600804549 | 3.79309418088947  |
| S  | -2.54602997391056 | 0.59119016257166  | 7.44399952511969  |
| O  | -2.31409951002811 | 4.42173512275006  | 2.45559525325353  |
| O  | -1.26520565879811 | 0.01506084814782  | -0.07852129542817 |
| O  | -3.40453382533704 | -0.95739321400266 | 4.24717678372658  |
| O  | 0.86068101229851  | 5.26017117800557  | 3.47165186539054  |
| O  | -3.08463313448987 | 2.02854182443431  | 4.14827081644182  |
| O  | -3.75716654885241 | -5.56107108819941 | 3.08010513548529  |
| N  | -3.67629129506993 | -2.86925151560342 | 3.05446986357719  |
| N  | -2.28291476382536 | 0.18187589495045  | 1.94623880600931  |
| N  | -1.91284927318091 | 3.62955744686466  | 5.24277890110222  |
| N  | -5.24305397667175 | 3.22235965824646  | 5.84356952035004  |
| N  | -0.93400813779498 | 2.64465401488384  | 2.09663207591342  |
| N  | -8.21276719697277 | 0.47547856882056  | 3.87661113178812  |
| N  | -4.46668032544731 | -5.57233276741286 | 5.23747007959799  |
| C  | -0.86368156509011 | 3.73578765811957  | 4.24888006469323  |
| C  | -2.12706962985180 | -1.22516261624206 | 2.22695253070241  |
| C  | -1.68668462785313 | 0.70451806407682  | 0.85163205227448  |
| C  | -0.70055522514856 | -1.57496710101149 | 2.71552171943569  |
| C  | -3.14097354835193 | -1.66050366748683 | 3.26086338450639  |
| C  | -4.57462838168151 | -3.50236038543276 | 3.99457819014758  |
| C  | -1.46035559511857 | 3.63041575630959  | 2.84717825152493  |
| C  | -0.18732655003498 | 5.09334260250728  | 4.40932745151940  |

|   |                   |                   |                   |
|---|-------------------|-------------------|-------------------|
| C | -2.93203589254795 | 2.76475518887220  | 5.13356463512723  |
| C | -4.20925006256113 | -4.97627961545639 | 4.06712664703935  |
| C | -3.93391218907711 | 2.72898600209761  | 6.27319017160942  |
| C | -4.08089076490809 | 1.28545009811974  | 6.73706042611451  |
| C | -1.53897053477159 | 2.21755449045145  | 0.85127854007629  |
| C | -6.03541964595135 | -3.37866650120295 | 3.53640394673846  |
| C | -6.50558261588495 | -1.93427084269757 | 3.41000639326257  |
| C | -6.65950780103167 | -1.22824581033012 | 4.75066788363228  |
| C | -6.95756271588378 | 0.25473095568117  | 4.60463455805730  |
| H | -2.51524986174639 | 0.79832904043313  | 2.72635803077882  |
| H | -2.28803873651974 | -1.78113698627960 | 1.29999391855035  |
| H | -3.42954622440561 | -3.40082498459950 | 2.22746004597478  |
| H | -0.32458731467517 | 1.97906753829742  | 2.56257683398722  |
| H | 0.17330673150100  | 5.19880556259472  | 5.43760185673553  |
| H | -0.12049409837208 | 2.94226622892223  | 4.40079325565429  |
| H | -0.04426057585701 | -1.63058438566508 | 1.84383959555195  |
| H | -3.58637485313883 | 3.34791177831463  | 7.10496788377124  |
| H | -1.82265036936645 | 4.16307542314975  | 6.09870027567448  |
| H | -4.43054064627004 | -3.02055192987903 | 4.96359603171111  |
| H | -0.70553419681057 | -2.55602885114149 | 3.19558906093298  |
| H | -5.51415051137272 | 2.72830276048247  | 4.99536934358311  |
| H | -4.82535893817405 | 1.24642201224573  | 7.53555628044798  |
| H | -4.41379344090048 | 0.66060525630167  | 5.90650222070707  |
| H | -8.40872835635519 | 1.47297697037762  | 3.84500420503094  |
| H | -8.97430397329474 | 0.06952440091677  | 4.41647688613116  |
| H | -6.96119216676674 | 0.71926593068914  | 5.59902185323484  |
| H | -6.14611422927439 | 0.71730149376074  | 4.03148512263941  |
| H | -5.74004420071348 | -1.32754459660909 | 5.33425409939963  |
| H | -7.46119046708390 | -1.70630693788763 | 5.32766627373404  |
| H | -5.80362381830323 | -1.37393545137956 | 2.78172382064087  |
| H | -7.46204542465500 | -1.92412969363933 | 2.88275410300797  |
| H | -6.12101503766458 | -3.89005204982750 | 2.57159121432999  |
| H | -6.66982107628927 | -3.91881807604226 | 4.24748224427269  |
| H | 1.61085122100083  | 4.72184100365796  | 3.76184276002720  |
| H | -0.92267930308497 | 5.87443720797092  | 4.21123129688883  |
| H | -0.93468959539605 | 2.49167146489561  | -0.01415927229744 |
| H | -2.51685956447246 | 2.69804323347949  | 0.76501279129618  |
| H | -4.80647573136032 | -5.05213451177902 | 6.03094982241534  |
| H | -4.32108736373368 | -6.56697666008227 | 5.33708132963334  |
| H | -5.16877991584858 | 4.20514758377599  | 5.58722513756086  |

**[Hg(PC2)]<sup>-2</sup>**

|    |                   |                   |                  |
|----|-------------------|-------------------|------------------|
| Hg | -2.54973949755173 | 0.29785811772234  | 6.58831176265402 |
| S  | -0.52912023697255 | -0.82656100784523 | 6.69666697002173 |
| S  | -4.39148313292006 | 1.61852518833407  | 7.06704003332646 |
| O  | 1.49224052527581  | -0.67988369053712 | 3.74598250906823 |
| O  | -3.32192004203707 | -1.11390088744993 | 4.48256270432593 |
| O  | -2.51927956562524 | 4.53548554436716  | 1.93094811396859 |
| O  | -0.50583051961776 | 4.79678792385199  | 0.96924300985446 |
| O  | -2.57951056660225 | 1.78196569435313  | 4.03752782662809 |
| O  | -5.66893261139761 | -5.29578482138611 | 2.61447099415858 |
| O  | -3.43950330233348 | -5.39596153884081 | 2.29005173894923 |

|   |                   |                   |                   |
|---|-------------------|-------------------|-------------------|
| O | -5.21960748613979 | 5.91136081759845  | 5.67103110624623  |
| O | -6.52394390318605 | 8.67824078398019  | 1.09145035459072  |
| O | -4.29525349374361 | 9.05366745889031  | 1.10522747660159  |
| N | -2.97486849950492 | -3.08503340302986 | 3.42367848425913  |
| N | -0.75630157028031 | -0.39889240008721 | 3.67848381195387  |
| N | -1.40568636726468 | 3.73282182405624  | 4.27852371595599  |
| N | -4.09356336712577 | 4.56059240958462  | 4.22927411854579  |
| N | -3.63095263560256 | 6.61870667494080  | 0.54763452714381  |
| C | -1.05145943416468 | -1.76436427607851 | 4.03474680351164  |
| C | 0.51154661148246  | 0.07046117242600  | 3.71945502230550  |
| C | 0.62284807687742  | 1.57678827397116  | 3.77833096871858  |
| C | -0.55620334149658 | 3.71995767895267  | 3.08758275741601  |
| C | -0.56293184896410 | -2.15596635793900 | 5.45267319638887  |
| C | -2.55331903760909 | -1.95516356559224 | 3.98074281769021  |
| C | -4.36427507185936 | -3.48322724194139 | 3.38294554399520  |
| C | -0.10294944242966 | 2.32451767425537  | 2.65541242165255  |
| C | -1.24752403675815 | 4.41949143111271  | 1.89248339953445  |
| C | -2.46513397817608 | 2.92707249577542  | 4.48300832344195  |
| C | -4.49824933638294 | -4.85220371407219 | 2.69869459001690  |
| C | -3.63487945500249 | 3.59244351175681  | 5.21424142508836  |
| C | -4.72308255919804 | 2.58916560136752  | 5.55966421574984  |
| C | -4.76288441669084 | 5.68692156939751  | 4.54622650131043  |
| C | -4.85654250267124 | 6.66294541540910  | 3.38943145866780  |
| C | -5.07851547031405 | 6.81674731606363  | 0.85415494815231  |
| C | -5.32523582584447 | 8.33173908951672  | 1.02095130305440  |
| C | -5.47500546035681 | 6.06458602441115  | 2.11893888762770  |
| H | -1.50561602567082 | 0.28334523822499  | 3.79433419629236  |
| H | 0.56913521416595  | 2.46028094547710  | 1.80567470892558  |
| H | -0.96482070928497 | 1.76278196603427  | 2.29897440895835  |
| H | -0.56528989054404 | -2.44609252392842 | 3.33094761849135  |
| H | -2.33263111601969 | -3.74381768712804 | 2.99480289730187  |
| H | 0.19992842308937  | 1.86998747745661  | 4.74582471381049  |
| H | 0.32728503365684  | 4.31322255611533  | 3.33801091274772  |
| H | 1.68251649085147  | 1.83506264718803  | 3.79217254438142  |
| H | 0.47847899396929  | -2.47540935267711 | 5.38992697412036  |
| H | -3.30063921890924 | 4.11350962279626  | 6.11940325039577  |
| H | -1.49547777926368 | 4.65123865657686  | 4.69855637010479  |
| H | -4.95837104638284 | -2.74942665956844 | 2.83263422474901  |
| H | -4.77428570587839 | -3.54552235309883 | 4.39400338946198  |
| H | -1.15634300042453 | -2.99876180284825 | 5.81391825315444  |
| H | -3.60287708004904 | 4.54087634971120  | 3.32471126110731  |
| H | -5.63908934216042 | 3.14008847117782  | 5.78367353330707  |
| H | -4.90030535758797 | 1.92839149147119  | 4.71105190186293  |
| H | -3.83348250984287 | 7.00367185785306  | 3.19134506195637  |
| H | -5.42761733988851 | 7.53090614299076  | 3.71970414257398  |
| H | -5.19595945703669 | 5.01574134345323  | 1.99798736730561  |
| H | -6.56333629697083 | 6.09681073532739  | 2.19498222751090  |
| H | -5.65683293865047 | 6.44430866322643  | 0.00955930857044  |
| H | -3.48595735416124 | 6.50554734448207  | -0.45542753770425 |
| H | -3.18013519086417 | 7.50814089141127  | 0.81775190233255  |
| H | -3.18285699395420 | 5.79442319097976  | 1.03392452570643  |



**[Hg<sub>3</sub>(SMe)<sub>9</sub>]<sup>-3-β</sup>**

|    |                   |                   |                   |
|----|-------------------|-------------------|-------------------|
| Hg | -2.27076471606678 | 1.46492430844317  | -0.40639654853980 |
| Hg | -2.60700025410234 | -2.17157725613512 | -1.68940272266850 |
| Hg | -2.77548910686926 | 0.75133156907018  | -4.00747099198925 |
| S  | 0.03046037026807  | 0.67729553041501  | -0.03278811584684 |
| S  | -2.33290230288620 | 2.86246025297513  | -2.54100275003822 |
| S  | -3.96466820414657 | -0.42707535607536 | -0.42233472854507 |
| S  | -3.07297029469184 | 3.03058150301236  | 1.39516237654693  |
| S  | -3.99307224686016 | -3.55218111049569 | -3.20504832613198 |
| S  | -1.21647015356539 | -3.45313746755834 | -0.09927780875239 |
| S  | -1.00849356761074 | -0.86978241951699 | -3.25079529545371 |
| S  | -1.96204752387824 | 1.53802435063076  | -6.25714304881772 |
| S  | -5.15977550621620 | 0.26289298736997  | -3.86779272491766 |
| C  | 0.67148670829717  | 2.22239590944598  | 0.71061403657675  |
| C  | -2.27220788169437 | 4.56992775766662  | 0.81981711277806  |
| C  | -2.53180442308095 | 3.27320783956417  | -6.21582834741479 |
| C  | -5.73619279686431 | 1.56754236922663  | -5.01670924464760 |
| C  | -1.07225415244773 | -1.95856717546307 | -4.71708859729636 |
| C  | 0.42396719328246  | -3.13901532973084 | -0.83868064117846 |
| C  | -2.88732216232118 | -5.00566599706437 | -3.30962360385357 |
| C  | -0.54523593850291 | 3.01652587130674  | -2.87116007646741 |
| C  | -3.62679843881803 | -0.98086699939779 | 1.28752673329987  |
| H  | 1.68160845268391  | 2.04846277604065  | 1.08799072924783  |
| H  | 0.70992386478038  | 3.02448417933379  | -0.02942192657440 |
| H  | 0.03667323138615  | 2.54738355015313  | 1.53662860190202  |
| H  | -2.75264032708214 | 5.43013872784607  | 1.28990421480964  |
| H  | -1.21218519513932 | 4.57885747355837  | 1.07755392554431  |
| H  | -2.36399892467631 | 4.65964804890140  | -0.26433929056875 |
| H  | -2.03324004127528 | 3.83793693844594  | -7.00613108694404 |
| H  | -3.61012019967900 | 3.33668170458002  | -6.36893031223870 |
| H  | -2.29771110959904 | 3.73003452573241  | -5.25254245383106 |
| H  | -5.24008689701120 | 1.47817308394814  | -5.98437763162879 |
| H  | -6.81377021888165 | 1.46557900729979  | -5.16152245213909 |
| H  | -5.53055083055063 | 2.56127353231328  | -4.61543247267293 |
| H  | -0.31961036609731 | -2.74304464658047 | -4.61274615200707 |
| H  | -2.06035440018064 | -2.41556852647535 | -4.79901351255891 |
| H  | -0.85764439841833 | -1.37439324835809 | -5.61397746868989 |
| H  | 0.63459376030093  | -2.06947040442052 | -0.84103240102314 |
| H  | 1.18330614542609  | -3.65593524851509 | -0.24762081309922 |
| H  | 0.46738070106063  | -3.50567648446508 | -1.86533268160324 |
| H  | -3.43153500689019 | -5.84784396165549 | -3.74149801450648 |
| H  | -2.02575280736756 | -4.78637590278241 | -3.94373991280831 |
| H  | -2.52028821065118 | -5.28506496436283 | -2.32130463686686 |
| H  | -0.16498638969794 | 3.93717982898423  | -2.42410945085395 |
| H  | -0.02142767289972 | 2.16010742789948  | -2.44089474209122 |
| H  | -0.38113680305265 | 3.03822232363786  | -3.95047704235275 |
| H  | -2.57483935728852 | -1.24616527853597 | 1.39206954019965  |
| H  | -3.87952249905053 | -0.17729302766775 | 1.98143491554929  |
| H  | -4.23948738137343 | -1.85549251254460 | 1.51308083116370  |

**[Hg<sub>4</sub>(SMe)<sub>11</sub>]<sup>-3-α</sup>**

|    |                   |                   |                   |
|----|-------------------|-------------------|-------------------|
| Hg | -1.93466988232515 | 0.53967650243005  | -0.19815103427565 |
| Hg | -1.53885459171021 | 1.77617421170769  | -3.79131206387340 |
| Hg | -0.40715132113684 | -2.18144965496310 | -2.77456397512833 |
| Hg | -3.50624510479497 | -3.50089137671789 | -0.27250156168152 |
| S  | 0.31988871867107  | 2.74882261281709  | -2.56044383447339 |
| S  | 0.13654950477432  | -0.72667572652281 | -0.72418567024094 |
| S  | -1.86391304903162 | 2.54052047025228  | 1.22539875101162  |
| S  | -0.55486580748830 | -0.49740844514592 | -4.64282568375297 |
| S  | -2.75711413054068 | 2.63052269455416  | -5.74402382451248 |
| S  | -3.45621406927808 | 1.16486569849202  | -2.12476540105201 |
| S  | -2.47402476348554 | -3.55792388366665 | -2.64810637392728 |
| S  | 1.61402467231458  | -3.59740061169663 | -2.88936021856328 |
| S  | -2.27227403091114 | -5.18489234341913 | 1.03932526673407  |
| S  | -3.38301178199874 | -1.28546616597856 | 0.97833123060039  |
| S  | -5.92220889181345 | -3.90732926448893 | -0.59801240429934 |
| C  | 1.68061892772504  | 1.65752321230669  | -3.10547924566395 |
| C  | 0.11144445972144  | -2.07557714935415 | 0.50514616768862  |
| C  | -2.31712633923522 | 3.78487170694632  | -0.03289478173400 |
| C  | -1.88343568292757 | -1.12929115601026 | -5.72063231770377 |
| C  | -4.36692114447771 | 1.79002910732381  | -5.56460164253025 |
| C  | -3.98985171199191 | -0.47286201603059 | -2.71377910186599 |
| C  | -1.70006993999469 | -5.20960110420247 | -2.57394783616293 |
| C  | 2.83910839403793  | -2.24009604400955 | -2.91921084500674 |
| C  | -3.21210688190210 | -6.67718145384254 | 0.55805157843251  |
| C  | -5.04420988119321 | -0.56404695645948 | 0.73406883237164  |
| C  | -6.37547219211320 | -4.08263297135741 | 1.16412371737508  |
| H  | 2.60302966859786  | 1.99987026774543  | -2.63129810570640 |
| H  | 1.49154552030723  | 0.62941410131999  | -2.79771529526078 |
| H  | 1.80680232777195  | 1.68743945049142  | -4.18794083199481 |
| H  | 0.29753212351109  | -1.66833118240498 | 1.50010501915913  |
| H  | -0.84660268581483 | -2.59475779692381 | 0.49561934710607  |
| H  | 0.89625212235770  | -2.78722470924768 | 0.24265616781948  |
| H  | -2.35809013861139 | 4.76852810809102  | 0.43912072744687  |
| H  | -1.57589698613496 | 3.80218588373655  | -0.83284890073604 |
| H  | -3.29364943770712 | 3.55861144950591  | -0.46329349662708 |
| H  | -1.49929617671902 | -1.94695375569078 | -6.33193161226865 |
| H  | -2.72940667378602 | -1.49124046455629 | -5.13729284388396 |
| H  | -2.21083850017390 | -0.31368695996150 | -6.36808004414463 |
| H  | -5.06984219497165 | 2.22109536938415  | -6.27978767274382 |
| H  | -4.27540426027067 | 0.72180368164302  | -5.76370210420077 |
| H  | -4.75786567076522 | 1.92480461026065  | -4.55529670138004 |
| H  | -3.13054669382037 | -1.03950394909504 | -3.06631020014784 |
| H  | -4.46485968569882 | -1.02497097251534 | -1.90089819889461 |
| H  | -4.70076934710799 | -0.34688137407672 | -3.53270823026077 |
| H  | -2.47752864374935 | -5.96551178533817 | -2.69624700437910 |
| H  | -0.97203919597323 | -5.30724922690956 | -3.37969847486828 |
| H  | -1.21112789638241 | -5.34632500165400 | -1.60877663323365 |
| H  | 2.74913774077254  | -1.62555234235300 | -2.02202431177974 |
| H  | 3.8442583777369   | -2.66390014500710 | -2.96028133134661 |
| H  | 2.69066287921055  | -1.60127474721068 | -3.79147235563666 |
| H  | -4.28586347081544 | -6.50692694303872 | 0.64178896574579  |
| H  | -2.98739921971962 | -6.95998689235672 | -0.47147430616002 |

|   |                   |                   |                  |
|---|-------------------|-------------------|------------------|
| H | -2.93280702948057 | -7.50330119640378 | 1.21464849828224 |
| H | -4.98778207885476 | 0.28158447490792  | 0.04606028953535 |
| H | -5.70817072047070 | -1.32469677167788 | 0.31768442416539 |
| H | -5.43475854563724 | -0.22084492846178 | 1.69309219039673 |
| H | -6.15633207891479 | -3.16478868848858 | 1.71317281291755 |
| H | -7.44420466712045 | -4.29007318940110 | 1.24380808570932 |
| H | -5.82388609549608 | -4.90099451327686 | 1.62910827260467 |

**[Hg<sub>4</sub>(SMe)<sub>12</sub>]<sup>4-</sup>- $\alpha$**

|    |                   |                   |                   |
|----|-------------------|-------------------|-------------------|
| Hg | -2.36427047969126 | 1.14481482895138  | 0.43161471250104  |
| Hg | -2.07749050523275 | -2.64072992770718 | -1.55003653135851 |
| Hg | -2.17300893411990 | 0.50310231680434  | -4.05917728145523 |
| Hg | -4.79505724627367 | -3.94646400680246 | 0.25631900356187  |
| S  | -0.44473333523873 | 2.52981022562863  | 1.37474482238020  |
| S  | -2.55462041662651 | 2.03351643112303  | -2.06959278752110 |
| S  | -1.06796805613946 | -0.94709020770156 | 0.09037773746995  |
| S  | -4.54067515582906 | 1.75929978187045  | 1.31234661154778  |
| S  | -4.46269870938813 | -2.55820785231868 | -2.02673971085401 |
| S  | -0.76610315626665 | -4.67057503902565 | -1.17684699717545 |
| S  | -0.92924775775312 | -1.66404873168524 | -3.74801328062706 |
| S  | -4.05320442441642 | -6.19754778467512 | -0.42012767913072 |
| S  | -3.69592792519385 | -2.48370395923335 | 1.88426034001537  |
| S  | -7.29532116177677 | -3.89825493846874 | 0.51437881431992  |
| S  | -0.83844074422517 | 1.98165942762413  | -5.60444477979602 |
| S  | -4.37714255470984 | 0.05822449725225  | -5.12482581236149 |
| C  | -1.29633528266833 | 4.12397425777240  | 1.63757231483916  |
| C  | -4.72597073057372 | 3.42103447700347  | 0.57440349734976  |
| C  | -2.06533323507822 | 3.32881949828805  | -5.72183433741504 |
| C  | -3.83422612986284 | 0.00972797435737  | -6.86946966385160 |
| C  | -1.91744536403607 | -2.70627713206599 | -4.87564488995434 |
| C  | 0.89200213706218  | -3.90202585786707 | -1.15415076897577 |
| C  | -5.59265285279471 | -7.15951379730731 | -0.17744584944991 |
| C  | -7.41961753916116 | -4.81572162686856 | 2.08980899267807  |
| C  | -5.13967255853513 | -1.55303387551442 | 2.50667996546211  |
| C  | -1.17960141158922 | 3.22939855445611  | -2.16855171597529 |
| C  | 0.25293571067791  | -0.20293238376607 | -0.92596116639721 |
| C  | -4.88783806727207 | -0.89422244920933 | -1.42155338524466 |
| H  | -0.61797104953124 | 4.83188276480386  | 2.11831979693038  |
| H  | -1.62065975705702 | 4.54638258180627  | 0.68446237977435  |
| H  | -2.17279776942874 | 3.99489263423175  | 2.27392387668144  |
| H  | -5.77872024966582 | 3.70543764698863  | 0.62984159442094  |
| H  | -4.13433575220830 | 4.16621748516280  | 1.10538519042402  |
| H  | -4.41378101012016 | 3.40433987691800  | -0.47094553024279 |
| H  | -1.70947447759935 | 4.09898666999082  | -6.40936310342690 |
| H  | -3.02129052179361 | 2.94585142186313  | -6.08438717490713 |
| H  | -2.23185175791343 | 3.78210908821924  | -4.74228830570315 |
| H  | -3.31103674824236 | -0.92470393689672 | -7.08343586424619 |
| H  | -4.70504795036234 | 0.07746915575050  | -7.52505064271511 |
| H  | -3.15610410193989 | 0.83562364854430  | -7.08841140104540 |
| H  | -1.74428451664017 | -3.75598545338566 | -4.63003474801746 |
| H  | -2.97597818373255 | -2.46866354473001 | -4.75693601282610 |
| H  | -1.61879368066456 | -2.52455129209375 | -5.90952659589630 |

|   |                   |                   |                   |
|---|-------------------|-------------------|-------------------|
| H | 0.98182019860391  | -3.20732710832136 | -0.31708593251648 |
| H | 1.64740302676675  | -4.68310179093646 | -1.04515998296643 |
| H | 1.07670367872693  | -3.35685958058130 | -2.08149891987599 |
| H | -6.46717385273798 | -6.53492376485495 | -0.36649579324673 |
| H | -5.60054714794181 | -8.00598382047162 | -0.86688571746018 |
| H | -5.65695901033245 | -7.54580859010590 | 0.84122791077210  |
| H | -6.83376831379720 | -4.32873392637422 | 2.87163033237929  |
| H | -8.46191419200969 | -4.85282960655425 | 2.41320886728685  |
| H | -7.05683564083581 | -5.83853513127822 | 1.97697223459669  |
| H | -5.55841221203913 | -0.93125828713384 | 1.71659068993314  |
| H | -5.91716443555301 | -2.22175014453199 | 2.87677264733215  |
| H | -4.81026152182815 | -0.90031831921536 | 3.31784929221009  |
| H | -1.57608787579173 | 4.24604281642360  | -2.12225873231168 |
| H | -0.50539564631637 | 3.07424701512082  | -1.32324746711159 |
| H | -0.64678791570893 | 3.09113212197529  | -3.11190266588233 |
| H | -0.18452459481729 | 0.32438035951245  | -1.77528020488125 |
| H | 0.81248023679492  | 0.50873330676981  | -0.31642367544507 |
| H | 0.91902564610807  | -0.98698119353459 | -1.28720450334534 |
| H | -4.49323056041562 | -0.74904658764056 | -0.41649277425754 |
| H | -4.47229966206984 | -0.13842111382450 | -2.09006091347375 |
| H | -5.97625754119340 | -0.80159992253092 | -1.39686378552232 |

**[Hg(Cys)<sub>2</sub>]<sup>-1</sup>**

|    |                   |                   |                   |
|----|-------------------|-------------------|-------------------|
| Hg | -0.32584291702576 | 0.28210765506501  | -0.66771940872817 |
| S  | -0.02910994631018 | 0.82487480255772  | -2.91848291002342 |
| S  | -0.99781414787842 | -0.78211069119653 | 1.30723506144050  |
| O  | 2.71888467036932  | 4.24028437117704  | -0.70322767932050 |
| O  | 3.77607573787458  | 3.53470655583151  | -2.56506779385168 |
| O  | -1.70540819190789 | 2.72243595867956  | 0.08483190719089  |
| O  | -0.12183668750883 | 3.26642316172141  | 1.60666345837885  |
| N  | 1.57151518431963  | 1.76799180250853  | -0.31238177996864 |
| N  | -3.12949703620746 | 1.31736213060594  | 1.72420890681519  |
| C  | 0.97627619393867  | 2.32395586973376  | -2.61685916737014 |
| C  | -0.92602465394143 | 0.53638164522128  | 2.56832532087593  |
| C  | 2.11674255426423  | 2.11452320167208  | -1.62270089143745 |
| C  | 2.95550538425474  | 3.41115695311775  | -1.61759614614297 |
| C  | -1.80997178808523 | 1.74498790606171  | 2.25736720538309  |
| C  | -1.15040133810547 | 2.67578090406608  | 1.21965215397735  |
| H  | -3.25834309975711 | 1.84696112860797  | 0.84580520310419  |
| H  | -3.90533631728641 | 1.48757942550987  | 2.36297399284743  |
| H  | 1.38958899339941  | 2.61993399511197  | -3.58265923132709 |
| H  | 0.32394298145323  | 3.12326325936280  | -2.25239951103617 |
| H  | -1.25661610422811 | 0.05793186298286  | 3.49334838946729  |
| H  | 0.09355477633557  | 0.89450103221505  | 2.71000075856622  |
| H  | 2.74312163085367  | 1.29141530766231  | -1.97469686168916 |
| H  | -3.09924488716929 | 0.31792429654433  | 1.47578965362095  |
| H  | -1.97751173350311 | 2.31213575972626  | 3.17323120318988  |
| H  | 1.24203708770375  | 2.62064429565066  | 0.15082956501689  |
| H  | 2.30470365414786  | 1.38323740980307  | 0.27876860102071  |

**[Hg(Cys)<sub>2</sub>]<sup>-2</sup>**

Hg 0.52311 3.39704 5.28669  
 S 1.14106 3.37658 3.01575  
 S -0.03747 4.01260 7.48276  
 O -0.76040 -1.08504 3.57979  
 O -1.25467 -0.38469 1.49558  
 O -0.02912 0.05246 7.08585  
 O -0.24394 0.86705 9.17449  
 N -0.92272 1.49604 4.55904  
 N 1.95546 1.67757 6.43824  
 C 0.30017 0.80259 8.04392  
 C 0.70925 1.62211 2.73471  
 C -0.72468 1.26339 3.13330  
 C 1.31384 3.11862 8.33311  
 C 1.54168 1.69431 7.84022  
 C -0.94839 -0.20169 2.70473  
 H -0.59540 0.68662 5.09256  
 H -1.91308 1.59524 4.76508  
 H 1.71655 0.76252 6.06055  
 H 2.95776 1.81988 6.34701  
 H 0.84248 1.42946 1.66803  
 H 1.40500 0.98366 3.28894  
 H -1.40776 1.90441 2.57106  
 H 2.24000 3.69091 8.23168  
 H 1.04104 3.08239 9.38834  
 H 2.32373 1.26727 8.48539  
 H -0.59540 0.68662 5.09256  
 H -1.91308 1.59524 4.76508

**[Hg(Cys)<sub>4</sub>]<sup>2-</sup>**

Hg 0.12436498377521 -0.08728906197924 1.71985122508755  
 S 0.19954766521099 2.09694694360738 2.97110600558000  
 S 2.19592709932577 -0.17889744527873 0.29775648088502  
 S -0.18953884830067 -2.14382317142838 3.11164255594681  
 S -1.76939629811859 -0.03717099484438 0.05445936987504  
 O 0.01656544390701 5.97795837332335 3.12573170960213  
 O -0.25084707680996 5.16501655839776 1.03914636130481  
 O -0.54833262291564 -4.68626782167906 0.54906322495843  
 O -4.23910438268406 2.85881919582636 -0.55682996397288  
 O -0.10154942834091 -5.90607790767942 2.39439449378472  
 O -3.56180444003214 1.97191701034019 -2.51868737162225  
 O 4.29471061302168 -3.43742308142266 -0.16387166352262  
 O 4.16298549569755 -2.23386450830270 -2.06843537992024  
 N 1.99561683133060 4.44097569200441 3.74708022259262  
 N -1.74540744303272 -4.64698139434763 3.93393374926348  
 N 1.79045854765251 -3.25136039269585 0.42932878517190  
 N -1.89113120574393 3.02852442015907 0.48060461578164  
 C -1.13851578442401 1.25133817211079 -1.07852616415119  
 C 3.68404059708203 -2.78293054705654 -1.05250728606332  
 C 0.32452795742400 5.24790146726121 2.15730469907728  
 C -1.89943813512158 2.55984935521275 -0.92592177809277  
 C -1.72844497674269 -2.76546394167031 2.33832463197523  
 C -1.83318294947732 -4.27042548324649 2.49842520531082

|   |                   |                   |                   |
|---|-------------------|-------------------|-------------------|
| C | -0.71512754266650 | -5.02466354578495 | 1.75245628971373  |
| C | -3.37503422027644 | 2.44014381143273  | -1.37520801828272 |
| C | 1.61925733475301  | -1.27446613253748 | -1.04560795640212 |
| C | 1.40464950352252  | 2.94262617773073  | 1.88521740734828  |
| C | 1.59307103450426  | 4.38449967102600  | 2.31808627558865  |
| C | 2.14907445426814  | -2.69137023099322 | -0.89428523378236 |
| H | 1.70266975721896  | -3.33676904303452 | -1.65758346811600 |
| H | 0.91673174497837  | -3.82277716748736 | 0.42965245909165  |
| H | 2.60794109204441  | -3.80949444860314 | 0.71873951047839  |
| H | 1.06384985191523  | 2.94723396645380  | 0.84955942251521  |
| H | 2.36092603227973  | 2.41460869519390  | 1.91122712864235  |
| H | -1.27307638364515 | 0.92261691803277  | -2.10997563059178 |
| H | -0.06834430628421 | 1.40056085539632  | -0.90578152108060 |
| H | -1.43041750246230 | 3.33508981226902  | -1.53962036558375 |
| H | -1.24318260703792 | 3.82316733030005  | 0.66772611652367  |
| H | -2.87102265882055 | 3.30282702517489  | 0.66693178726512  |
| H | 1.98556260653863  | -0.89312333788915 | -1.99944249310466 |
| H | 0.52499937561548  | -1.27371627695198 | -1.06706489271887 |
| H | -1.72663304031933 | -2.54839726706189 | 1.27043982900774  |
| H | -2.59667354550938 | -2.27627576773134 | 2.78822878710970  |
| H | -2.79563511547120 | -4.62772711980435 | 2.12336278113206  |
| H | -1.27761591248446 | -5.56288547266941 | 3.97675600929527  |
| H | -1.14182533834019 | -3.96978329113076 | 4.41979184468499  |
| H | 3.00514375395766  | 4.41907951959760  | 3.88819786801489  |
| H | -1.65750099916728 | 2.25242860258009  | 1.11680512116426  |
| H | -2.64993774874325 | -4.68225991737210 | 4.40317499923614  |
| H | 1.68660200043790  | -2.48416657816348 | 1.10926317132592  |
| H | 2.38910715021996  | 4.85299828605265  | 1.73357321460711  |
| H | 1.59305876305946  | 5.30506457167693  | 4.13666637940870  |
| H | 1.56895760279398  | 3.64351294504566  | 4.24053627787572  |

## 6. NPA analysis of the Hg(CysSerGlyCysLys) complex

| Natural Population |          |          |          |         |          |
|--------------------|----------|----------|----------|---------|----------|
| Natural -----      |          |          |          |         |          |
| Atom No            | Charge   | Core     | Valence  | Rydberg | Total    |
| -----              |          |          |          |         |          |
| Hg 1               | 1.06183  | 67.99542 | 10.72758 | 0.21516 | 78.93817 |
| S 2                | -0.44007 | 9.99936  | 6.29160  | 0.14911 | 16.44007 |
| S 3                | -0.43215 | 9.99936  | 6.28431  | 0.14848 | 16.43215 |
| O 4                | -0.64211 | 1.99955  | 6.55322  | 0.08935 | 8.64211  |
| O 5                | -0.63313 | 1.99955  | 6.54408  | 0.08950 | 8.63313  |
| O 6                | -0.66806 | 1.99954  | 6.57454  | 0.09398 | 8.66806  |
| O 7                | -0.72268 | 1.99967  | 6.63534  | 0.08767 | 8.72268  |
| O 8                | -0.67155 | 1.99952  | 6.58205  | 0.08999 | 8.67155  |
| O 9                | -0.65672 | 1.99955  | 6.56580  | 0.09137 | 8.65672  |
| N 10               | -0.56393 | 1.99912  | 5.48461  | 0.08020 | 7.56393  |
| N 11               | -0.61915 | 1.99912  | 5.53597  | 0.08407 | 7.61915  |
| N 12               | -0.56526 | 1.99911  | 5.48922  | 0.07693 | 7.56526  |
| N 13               | -0.82570 | 1.99943  | 5.74028  | 0.08600 | 7.82570  |
| N 14               | -0.59349 | 1.99913  | 5.51382  | 0.08053 | 7.59349  |

|      |          |         |         |         |         |
|------|----------|---------|---------|---------|---------|
| N 15 | -0.86233 | 1.99944 | 5.77320 | 0.08969 | 7.86233 |
| N 16 | -0.77978 | 1.99923 | 5.70131 | 0.07924 | 7.77978 |
| C 17 | -0.16409 | 1.99895 | 4.10071 | 0.06443 | 6.16409 |
| C 18 | -0.15434 | 1.99895 | 4.09032 | 0.06508 | 6.15434 |
| C 19 | 0.63271  | 1.99918 | 3.29417 | 0.07394 | 5.36729 |
| C 20 | -0.51185 | 1.99908 | 4.44007 | 0.07269 | 6.51185 |
| C 21 | 0.63654  | 1.99909 | 3.28592 | 0.07845 | 5.36346 |
| C 22 | -0.15222 | 1.99897 | 4.09015 | 0.06310 | 6.15222 |
| C 23 | 0.65563  | 1.99914 | 3.26072 | 0.08451 | 5.34437 |
| C 24 | -0.05088 | 1.99905 | 3.99131 | 0.06052 | 6.05088 |
| C 25 | 0.63448  | 1.99911 | 3.27963 | 0.08678 | 5.36552 |
| C 26 | 0.64081  | 1.99919 | 3.28436 | 0.07564 | 5.35919 |
| C 27 | -0.15363 | 1.99896 | 4.08843 | 0.06623 | 6.15363 |
| C 28 | -0.51166 | 1.99908 | 4.43603 | 0.07655 | 6.51166 |
| C 29 | -0.30760 | 1.99903 | 4.25159 | 0.05698 | 6.30760 |
| C 30 | -0.37911 | 1.99914 | 4.32522 | 0.05475 | 6.37911 |
| C 31 | -0.38995 | 1.99918 | 4.33257 | 0.05820 | 6.38995 |
| C 32 | -0.40162 | 1.99918 | 4.34382 | 0.05862 | 6.40162 |
| C 33 | -0.19672 | 1.99919 | 4.14098 | 0.05654 | 6.19672 |
| H 34 | 0.45496  | 0.00000 | 0.53775 | 0.00730 | 0.54504 |
| H 35 | 0.24336  | 0.00000 | 0.75061 | 0.00604 | 0.75664 |
| H 36 | 0.43769  | 0.00000 | 0.55746 | 0.00485 | 0.56231 |
| H 37 | 0.42502  | 0.00000 | 0.56902 | 0.00596 | 0.57498 |
| H 38 | 0.17945  | 0.00000 | 0.81470 | 0.00585 | 0.82055 |
| H 39 | 0.19981  | 0.00000 | 0.79366 | 0.00653 | 0.80019 |
| H 40 | 0.23920  | 0.00000 | 0.75398 | 0.00682 | 0.76080 |
| H 41 | 0.20730  | 0.00000 | 0.78679 | 0.00591 | 0.79270 |
| H 42 | 0.43210  | 0.00000 | 0.56341 | 0.00449 | 0.56790 |
| H 43 | 0.23402  | 0.00000 | 0.75952 | 0.00647 | 0.76598 |
| H 44 | 0.22817  | 0.00000 | 0.76537 | 0.00646 | 0.77183 |
| H 45 | 0.36781  | 0.00000 | 0.62652 | 0.00567 | 0.63219 |
| H 46 | 0.23236  | 0.00000 | 0.76097 | 0.00666 | 0.76764 |
| H 47 | 0.23316  | 0.00000 | 0.75879 | 0.00805 | 0.76684 |
| H 48 | 0.36622  | 0.00000 | 0.62873 | 0.00505 | 0.63378 |
| H 49 | 0.35864  | 0.00000 | 0.63590 | 0.00546 | 0.64136 |
| H 50 | 0.16633  | 0.00000 | 0.82678 | 0.00690 | 0.83367 |
| H 51 | 0.17584  | 0.00000 | 0.81740 | 0.00676 | 0.82416 |
| H 52 | 0.20711  | 0.00000 | 0.78668 | 0.00620 | 0.79289 |
| H 53 | 0.19186  | 0.00000 | 0.80206 | 0.00608 | 0.80814 |
| H 54 | 0.19506  | 0.00000 | 0.79854 | 0.00640 | 0.80494 |
| H 55 | 0.21369  | 0.00000 | 0.78003 | 0.00628 | 0.78631 |
| H 56 | 0.21178  | 0.00000 | 0.78220 | 0.00603 | 0.78822 |
| H 57 | 0.21260  | 0.00000 | 0.78150 | 0.00590 | 0.78740 |
| H 58 | 0.48946  | 0.00000 | 0.50507 | 0.00547 | 0.51054 |
| H 59 | 0.19158  | 0.00000 | 0.80222 | 0.00620 | 0.80842 |
| H 60 | 0.22423  | 0.00000 | 0.77036 | 0.00541 | 0.77577 |
| H 61 | 0.24415  | 0.00000 | 0.74992 | 0.00594 | 0.75585 |
| H 62 | 0.42169  | 0.00000 | 0.57458 | 0.00373 | 0.57831 |
| H 63 | 0.42500  | 0.00000 | 0.57041 | 0.00458 | 0.57500 |
| H 64 | 0.37815  | 0.00000 | 0.61686 | 0.00500 | 0.62185 |

---

\* Total \* 0.00000 147.97057 191.06072 2.96872 342.00000

### Natural Population

```

-----
Effective Core      60.00000
Core                87.97057 ( 99.9666% of  88)
Valence            191.06072 ( 98.4849% of 194)
Natural Minimal Basis 339.03128 ( 99.1320% of 342)
Natural Rydberg Basis  2.96872 (  0.8680% of 342)
-----

```

### Atom No      Natural Electron Configuration

```

-----
Hg 1  [core]6s( 0.98)5d( 9.75)6p( 0.08)5f( 0.09)6d( 0.03)7p( 0.01)
S 2  [core]3s( 1.76)3p( 4.53)4s( 0.01)3d( 0.10)4p( 0.03)4f( 0.01)
S 3  [core]3s( 1.76)3p( 4.52)4s( 0.01)3d( 0.10)4p( 0.03)4f( 0.01)
O 4  [core]2s( 1.69)2p( 4.87)3s( 0.01)3p( 0.03)3d( 0.04)
O 5  [core]2s( 1.69)2p( 4.85)3s( 0.01)3p( 0.03)3d( 0.04)
O 6  [core]2s( 1.70)2p( 4.88)3s( 0.01)3p( 0.04)3d( 0.04)
O 7  [core]2s( 1.68)2p( 4.96)3s( 0.01)3p( 0.04)3d( 0.04)
O 8  [core]2s( 1.69)2p( 4.89)3s( 0.01)3p( 0.03)3d( 0.04)
O 9  [core]2s( 1.70)2p( 4.87)3s( 0.01)3p( 0.04)3d( 0.04)
N 10 [core]2s( 1.26)2p( 4.22)3s( 0.01)3p( 0.03)3d( 0.04)
N 11 [core]2s( 1.28)2p( 4.26)3s( 0.01)3p( 0.03)3d( 0.04)
N 12 [core]2s( 1.27)2p( 4.22)3p( 0.03)3d( 0.04)
N 13 [core]2s( 1.43)2p( 4.31)3p( 0.03)3d( 0.04)
N 14 [core]2s( 1.28)2p( 4.24)3s( 0.01)3p( 0.03)3d( 0.04)
N 15 [core]2s( 1.43)2p( 4.34)3p( 0.04)3d( 0.04)
N 16 [core]2s( 1.33)2p( 4.37)3p( 0.03)3d( 0.04)
C 17 [core]2s( 1.02)2p( 3.08)3p( 0.02)3d( 0.02)
C 18 [core]2s( 1.00)2p( 3.09)3p( 0.03)3d( 0.02)
C 19 [core]2s( 0.83)2p( 2.47)3s( 0.01)3p( 0.04)3d( 0.02)
C 20 [core]2s( 1.13)2p( 3.31)3p( 0.02)3d( 0.04)
C 21 [core]2s( 0.81)2p( 2.47)3s( 0.01)3p( 0.04)3d( 0.02)4f( 0.01)
C 22 [core]2s( 1.00)2p( 3.09)3p( 0.02)3d( 0.02)
C 23 [core]2s( 0.82)2p( 2.44)3s( 0.01)3p( 0.04)3d( 0.02)4d( 0.01)
C 24 [core]2s( 1.03)2p( 2.96)3s( 0.01)3p( 0.02)3d( 0.03)
C 25 [core]2s( 0.83)2p( 2.45)3s( 0.01)3p( 0.04)3d( 0.02)4f( 0.01)
C 26 [core]2s( 0.82)2p( 2.46)3s( 0.01)3p( 0.04)3d( 0.02)
C 27 [core]2s( 1.01)2p( 3.08)3p( 0.02)3d( 0.03)
C 28 [core]2s( 1.12)2p( 3.32)3p( 0.02)3d( 0.04)
C 29 [core]2s( 1.06)2p( 3.19)3p( 0.02)3d( 0.03)
C 30 [core]2s( 1.06)2p( 3.27)3p( 0.02)3d( 0.03)
C 31 [core]2s( 1.04)2p( 3.29)3p( 0.02)3d( 0.03)
C 32 [core]2s( 1.05)2p( 3.29)3p( 0.02)3d( 0.03)
C 33 [core]2s( 1.03)2p( 3.11)3p( 0.02)3d( 0.02)
H 34      1s( 0.54)
H 35      1s( 0.75)
H 36      1s( 0.56)
H 37      1s( 0.57)
H 38      1s( 0.81)
H 39      1s( 0.79)
H 40      1s( 0.75)

```



|      |           |
|------|-----------|
| H 41 | 1s( 0.79) |
| H 42 | 1s( 0.56) |
| H 43 | 1s( 0.76) |
| H 44 | 1s( 0.77) |
| H 45 | 1s( 0.63) |
| H 46 | 1s( 0.76) |
| H 47 | 1s( 0.76) |
| H 48 | 1s( 0.63) |
| H 49 | 1s( 0.64) |
| H 50 | 1s( 0.83) |
| H 51 | 1s( 0.82) |
| H 52 | 1s( 0.79) |
| H 53 | 1s( 0.80) |
| H 54 | 1s( 0.80) |
| H 55 | 1s( 0.78) |
| H 56 | 1s( 0.78) |
| H 57 | 1s( 0.78) |
| H 58 | 1s( 0.51) |
| H 59 | 1s( 0.80) |
| H 60 | 1s( 0.77) |
| H 61 | 1s( 0.75) |
| H 62 | 1s( 0.57) |
| H 63 | 1s( 0.57) |
| H 64 | 1s( 0.62) |
